# Supplementary material
Source: publisher figshare collection journal article supplement (https://acs.figshare.com/ndownloader/files/4465825)

## SUPPORTING INFORMATION

### Annulated Diketopiperazines from Dipeptides or Schöllkopf Reagents via Tandem Cyclization-Intramolecular *N*-Arylation

Hwan Jung Lim, Judith C. Gallucci and T. V. RajanBabu\*

Department of Chemistry, The Ohio State University, Columbus, OH 43210 USA

#### Table of Contents

|                                                                                                                                               |    |
|-----------------------------------------------------------------------------------------------------------------------------------------------|----|
| <b>General Information</b>                                                                                                                    | S3 |
| Synthesis of 4,7-dibromo-1 <i>H</i> -indole ( <b>5</b> )                                                                                      | S3 |
| Synthesis of 4,7-dibromo-1 <i>H</i> -indole-3-carboxaldehyde ( <b>6</b> )                                                                     | S3 |
| Synthesis of 4,7-dibromo- <i>N</i> -Boc-indole carboxaldehyde ( <b>7</b> )                                                                    | S4 |
| Synthesis of <i>N</i> -Boc, <i>N</i> -Me- <i>L</i> -valine amide ( <b>9</b> )                                                                 | S4 |
| Synthesis of ethyl 2-diazo-2-(diethoxyphosphoryl)acetate ( <b>10</b> )                                                                        | S5 |
| Synthesis of Schmidt's phosphonate <b>11</b>                                                                                                  | S5 |
| Synthesis of enamide <b>12</b> using Horner-Emmons reaction                                                                                   | S5 |
| General procedure for Rh-catalyzed asymmetric hydrogenation (Table 1).                                                                        |    |
| Synthesis of <b>13a</b>                                                                                                                       | S6 |
| Use of {[ <i>(SS)</i> -Et-DuPhos]Rh[COD]} <sup>+</sup> BF <sub>4</sub> <sup>-</sup> -catalyzed asymmetric hydrogenation<br>(entry 5, Table 1) | S6 |
| <b>Table 1.</b> Rh(I)-Catalyzed Hydrogenation of the Dehydro-dipeptide <b>12</b>                                                              | S7 |
| Attempts to prepare indolyl <i>N</i> -BOC protected NHMe dipeptide <b>13c</b><br>by selective deprotection of the BOC group in Valine         | S7 |
| Synthesis of the dipeptide <b>13b</b> by deprotection of both BOC groups                                                                      | S7 |
| Synthesis of indolyl <i>N</i> -BOC protected dipeptide <b>13c</b> by selective<br>deprotection of the BOC group in valine                     | S8 |
| General procedure of Buchwald-Hartwig amination for<br>macrocyclization (Table 2)                                                             | S9 |
| <b>Table 2.</b> Attempted Pd-catalyzed Intramolecular <i>N</i> -Arylation Reactions                                                           | S9 |
| Synthesis of tetracyclic DKP <b>14</b> by the Cu-mediated tandem cyclization                                                                  | S9 |
| Synthesis of ( <i>S</i> )- <i>N</i> -BOC-valinyl 2-bromophenylalanyl ethyl ester ( <b>19</b> )                                                |    |

|                                                                                                                           |     |
|---------------------------------------------------------------------------------------------------------------------------|-----|
| using Horner-Emmons reaction followed by hydrogenation                                                                    | S10 |
| (a) Synthesis of dehydrodipeptide substrate <b>18</b>                                                                     | S10 |
| (b) Synthesis of dipeptide <b>19</b> using Rh-catalyzed asymmetric<br>hydrogenation of <b>18</b> (entry 3, Table 3)       | S11 |
| <b>Table 3.</b> Rh-catalyzed asymmetric hydrogenations of Z-dehydro-dipeptide <b>18</b>                                   | S12 |
| Dipeptide N-Val-2-Br-Phe-OEt ( <b>20</b> ) via deprotection of the BOC group from <b>19</b>                               | S12 |
| Synthesis of 2-bromophenylalanine ( <b>23a</b> ) using Schöllkopf reagent                                                 | S13 |
| Synthesis of o-iodo phenylalanine ( <b>23b</b> ) using Schöllkopf reagent                                                 | S14 |
| Synthesis of dipeptide <b>25b</b> using a peptide coupling reaction,<br>followed by deprotection                          | S14 |
| General procedure of Cu-mediated tandem cyclizations (Table 1 in the article)                                             | S15 |
| Synthesis of the tricyclic DKP <b>27</b> and <b>28</b> by Cu-mediated tandem cyclization                                  | S16 |
| Synthesis of the tricyclic DKPs <b>27</b> and <b>28</b> by catalytic amount of Cu-mediated<br>tandem cyclization          | S16 |
| Synthesis of proline-containing dipeptide <b>26a</b> by an aminoacid coupling<br>reaction, and deprotection to <b>26b</b> | S16 |
| Synthesis of the tetracyclic DKPs <b>29</b> and <b>30</b> by Cu-mediated tandem cyclization                               | S17 |
| General procedure of demethylations of dimethoxy-2,5-dihydropyrazine<br>to 2,5-diketopiperazine                           | S18 |
| Synthesis of (3 <i>S</i> ,6 <i>R</i> )-3-(2-bromobenzyl)-6-isopropylpiperazine-2,5-dione ( <b>31a</b> )                   | S18 |
| Synthesis of (3 <i>S</i> ,6 <i>R</i> )-3-(2-iodobenzyl)-6-isopropylpiperazine-2,5-dione ( <b>31b</b> )                    | S18 |
| Synthesis of tricyclic DKP <b>32</b> using stoichiometric amount of CuI                                                   | S19 |
| Synthesis of tricyclic DKP <b>32</b> using catalytic amount of CuI and<br>bromo-substrate <b>31a</b>                      | S19 |
| Synthesis of tricyclic DKP <b>32</b> using stoichiometric amount of CuI and<br>iodo-substrate <b>31b</b>                  | S20 |
| Synthesis of tricyclic DKP <b>32</b> using catalytic amount of CuI and<br>iodo-substrate <b>31b</b>                       | S20 |
| Synthesis of tricyclic DKP <i>ent</i> - <b>28</b>                                                                         | S20 |
| <b>REFERENCES</b>                                                                                                         | S20 |
| <sup>1</sup> H and <sup>13</sup> C NMR Spectra of key compounds                                                           | S22 |

**General Information.** All solvents were dried by standard methods prior to use. Methylene chloride was distilled from calcium hydride under nitrogen and stored over molecular sieves. Tetrahydrofuran was distilled under nitrogen from sodium/benzophenone ketyl. Reactions requiring air-sensitive manipulations were conducted under an inert atmosphere of nitrogen by using Schlenk techniques or a Vacuum Atmospheres glovebox. Analytical TLC was performed on E. Merck precoated (0.25 mm) silica gel 60 F254 plates. Flash column chromatography was carried out on silica gel 40 (Scientific Adsorbents Incorporated, Microns Flash). NMR experiments were performed using CDCl<sub>3</sub> with CHCl<sub>3</sub> ( $\delta$  7.24) as an internal standard. Optical rotations were recorded on a Perkin-Elmer Model 241 polarimeter at the sodium D line in chloroform. Rhodium catalysts for asymmetric hydrogenation, CuI, and CsOAc were stored in a Vacuum Atmospheres drybox. CuI and CsOAc were purchased from Sigma-Aldrich Inc. Both Rh(COD)(*S,S*-MeDuPhos)BF<sub>4</sub> and ethyl analogue were either purchased from Strem Chemicals or prepared by known routes.<sup>1</sup> (*R*)-Schöllkopf reagent<sup>2</sup> and other Rh-hydrogenation catalysts (Tables 1 and 3)<sup>3</sup> were prepared according to procedures published before. For pressurized hydrogenation reaction, Parr Pressure Reactor was used.

**Synthesis of 4,7-dibromo-1*H*-indole (5).** Under N<sub>2</sub> atmosphere, 1 M vinyl magnesium bromide (160.5 mL, 16.05 mmol) in anhydrous THF (320 mL) was added to a stirred solution of 2,5-dibromonitrobenzene (15 g, 5.34 mmol) at - 70 °C. The resulting mixture was stirred additional 20 min at - 50 °C, and then poured into sat. NH<sub>4</sub>Cl.

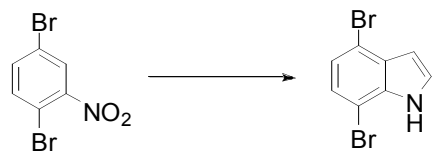

After the crude product was extracted with EtOAc (300 mL x 3), combined organics were dried over MgSO<sub>4</sub> and evaporated under reduced pressure. The crude product was purified by column chromatography (10 % EtOAc in hexane.) to yield 6.95 g (47 %) of the title compound. <sup>1</sup>H NMR  $\delta$  (CDCl<sub>3</sub>): 8.39 (br s, 1H, *NH*), 7.28-7.21 (m, 3H, Ar 2, 5, and 6), 6.73-6.71 (dd, 1H, *J* = 3.2, 2.4 Hz, Ar 3); <sup>13</sup>C NMR  $\delta$  (CDCl<sub>3</sub>): 134.6, 129.5, 125.5, 125.1, 123.1, 104.4, 103.9.

**Synthesis of 4,7-dibromo-1*H*-indole-3-carboxaldehyde (6).** To an ice-cooled reaction vessel containing DMF (50 mL) under N<sub>2</sub> atmosphere, POCl<sub>3</sub> (2.6 mL, 27.2 mmol) was added dropwise. Indole **5** (6.8 g, 24.7 mmol) in DMF (100 mL) was slowly added to the mixture. The resulting solution was stirred for 1 h at 0 °C and then for 5 h at RT. After the starting indole was consumed completely, the solution was poured into

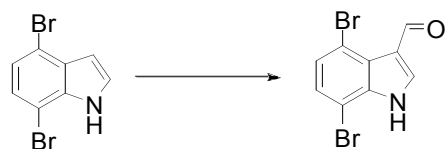

crushed ice. The mixture was treated with 1 M NaOH to adjust pH to 10 ~ 11, followed by quick heating to boil for 5 min. The mixture was cooled to 0 °C, and then acidified with 3 M HCl. The desired aldehyde was collected by filtration, and washed with water and hexane to get 5.9 g (79 %) of the title compound. <sup>1</sup>H NMR δ (DMSO-d<sub>6</sub>): 10.67 (s, 1H, CHO), 8.28 (s, 1H, Ar 2), 7.40 (s, 2H, Ar 5 and 6); <sup>13</sup>C NMR δ (DMSO-d<sub>6</sub>): 146.1, 144.3, 136.7, 135.8, 135.6, 128.5, 121.4, 114.7.

**Synthesis of 4,7-dibromo-*N*-Boc-indole carboxaldehyde (7).** To a stirred solution of 4,7-

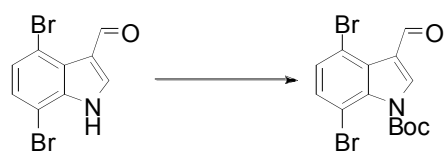

dibromo-1*H*-indole-3-carboxaldehyde **6** (10 g, 33.0 mmol) in THF (500 mL) was added NaH (3.4 g, 83.0 mmol) at 0 °C portionwise. After H<sub>2</sub> gas evolution ceased, (BOC)<sub>2</sub>O (8.8 g, 44.0 mmol) in THF (200 mL) was added slowly. The resulting mixture was stirred overnight at RT, and then the reaction was quenched by slow addition of water (500 mL). The crude product was extracted by ether (500 mL x 3) and the combined organic layers was dried over MgSO<sub>4</sub> and evaporated under reduced pressure. The crude product was purified by column chromatography (10 % EtOAc in hexane.) to get 11.1 g (83 %) of the title compound. <sup>1</sup>H NMR δ (CDCl<sub>3</sub>): 10.92 (s, 1H, CHO), 8.25 (s, 1H, Ar), 7.43-7.37 (dd, 2H, J = 12.8, 8.4 Hz, Ar), 1.65 (s, 9H, tBu); <sup>13</sup>C NMR δ (CDCl<sub>3</sub>): 186.5, 147.1, 135.4, 135.3, 131.2, 129.9, 129.7, 121.0, 113.0, 107.5, 87.1, 28.0; IR cm<sup>-1</sup> (KBr) : 3142, 2978, 2937, 2887, 1764, 1668, 1544, 1534, 1470, 1374, 1310, 1235, 1144, 1021.

**Synthesis of *N*-Boc,*N*-Me-*L*-valine amide (9).**<sup>4</sup> To a stirred solution of *N*-Boc,*N*-Me-*L*-valine

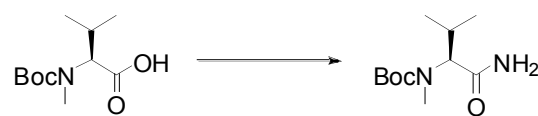

(5 g, 21.6 mmol) and *N*-methyl morpholine (2.38 mL, 21.6 mmol) in anhydrous DME (100 mL) was added isobutyl chloroformate (2.82 mL, 21.65 mmol) dropwise at – 15 °C. After 0.5 h of stirring, NH<sub>3</sub> gas was bubbled into the reaction mixture for 15 min at – 15 °C and, for additional 15 min at rt. After addition of water (100 mL), the crude product was extracted by chloroform (100 mL x 3) and the combined organics were dried over MgSO<sub>4</sub> and evaporated under reduced pressure. The crude product was purified by recrystallization (10 % EtOAc in hexane.) to yield 3.9 g (78 %) of the title compound. <sup>1</sup>H NMR δ (CDCl<sub>3</sub>): 6.14 (br s, 1H, CONH<sub>2</sub>), 5.35 (br s, 1H, CONH<sub>2</sub>), 4.07-4.04 (d, 1H, J = 10.8 Hz, α-H), 2.78 (s, 3H, NCH<sub>3</sub>), 2.27-2.18 (m, 1H, -CH(CH<sub>3</sub>)<sub>2</sub>), 1.45 (s, 9H, tBu), 0.96-0.94 (d, 3H, J = 6.4 Hz, -CH(CH<sub>3</sub>)<sub>2</sub>), 0.86-0.84 (d, 3H, J = 6.8 Hz, -CH(CH<sub>3</sub>)<sub>2</sub>); <sup>13</sup>C NMR δ (CDCl<sub>3</sub>): 173.2,

157.0, 80.3, 64.0, 30.2, 28.5, 26.1, 19.8, 18.6.

**Synthesis of ethyl 2-diazo-2-(diethoxyphosphoryl)acetate (10).<sup>5</sup>**

To a stirred solution of triethyl phosphonate (2.5 g, 11.15 mmol) in anhydrous THF was added a mixture of NaH (0.54 g, 13.38 mmol) and *p*-toluenesulfonyl azide (2.64 g, 13.38 mmol) in THF (5 mL) slowly at 0 °C. The resulting mixture was stirred at the same temperature for 10 min, and then stirred additional 10 min at RT. After ether (10 mL) and water (10 mL) were added, the crude product was extracted by ether (10 mL x 3). The combined organic layers was dried over MgSO<sub>4</sub> and evaporated under reduced pressure. The crude product was purified by column chromatography (25 % EtOAc in hexane.) to get 2.35 g (84 %) of the title compound. <sup>1</sup>H NMR δ (CDCl<sub>3</sub>): 4.24-4.10 (m, 4H, -OCH<sub>2</sub>CH<sub>3</sub>), 1.32-1.23 (m, 6H, -OCH<sub>2</sub>CH<sub>3</sub>); <sup>13</sup>C NMR δ (CDCl<sub>3</sub>): 163.6, 163.4, 63.7, 61.8, 16.3, 14.5.

**Synthesis of Schmidt's phosphonate 11.<sup>5</sup>**

To a single-necked rb flask, triethyl diazophosphonate (2.2 g, 4.34 mmol), *N*-Boc,*N*-Me-*L*-valine amide (2 g, 4.34 mmol) were added. After the solution was treated with rhodium acetate (19 mg, 0.087 mmol), the mixture was heated to refluxed temperature until the starting diazo-compound was completely consumed. The solvent was evaporated, and the crude product was purified by column chromatography (10 % EtOAc in hexane) to get 11.1 g (83 %) of the title compound. <sup>1</sup>H NMR δ (CDCl<sub>3</sub>): 4.30-4.05 (m, 8H, 3OCH<sub>2</sub>CH<sub>3</sub>, 2α-H), 2.76 (s, 3H, NCH<sub>3</sub>), 2.30-2.14 (m, 1H, *i*Pr), 1.43 (s, 9H, *t*Bu), 1.35-1.20 (m, 9H, 3OCH<sub>2</sub>CH<sub>3</sub>), <sup>13</sup>C NMR δ (CDCl<sub>3</sub>): 167.5, 166.3, 80.2, 68.5, 64.5, 63.6, 61.7, 51.2, 49.7, 30.0, 28.3, 19.7, 18.9, 18.4, 16.3, 14.9, 14.1; <sup>31</sup>P NMR δ (CDCl<sub>3</sub>): 15.9, 14.4; IR cm<sup>-1</sup> (KBr pellet): 3372, 3195, 2973, 1743, 1677, 1471, 1444, 1366, 1311, 1255, 1166, 1028.

**Synthesis of enamide 12 using Horner-Emmons reaction.<sup>6</sup>**

After the aldehyde 7 (2.3 g, 5.71 mmol) and Schmidt's phosphonate 11 in anhydrous CH<sub>2</sub>Cl<sub>2</sub> were treated with DBU (0.94 mL, 5.80 mmol) at 0 °C, the resulting mixture was stirred for 1 d at RT. The solvent was evaporated, and the crude product (12) was purified by column chromatography (20 % to 50 % EtOAc in hexane) to get 2.7 g (71 %) of the title compound. <sup>1</sup>H NMR δ (CDCl<sub>3</sub>): 8.23 (s, 1H,

enamide), 7.76 (s, 1H, Ar2), 7.34-7.32 (d, 1H, J = 8.4 Hz, Ar), 7.28-7.26 (d, 1H, J = 8.4 Hz, Ar), 4.30-4.20 (m, 3H, -OCH<sub>2</sub>CH<sub>3</sub> & α-H of Val.), 2.82 (s, 3H, -NCH<sub>3</sub>), 2.29 (br s, 1H, -CH(CH<sub>3</sub>)<sub>2</sub>), 1.65 (s, 9H, tBu), 1.43 (s, 9H, tBu), 1.33-1.30 (t, 3H, J = 7.2 Hz, -OCH<sub>2</sub>CH<sub>3</sub>), 1.01-0.99 (d, 3H, J = 6.4 Hz, -CH(CH<sub>3</sub>)<sub>2</sub>), 0.87-0.85 (d, 3H, J = 6.8 Hz, -CH(CH<sub>3</sub>)<sub>2</sub>); <sup>13</sup>C NMR δ (CDCl<sub>3</sub>): 169.8, 164.6, 157.3, 147.6, 134.9, 131.0, 130.7, 130.5, 129.1, 125.6, 124.0, 114.5, 113.5, 107.5, 85.9, 80.6, 61.5, 30.6, 28.4, 27.9, 25.9, 20.2, 18.6, 14.4; IR cm<sup>-1</sup> (KBr pellet) : 3423, 3256, 2969, 2921, 2873, 1755, 1666, 1468, 1367, 1241, 1146; HRMS 724.1034 (M+Na<sup>+</sup> ; calcd for C<sub>29</sub>H<sub>39</sub>Br<sub>2</sub>NaN<sub>3</sub>O<sub>7</sub> 724.1029).

**General procedure for Rh-catalyzed asymmetric hydrogenation (Table 1). Synthesis of**

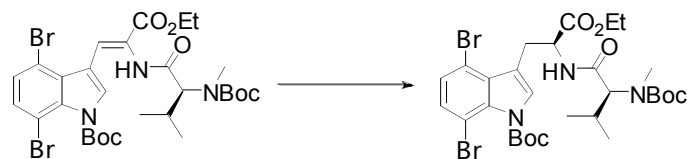

**13a.**<sup>1,3</sup> To a high-pressure Parr reactor, enamide **12**, Rh-catalyst (10 mol%) and degassed MeOH (10 mL) were added in a N<sub>2</sub>-charged drybox. The reactor was

brought out of the box, and set up in a fume hood. The reactor was evacuated and refilled with H<sub>2</sub>-gas three times and finally pressurized to 90 psi. The mixture was stirred for 4 d at RT. After the pressure was released, the solvent was evaporated, and the crude product was purified by column chromatography. Hydrogenation of **12** was conducted using the following complexes and the results are recorded in Table 1: {[*(RR)*-2,5-diphenylphosphinohexane]Rh[NBD]}<sup>+</sup>BF<sub>4</sub><sup>-</sup>, {[*(RR)*-3,6-diphenylphosphino-2.7-dimethyloctane] Rh[NBD]}<sup>+</sup>BF<sub>4</sub><sup>-</sup> (Table 1, entries 1, 2); {[*(SS)*-Me-DuPhos]Rh[NBD]}<sup>+</sup>BF<sub>4</sub><sup>-</sup> (entries 3 and 4).

**Use of [(*SS*)-Et-DuPhos]Rh[COD]}<sup>+</sup>BF<sub>4</sub><sup>-</sup>-catalyzed asymmetric hydrogenation (entry 5, Table 1).**<sup>1</sup> Following the general procedure, enamide **12** (0.5 g, 0.73 mmol) was hydrogenated using Rh[COD](Et-*S,S*-Duphos)<sup>+</sup>BF<sub>4</sub><sup>-</sup> (44.0 mg, 0.073 mmol) and degassed MeOH (10 mL) under 90 psi for 4 d at RT. The crude product was purified by column chromatography (20 % EtOAc in hexane) to get 0.5 g (conv. 90 %, *S*:*R* = 8.5:1) of the title compound with 10 % of the unreacted starting enamide. <sup>1</sup>H NMR δ (CDCl<sub>3</sub>): 7.41 (s, 1H, Ar), 7.34-7.32 (d, 1H, J = 8.4 Hz, Ar), 7.28-7.24 (t, 1H, J = 8.0 Hz, Ar), 4.9 (br s, α-H of Typ.), 4.18-4.09 (m, 2H, -OCH<sub>2</sub>CH<sub>3</sub>), 4.03-4.00 (d, 1H, J = 10 Hz, α-H of Val.), 3.55-3.50 (dd, 1H, J = 15.2, 5.6 Hz, -CH<sub>2</sub>-), 3.38-3.32 (dd, 1H, J = 14.8, 8.8 Hz, -CH<sub>2</sub>-), 2.70 (s, 3H, -NCH<sub>3</sub>), 2.25 (br s, 1H, -CH(CH<sub>3</sub>)<sub>2</sub>), 1.64 (s, 9H, tBu), 1.36 (s, 9H, tBu), 1.33-1.30 (t, 3H, J = 7.0 Hz, -OCH<sub>2</sub>CH<sub>3</sub>), 0.94-0.93 (d, 3H, J = 6.4 Hz, -CH(CH<sub>3</sub>)<sub>2</sub>), 0.85-0.84 (d, 3H, J = 6.4 Hz, -CH(CH<sub>3</sub>)<sub>2</sub>); <sup>13</sup>C NMR δ (CDCl<sub>3</sub>): 171.1, 170.5, 147.6;

135.5, 131.2, 130.3, 129.2, 128.4, 113.3, 107.4, 84.9, 80.2, 61.4, 60.4, 28.2, 27.9, 21.0, 18.5, 14.2; IR  $\text{cm}^{-1}$  (neat) : 3322, 3119, 3057, 2976, 2873, 1746, 1693, 1530, 1469, 1392, 1315, 1242, 1153; HRMS 726.1192 ( $(\text{M}+\text{Na}^+)$ ); 726.1186 calcd for  $\text{C}_{29}\text{H}_{41}\text{Br}_2\text{NaN}_3\text{O}_7$ ).

**Table 1.** Rh(I)-Catalyzed Hydrogenation of the Dehydro-dipeptide **12**

| entry | ligand                                                                             | conditions <sup>a</sup>                 | yield % (dr) <sup>b</sup> |
|-------|------------------------------------------------------------------------------------|-----------------------------------------|---------------------------|
| 1     | 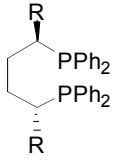  | R = Me (10 mol%), 90 psi, 3 d           | > 99 (3.2:1.0)            |
| 2     |                                                                                    | R = <i>i</i> -Pr (10 mol%), 90 psi, 3 d | 92 (2.9:1.0)              |
| 3     |  | R = Me (10 mol%), 70 psi, 4 d           | 85 (4.6:1.0)              |
| 4     |                                                                                    | R = Me (10 mol%), 90 psi, 2 d           | 88 (4.6:1.0)              |
| 5     |                                                                                    | R = Et (10 mol%), 90 psi, 4 d           | 90 (8.5:1.0)              |

<sup>a</sup> Reactions done using  $\{[\text{Rh}(\text{ligand})(\text{L})]^+ \text{BF}_4^-\}$  (L = NBD entries 1,2; or COD (entries 3-5)) in deoxygenated MeOH in a high pressure Parr hydrogenator. <sup>b</sup> dr = diastereomeric ratio, determined by  $^1\text{H}$  NMR.

### Attempts to prepare indolyl *N*-BOC protected NHMe dipeptide **13c** by selective

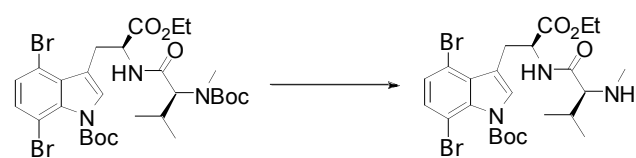

### deprotection of the BOC group in Valine.

Di-BOC-protected dipeptide **13a** was treated with 3 M HCl or only formic acid at 0 °C, and then the reaction mixture was stirred at rt for 12 h. After, the solvent was evaporated, the residue was diluted with  $\text{CH}_2\text{Cl}_2$  (10 mL) and washed with sat.  $\text{NaHCO}_3$  (10 mL). The organic layer was dried over  $\text{MgSO}_4$  and evaporated under reduced pressure. Only starting dipeptide compound **13a** was recovered.

### Synthesis of the dipeptide **13b** by deprotection of both BOC groups. Di-BOC-protected

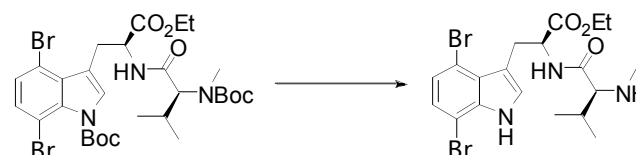

dipeptide **13a** (91 mg, 0.132 mmol) was treated with 30 % TFA in  $\text{CH}_2\text{Cl}_2$  (5 mL), and then the reaction mixture was stirred for

1 h at RT. After the starting **13a** was consumed completely, the mixture was evaporated. The residue was diluted with CH<sub>2</sub>Cl<sub>2</sub> (10 mL) and washed with sat. NaHCO<sub>3</sub> (10 mL). The organic layer was dried over MgSO<sub>4</sub> and evaporated under reduced pressure. The crude product was purified by column chromatography (EtOAc) to get 66 mg (99 %) of the desired amine **13b**. <sup>1</sup>H NMR δ (CDCl<sub>3</sub>): 8.38 (br s, 1H, NH of indole), 7.69-7.66 (d, 1H, J = 9.3 Hz, NH of amide), 7.22-7.21 (d, 1H, J = 1.0 Hz, Ar), 7.13 (s, 2H, Ar), 4.99-4.95 (m, 1H, α-H of Typ.), 4.20-4.12 (m, 2H, -OCH<sub>2</sub>CH<sub>3</sub>), 3.65-3.40 (m, 2H, benzylic H), 2.70-2.68 (d, 1H, J = 5.0 Hz, α-H of Val.), 2.32 (s, 3H, -NCH<sub>3</sub>), 1.91-1.72 (m, 1H, -CH(CH<sub>3</sub>)<sub>2</sub>), 1.23-1.17 (t, 3H, J = 7.1 Hz, -OCH<sub>2</sub>CH<sub>3</sub>), 0.86-0.83 (d, 3H, J = 6.7 Hz, -CH(CH<sub>3</sub>)<sub>2</sub>), 0.63-0.60 (d, 3H, J = 6.7 Hz, -CH(CH<sub>3</sub>)<sub>2</sub>); <sup>13</sup>C NMR δ (CDCl<sub>3</sub>): 173.8, 172.4, 136.0, 126.6, 125.3, 125.2, 113.9, 113.6, 104.4, 75.9, 71.1, 61.5, 53.1, 36.1, 34.3, 31.4, 29.9, 28.8, 19.5, 17.9, 14.3; IR cm<sup>-1</sup> (neat) : 3323, 2959, 2922, 2852, 1737, 1659, 1517, 1478, 1371, 1335, 1247, 1170, 1070, 1029.; HRMS 526.0117 (M+Na<sup>+</sup>); 526.0141 calcd for C<sub>19</sub>H<sub>25</sub>Br<sub>2</sub>NaN<sub>3</sub>O<sub>3</sub>); [α]<sub>D</sub><sup>22</sup> = -8.3 (c = 0.405, CHCl<sub>3</sub>)

#### Synthesis of indolyl N-BOC protected dipeptide **13c** by selective deprotection of the BOC

group in valine. Di-BOC-protected dipeptide **13a** (0.36 g, 0.52 mmol) was treated with 20 % TFA in CH<sub>2</sub>Cl<sub>2</sub> (5 mL) at 0 °C, and then the reaction mixture was stirred for 12 h at the same temperature. The solvent was evaporated, and the residue was diluted with CH<sub>2</sub>Cl<sub>2</sub> (10 mL) and washed with sat. NaHCO<sub>3</sub> (10 mL). The organic layer was dried over MgSO<sub>4</sub> and evaporated under reduced pressure. The crude product was purified by column chromatography (EtOAc) to get the mono-protected amine **13c** (0.21 g, 67 %) along with some **13b** (71 mg, 30 %). **13c**: <sup>1</sup>H NMR δ (CDCl<sub>3</sub>): 7.72-7.70 (d, 1H, J = 9.2 Hz, NH of amide), 7.47 (s, 1H, Ar), 7.35-7.33 (d, 1H, J = 8.0, Ar), 7.28-7.26 (d, 1H, J = 8.0 Hz, Ar), 5.06 (m, 1H, α-H of Typ.), 4.23-4.17 (q, 2H, J = 7.2 Hz, -OCH<sub>2</sub>CH<sub>3</sub>), 3.65-3.60 (dd, 1H, J = 14.0, 5.2 Hz, benzylic H), 3.42-3.36 (dd, 1H, J = 15.6, 9.6 Hz, benzylic H), 2.76-2.75 (d, 1H, J = 4.8 Hz, α-H of Val.), 2.39 (s, 3H, -NCH<sub>3</sub>), 1.97-1.86 (m, 1H, -CH(CH<sub>3</sub>)<sub>2</sub>), 1.65 (s, 9H, *t*Bu), 1.25-1.22 (t, 3H, J = 7.2 Hz, -OCH<sub>2</sub>CH<sub>3</sub>), 0.85-0.83 (d, 3H, J = 6.8 Hz, -CH(CH<sub>3</sub>)<sub>2</sub>), 0.73-0.72 (d, 3H, J = 6.8 Hz, -CH(CH<sub>3</sub>)<sub>2</sub>); <sup>13</sup>C NMR δ (CDCl<sub>3</sub>): 173.5, 172.0, 147.6, 131.3, 130.4, 129.3, 128.4, 115.8, 113.33, 107.3, 84.86, 70.8, 61.4, 52.1, 36.0, 31.3, 27.9, 19.4, 17.8, 14.1; IR cm<sup>-1</sup> (KBr pellet) : 3326, 2971, 2794, 1737, 1659, 1515, 1459, 1376, 1315, 1238, 1143, 1088, 1016.; HRMS 604.0840 ((M+H<sup>+</sup>)); 604.0841 calcd for C<sub>24</sub>H<sub>33</sub>Br<sub>2</sub>N<sub>3</sub>O<sub>5</sub>).



**General procedure of Buchwald-Hartwig amination for macrocyclization (Table 2).** To a sealable pressure tube, the Pd source (e. g., Pd<sub>2</sub>dba<sub>3</sub>·CHCl<sub>3</sub>, 5-10 mol%), phosphine ligand (10 mol%), and a strong base like NaOtBu (200 mol%) were added to a solution of the starting amine **13c** in toluene or 1,4-dioxane. The vessel was heated to 80 - 100 °C for 4-20 h. The mixture was cooled to RT, and then diluted with water (10 mL) and EtOAc (10 mL). The product was extracted by EtOAc (10 mL x 3), and the combined organic layers were dried over MgSO<sub>4</sub> and evaporated under reduced pressure. The crude product was purified by column chromatography. Results are tabulated in Table 2.

**Table 2.** Attempted Pd-catalyzed Intramolecular *N*-Arylation Reactions

| entry | conditions                                                                                                                                                                    | temp. (°C)<br>time (h) | result       |
|-------|-------------------------------------------------------------------------------------------------------------------------------------------------------------------------------|------------------------|--------------|
| 1     | Pd(OAc) <sub>2</sub> (5 mol%), DPPP (10 mol%), NaO <sup>t</sup> Bu (200 mol%), toluene <sup>a</sup>                                                                           | 80 °C, 14 h            | --b          |
| 2     | Pd <sub>2</sub> dba <sub>3</sub> ·CHCl <sub>3</sub> (5 mol%), 3-(tol) <sub>3</sub> P (10 mol%), <sup>t</sup> BuONa (200 mol%), toluene                                        | rt, 4 d                | -- b         |
| 3     | Pd(OAc) <sub>2</sub> (3.3 mol%), MOP (10 mol%), Cs <sub>2</sub> CO <sub>3</sub> (200 mol%), toluene <sup>a</sup>                                                              | 100 °C, 20 h           | sm recovered |
| 4     | Pd <sub>2</sub> dba <sub>3</sub> ·CHCl <sub>3</sub> (10 mol%), BINAP (10 mol%), <sup>t</sup> BuOK (200 mol%), K <sub>2</sub> CO <sub>3</sub> (200 mol%), toluene <sup>a</sup> | 90 °C, 14 h            | -- b         |
| 5     | Pd <sub>2</sub> dba <sub>3</sub> ·CHCl <sub>3</sub> (8 mol%), BINAP (9 mol%), <sup>t</sup> BuONa (200 mol%), dioxane                                                          | 100 °C, 5 h            | -- b         |

<sup>a</sup> Reaction was performed in sealed tube.

<sup>b</sup> No desired product without any starting material.

**Synthesis of tetracyclic DKP **14** by the Cu-mediated tandem cyclization.** CuI (62 mg, 0.123

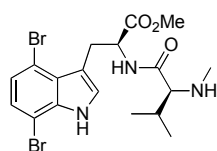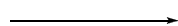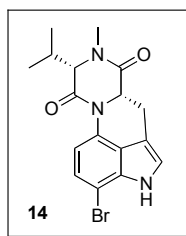

mmol) and CsOAc (60 mg, 0.307 mmol) were added to a 1-neck flask in N<sub>2</sub> charged drybox, and then the vessel was taken out. To the vessel, Free amine **13b** (62 mg, 0.123 mmol) in anhydrous DMSO (1.5

mL) was added. The resulting mixture was heated to 90 °C for 12 h under N<sub>2</sub> atmosphere. After

the starting material was completely consumed, the mixture was cooled to RT, and then diluted with water (10 mL) and EtOAc (10 mL). The product was extracted by EtOAc (10 mL x 3), and the combined organic layer was dried over MgSO<sub>4</sub> and evaporated under reduced pressure. The crude product was purified by preparative TLC (67% EtOAc in *n*-Hex.) to get 29.3 mg (63 %) of **14** and 4.8 mg (10 %) of an unidentified compound. Pure major product **14** was crystallized under ether/EtOAc (2:1) for X-ray crystallography. **14**: <sup>1</sup>H NMR δ (CDCl<sub>3</sub>): 8.15 (br s, 1H, *NH* of indole), 7.78-7.74 (d, *J* = 8.0 Hz, Ar), 7.33-7.29 (d, *J* = 8.3 Hz, Ar), 6.97 (s, 1H, Ar), 4.50-4.44 (dd, 1H, *J* = 12.2, 3.0 Hz, Benzylic), 4.04-4.03 (d, 1H, *J* = 3.7 Hz, α-H of *Typ.*), 3.80-3.72 (dd, 1H, *J* = 15.7, 3.2 Hz, Benzylic), 3.16-3.08 (m, 4H, -NCH<sub>3</sub> & α-H of Val.), 2.35-2.28 (m, 1H, -CH(CH<sub>3</sub>)<sub>2</sub>), 1.16-1.13 (d, 3H, *J* = 7.0 Hz, -CH(CH<sub>3</sub>)<sub>2</sub>), 0.88-0.86 (d, 3H, *J* = 6.2 Hz, -CH(CH<sub>3</sub>)<sub>2</sub>); <sup>13</sup>C NMR δ (CDCl<sub>3</sub>): 165.5, 163.6, 133.6, 130.5, 125.6, 122.0, 118.7, 113.8, 110.1, 100.3, 68.4, 60.2, 34.5, 32.4, 29.1, 19.8, 18.2; IR cm<sup>-1</sup> (KBr pellet): 3299, 2922, 1650, 1494, 1402, 1344, 1292, 1260, 1080.; HRMS 376.0644 ((*M*+H<sup>+</sup>); 376.0661 calcd for C<sub>17</sub>H<sub>19</sub>BrN<sub>3</sub>O<sub>2</sub>); [α]<sub>D</sub><sup>22</sup> = -51.1 (*c* = 0.355, CHCl<sub>3</sub>)

**Synthesis of (*S*)-*N*-BOC-valinyl 2-bromophenylalanyl ethyl ester (**19**) using Horner-Emmons reaction followed by hydrogenation. (a) Synthesis of dehydrodipeptide substrate**

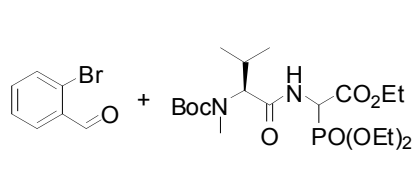

**18.** After 2-bromobenzaldehyde (0.5 g, 2.7 mmol) and Schmidt's phosphonate **11** (1.25 g, 2.7 mmol) in anhydrous CH<sub>2</sub>Cl<sub>2</sub> were treated

with DBU (0.41 mL, 0.54 mmol) at 0 °C, the resulting mixture was stirred for 1 d at RT. The solvent was evaporated, and the crude product was purified by column chromatography (10 % to 20 % EtOAc in hexane.) to get 0.85 g (65 %) of the dehydrodipeptide **18**. <sup>1</sup>H NMR δ (CDCl<sub>3</sub>): 7.76 (br s, 1H, *CH* in enamide), 7.54-7.52 (d, 1H, *J* = 8.0 Hz, Ar), 7.40 (s, 1H, *NH*), 7.33-7.32 (d, 1H, *J* = 7.2 Hz, Ar), 7.17-7.14 (t, 1H, *J* = 7.2 Hz, Ar), 7.10-7.06 (m, 1H, Ar), 4.27-4.22 (q, 2H, 6.8 Hz, -OCH<sub>2</sub>CH<sub>3</sub>), 4.09-4.06 (d, 1H, *J* = 11.2 Hz, α-H of Val.), 2.65 (s, 3H, -NCH<sub>3</sub>), 2.20-2.06 (m, 1H, -CH(CH<sub>3</sub>)<sub>2</sub>), 1.41 (s, 9H, *t*Bu), 1.30-1.27 (t, 3H, *J* = 7.1 Hz, -OCH<sub>2</sub>CH<sub>3</sub>), 0.85-0.83 (d, 3H, *J* = 6.4 Hz, -CH(CH<sub>3</sub>)<sub>2</sub>), 0.79-0.77 (d, 3H, *J* = 6.4 Hz, -CH(CH<sub>3</sub>)<sub>2</sub>); <sup>13</sup>C NMR δ (CDCl<sub>3</sub>): 168.6, 164.5; 157.1, 134.9, 133.0, 130.2, 130.1, 129.5, 127.1, 126.1, 124.4, 80.6, 64.5, 61.9, 30.2, 28.5, 25.9, 19.6, 18.5, 14.3; IR cm<sup>-1</sup> (neat): 3277, 2973, 2932, 2874, 1725, 1666, 1480, 1392, 1368, 1296, 1256, 1153, 1100, 1026.; HRMS 483.1472 ((*M*+H<sup>+</sup>); 483.1495 calcd for

C<sub>22</sub>H<sub>32</sub>BrN<sub>2</sub>O<sub>5</sub>).

**(b) Synthesis of dipeptide 19 using Rh-catalyzed asymmetric hydrogenation of 18 (entry 3,**

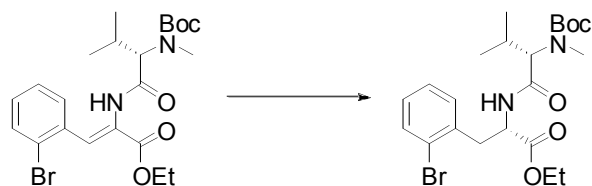

**Table 3).**<sup>3a</sup> To a high-pressure Parr reactor, enamide **18** (0.36 g, 0.74 mmol), {Rh[[2,3-D-glucosyl-1,2-diarylphosphinite][NBD]]<sup>+</sup> BF<sub>4</sub><sup>-2b</sup> (3.9 mg, 0.037 mmol) and anhydrous THF (10 mL)

were added in N<sub>2</sub> charged drybox. The reactor was brought out, and set up in a fume hood. The reactor was evacuated and refilled 3 times, and finally pressurized to 90 psi. The mixture was stirred for 4 d at RT. After the pressure was released, the solvent was evaporated, and the crude product was purified by column chromatography (20 % EtOAc in *n*-Hex.) to yield 0.36 g (conv. > 99 %, *SS:RS* = 6.8:1, based on <sup>1</sup>H NMR) of the 2-Br-Phe-Val derivative **19**. <sup>1</sup>H NMR δ (CDCl<sub>3</sub>): 7.47-7.45 (d, 1H, *J* = 8.0 Hz, Ar), 7.15-7.10 (m, 2H, Ar), 7.04-7.00 (m, 1H, Ar), 6.58 (br s, 1H, NH), 4.85-4.84 (br d, 1H, 6.8 Hz, α-H of Tyr.), 4.13-3.99 (m, 3H, -OCH<sub>2</sub>CH<sub>3</sub>, & α-H of Val.), 3.29-3.24 (dd, 1H, *J* = 14.0, 5.6 Hz, benzylic), 3.06-2.98 (br m, 1H, Benzylic), 2.67 (s, 3H, -NCH<sub>3</sub>, minor isomer), 2.53 (s, 3H, -NCH<sub>3</sub>, major isomer), 2.17-2.06 (m, 1H, -CH(CH<sub>3</sub>)<sub>2</sub>), 1.42 (s, 9H, *t*Bu), 1.19-1.14 (t, 3H, *J* = 7.0 Hz, -OCH<sub>2</sub>CH<sub>3</sub>), 0.85-0.83 (d, 3H, *J* = 6.4 Hz, -CH(CH<sub>3</sub>)<sub>2</sub>), 0.77-0.75 (d, 3H, *J* = 6.4 Hz, -CH(CH<sub>3</sub>)<sub>2</sub>); <sup>13</sup>C NMR δ (CDCl<sub>3</sub>): 171.1, 170.1, 156.7, 136.1, 132.9, 131.2, 128.5, 127.3, 124.9, 80.1, 64.4, 61.4, 60.3, 51.7, 38.4, 29.9, 28.4, 26.0, 21.0, 19.7, 18.4, 14.0; IR cm<sup>-1</sup> (neat): 3330, 3058, 2964, 2870, 1740, 1677, 1510, 1469, 1442, 1369, 1333, 1307, 1155, 1030.; HRMS 485.1630 ((M+H<sup>+</sup>); 485.1651 calcd for C<sub>22</sub>H<sub>34</sub>BrN<sub>2</sub>O<sub>5</sub>); [α]<sub>D</sub><sup>22</sup><sub>589nm</sub> = -79.3 (c = 0.75, CHCl<sub>3</sub>).

Results of hydrogenation using other catalysts are summarized in Table 3.

**Table 3.** Rh-catalyzed asymmetric hydrogenations of Z-dehydro-dipeptide **18**<sup>a</sup>

| entry | ligand                                                                                                       | condition                                | yield (dr) <sup>b</sup>                      |
|-------|--------------------------------------------------------------------------------------------------------------|------------------------------------------|----------------------------------------------|
| 1     | 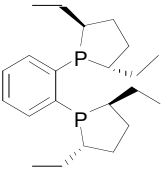                            | cat. 5 mol%,<br>MeOH<br>60 psi, rt, 24 h | 100 %<br>(SS/SR =<br>3.6:1.0)                |
| 2     | <br>Ar = 3,5 dimethylphenyl | cat. 5 mol%,<br>THF<br>40 psi, rt, 24 h  | 38%<br>(SS/SR =<br>10:1.0)                   |
| 3     |                                                                                                              | cat. 5 mol%,<br>THF<br>60 psi, rt, 48 h  | <b>100 %</b><br><b>(SS/SR =<br/>6.8:1.0)</b> |

<sup>a</sup> High pressure Paar hydrogenator was used.<sup>b</sup> Selectivities were determined by <sup>1</sup>H NMR.**Dipeptide *N*-Val-2-Br-Phe-OEt (**20**) via deprotection of the BOC group from **19**.** *N*-BOC-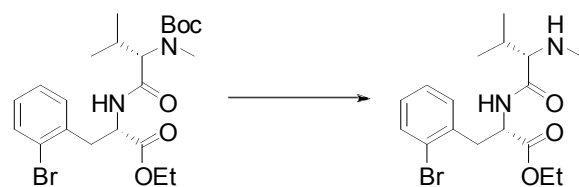

protected dipeptide **19** (0.16 g, 0.33 mmol) was treated with 30 % TFA in CH<sub>2</sub>Cl<sub>2</sub> (5 mL), and then the reaction mixture was stirred overnight at RT. After the starting BOC-derivative was

consumed completely, the mixture was evaporated. The residue was diluted with CH<sub>2</sub>Cl<sub>2</sub> (10 mL) and washed with sat. NaHCO<sub>3</sub> (10 mL). The organic layer was dried over MgSO<sub>4</sub> and evaporated under reduced pressure. The crude product was purified by column chromatography (EtOAc) to get 0.13 g (> 99 %) of the desired dipeptide (**20**). <sup>1</sup>H NMR δ (CDCl<sub>3</sub>): 7.66-7.64 (d, 1H, J = 8.8 Hz, NH), 7.52-7.50 (d, 1H, J = 8.0 Hz, Ar), 7.28-7.26 (d, 1H, J = 8.0 Hz, Ar), 7.23-7.19 (t, 1H, J = 6.8 Hz, Ar), 7.08-7.05 (t, 1H, J = 6.8 Hz, Ar), 4.96-4.93 (m, 1H, α-H of Tyr.), 4.19-4.14 (q, 2H, J = 7.2 Hz, -OCH<sub>2</sub>CH<sub>3</sub>), 3.35-3.30 (dd, 1H, J = 14.0, 5.6 Hz, benzylic), 3.19-3.13 (dd, 1H, J = 14.4, 10.0 Hz, Benzylic), 2.73- 2.72 (d, 1H, J = 4.8 Hz, α-H of Val.), 2.34 (s, 3H, -NCH<sub>3</sub>), 1.95-1.83 (m, 1H, -CH(CH<sub>3</sub>)<sub>2</sub>), 0.94-0.93 (d, 3H, J = 7.0 Hz, -CH(CH<sub>3</sub>)<sub>2</sub>, minor isomer (*RS*)), 0.88-0.86 (d, 3H, J = 7.0 Hz, -CH(CH<sub>3</sub>)<sub>2</sub>, minor isomer (*RS*)), 0.80-0.78 (d, 3H, J = 6.8 Hz, -CH(CH<sub>3</sub>)<sub>2</sub>, major isomer (*SS*)), 0.73-0.71 (d, 3H, J = 6.8 Hz, -CH(CH<sub>3</sub>)<sub>2</sub>, major isomer (*SS*)); <sup>13</sup>C NMR δ (CDCl<sub>3</sub>): 173.5, 171.8, 136.4, 133.0, 131.3, 128.7, 127.6, 125.1, 70.9, 70.5, 61.6, 53.6, 51.9, 38.1, 36.1, 35.9, 31.3, 19.4, 18.1, 14.2; IR cm<sup>-1</sup> (neat): 3319, 3055, 2964, 2801, 1736, 1655, 1513, 1473, 1437, 1366, 1199, 1133, 1026.

**Synthesis of 2-bromophenylalanine (23a) using Schöllkopf reagent.**<sup>7</sup> *n*-BuLi (3.7 ml, 5.43

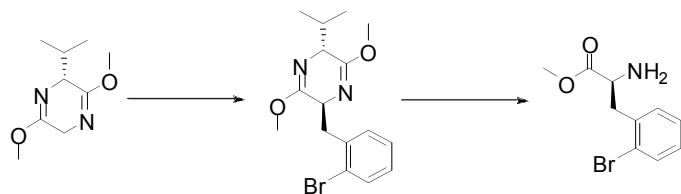

mmol, 1.47 M in hexane) was added dropwise to the solution of Schöllkopf reagent (1.0 g, 5.43 mmol) in anhydrous THF (5 mL) at -78 °C under N<sub>2</sub>. The resulting solution was stirred additional

20 min. A solution of 2-bromobenzyl bromide (1.29 g, 5.43 mmol) was added to the mixture over 5 min periods, and the resulting mixture was stirred for 3 h at -78 °C. After the reaction was quenched with sat. NH<sub>4</sub>Cl (5 mL), the reaction was warmed up to RT, and diluted with EtOAc (20 mL) and water (10 mL). The crude product was extracted with EtOAc (3 x 20 mL), and combined organic phase was dried over MgSO<sub>4</sub>. After volatiles were evaporated, the crude product was purified by column chromatography (5 % EtOAc in hexane.). 1.7 g (93 %) of desired alkylated compound **22a** was obtained. <sup>1</sup>H NMR δ (CDCl<sub>3</sub>): 7.51-7.50 (d, 1H, J = 7.5 Hz, Ar), 7.21-7.16 (m, 2H, Ar), 7.05-7.02 (m, 1H, Ar), 4.33-4.30 (m, 1H, α-H of Tyr.), 3.71 (s, 3H, OCH<sub>3</sub>), 3.66-3.65 (t, 1H, J = 3.5 Hz, α-H of Val.), 3.62 (s, 3H, OCH<sub>3</sub>), 3.47-3.43 (dd, 1H, J = 13.8, 4.8 Hz, benzylic), 2.95-2.90 (dd, 1H, J = 13.8, 8.2 Hz, benzylic), 2.21-2.18 (m, 1H, -CH(CH<sub>3</sub>)<sub>2</sub>), 1.00-0.99 (d, 3H, J = 7.0 Hz, -CH(CH<sub>3</sub>)<sub>2</sub>), 0.65-0.63 (d, 3H, J = 6.5 Hz, -CH(CH<sub>3</sub>)<sub>2</sub>); <sup>13</sup>C NMR δ (CDCl<sub>3</sub>): 163.8, 163.1, 137.9, 132.6, 131.9, 127.9, 126.8, 125.4, 60.5, 55.9, 52.5, 40.3, 31.4, 19.1, 16.6; IR cm<sup>-1</sup> (neat): 3056, 2962, 2870, 1685, 1587, 1461, 1458, 1374, 1239, 1109, 1026.

The alkylated compound **22a** (0.5 g, 1.42 mmol) in CH<sub>3</sub>CN (10 mL) was treated with 0.3 N HCl (10 mL), and the resulting solution was stirred at rt for 30 min. The solution was made basic with sat. NaHCO<sub>3</sub>, and the product was extracted with CH<sub>2</sub>Cl<sub>2</sub> (3 x 20 mL). After drying and evaporation, the product was purified by column chromatography (EtOAc) to yield 0.34 g (92 %) of 2-bromo-*L*-phenylalanine methyl ester **23a**. All spectral data were matched with reported data. <sup>1</sup>H NMR δ (CDCl<sub>3</sub>): 7.58-7.56 (d, 1H, J = 8.0 Hz, Ar), 7.28-7.24 (m, 2H, Ar), 7.15-7.10 (m, 1H, Ar), 3.90 (br s, 1H, α-H of Tyr.), 3.73 (s, 3H, OCH<sub>3</sub>), 3.30-3.26 (dd, 1H, J = 13.4, 5.4 Hz, benzylic), 2.97-2.92 (dd, 1H, J = 13.6, 8.8 Hz, benzylic).

**Synthesis of *o*-iodo phenylalanine (23b) using Schöllkopf reagent.**<sup>7</sup> Using the same procedure

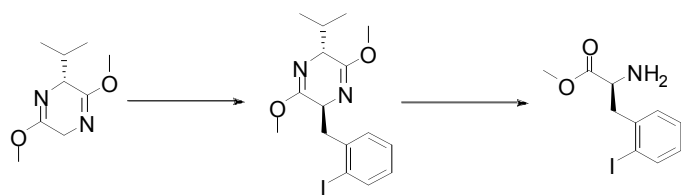

as in the previous experiment, but with 2-iodobenzyl bromide (0.385 g, 1.3 mmol), 0.388 g (75 %) of desired alkylated compound **22b** was obtained. <sup>1</sup>H NMR  $\delta$

(CDCl<sub>3</sub>): 7.80-7.79 (d, 1H, *J* = 7.5 Hz, Ar), 7.24-7.19 (m, 2H, Ar), 6.88-6.84 (m, 1H, Ar), 4.30-4.27 (m, 1H,  $\alpha$ -H of Tyr.), 3.72-3.71 (4H, OCH<sub>3</sub> &  $\alpha$ -H of Val.), 3.63 (s, 3H, OCH<sub>3</sub>), 3.44-3.40 (dd, 1H, *J* = 13.8, 4.8 Hz, benzylic), 2.95-2.91 (dd, 1H, *J* = 13.8, 7.8 Hz, benzylic), 2.22-2.19 (m, 1H, -CH(CH<sub>3</sub>)<sub>2</sub>), 1.01-1.00 (d, 3H, *J* = 7.0 Hz, -CH(CH<sub>3</sub>)<sub>2</sub>), 0.66-0.64 (d, 3H, *J* = 6.5 Hz, -CH(CH<sub>3</sub>)<sub>2</sub>); <sup>13</sup>C NMR  $\delta$  (CDCl<sub>3</sub>): 163.9, 163.2, 141.4, 139.5, 131.1, 128.2, 127.9, 102.0, 60.7, 56.3, 52.8, 52.7, 45.0, 31.6, 19.3, 16.8; IR cm<sup>-1</sup> (neat): 3222, 2969, 1722, 1681, 1585, 1462, 1373, 1342, 1215, 1168, 1014.

The alkylated compound **22b** (0.24 g, 0.601 mmol) in CH<sub>3</sub>CN (10 mL) was treated with 0.3 N HCl (5 mL), and the resulting solution was stirred at rt for 30 min. The solution was made basic with sat. NaHCO<sub>3</sub>, and the product was extracted with CH<sub>2</sub>Cl<sub>2</sub> (3 x 20 mL). After drying and evaporation, the product was purified by column chromatography (EtOAc) to get 0.184 g of the mixture of 2-iodo-*L*-phenylalanine methyl ester **23b** (85 %) with valine methyl ester (15 %). This mixture was used for a coupling reaction without further purification. All spectral data were matched with reported data. <sup>1</sup>H NMR  $\delta$  (CDCl<sub>3</sub>): 7.86-7.85 (d, 1H, *J* = 7.8 Hz, Ar), 7.31-7.28 (m, 1H, Ar), 7.24-7.22 (dd, 1H, *J* = 7.8, 1.8 Hz, Ar), 6.96-6.92 (m, 1H, Ar), 3.86-3.83 (dd, 1H, *J* = 8.2, 4.2 Hz,  $\alpha$ -H of Tyr.), 3.73 (s, 3H, OCH<sub>3</sub>), 3.27-3.23 (dd, 1H, *J* = 13.8, 4.2 Hz, benzylic), 2.95-2.90 (dd, 1H, *J* = 13.5, 8.0 Hz, benzylic); <sup>13</sup>C NMR  $\delta$  (CDCl<sub>3</sub>): 175.4, 140.5, 139.9, 130.9, 128.8, 128.4, 101.1, 54.8, 52.2, 45.9.

**Synthesis of dipeptide 25b using a peptide coupling reaction, followed by deprotection.** To

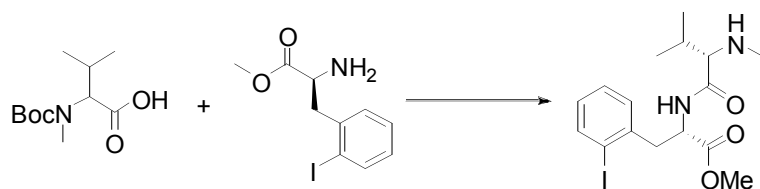

a stirred solution of *N*-Boc, *N*-Me-*L*-valine (52 mg, 0.224 mmol), 2-iodo-*L*-phenylalanine methyl ester (57 mg, 0.187 mmol), and DIEA

(79  $\mu$ L, 0.449 mmol) in anhydrous CH<sub>2</sub>Cl<sub>2</sub> (3 mL) was added HBTU (72 mg, 0.224 mmol), and the resulting solution was stirred for 12 h at RT. After the solvent was evaporated, the crude product was purified by column chromatography (10 to 20 % EtOAc in hexane) to get 95 mg (98

%) of the dipeptide **24b**.  $^1\text{H}$  NMR  $\delta$  ( $\text{CDCl}_3$ ): 7.79-7.77 (d, 1H,  $J = 7.6$  Hz, Ar), 7.49 (br s, 1H, Ar), 7.11-7.09 (d, 1H,  $J = 7.2$  Hz, Ar), 6.90-6.86 (t, 1H,  $J = 7.6$  Hz, Ar), 6.55 (br s, 1H, NH), 4.88 (br s, 1H,  $\alpha$ -H of Tyr.), 4.10-3.99 (d, 1H,  $J = 10.8$  Hz,  $\alpha$ -H of Val.), 3.69 (s, 3H,  $-\text{OCH}_3$ ) 3.30-3.25 (dd, 1H,  $J = 14.0, 5.6$  Hz, benzylic), 3.06-2.98 (br d, 1H,  $J = 6.0$  Hz, Benzylic), 2.54 (s, 3H,  $-\text{NCH}_3$ ), 2.20-2.10 (m, 1H,  $-\text{CH}(\text{CH}_3)_2$ ), 1.44 (s, 9H,  $t\text{Bu}$ ), 0.87-0.85 (d, 3H,  $J = 6.4$  Hz,  $-\text{CH}(\text{CH}_3)_2$ ), 0.79-0.78 (d, 3H,  $J = 6.4$  Hz,  $-\text{CH}(\text{CH}_3)_2$ );  $^{13}\text{C}$  NMR  $\delta$  ( $\text{CDCl}_3$ ): 171.7, 170.3, 157.0, 139.9, 139.4, 130.5, 128.8, 128.4, 101.1, 80.36, 64.7, 52.6, 51.9, 43.1, 30.2, 28.6, 26.1, 19.8, 18.6;  $[\alpha]_{\text{D}}^{22} = -74.4$  ( $c = 1.285$ ,  $\text{CHCl}_3$ ).

The resulting compound **24b** (85 mg, 0.164 mmol) was treated with by 30 % TFA in  $\text{CH}_2\text{Cl}_2$  (5 mL), and then the reaction mixture was stirred at RT for 8 h. After the starting BOC derivative was consumed completely, the mixture was evaporated. The residue was diluted with  $\text{CH}_2\text{Cl}_2$  (10 mL) and washed with sat.  $\text{NaHCO}_3$  (10 mL). The organic layer was dried over  $\text{MgSO}_4$  and evaporated under reduced pressure. The crude product was purified by column chromatography (EtOAc) to yield 67.2 mg (98 %) of the desired amine **25b**.  $^1\text{H}$  NMR  $\delta$  ( $\text{CDCl}_3$ ): 7.78-7.77 (d, 1H,  $J = 8.0$  Hz, Ar), 7.59-7.57 (d, 1H,  $J = 8.5$  Hz, NH), 7.24-7.22 (m, 2H, Ar), 6.89-6.85 (m, 1H, Ar), 4.95-4.91 (m, 1H,  $\alpha$ -H of Tyr.), 3.71 (s, 3H,  $-\text{OCH}_3$ ), 3.34-3.30 (dd, 1H,  $J = 14.0, 6.0$  Hz, benzylic), 3.14-3.09 (dd, 1H,  $J = 14.0, 10.0$  Hz, Benzylic), 2.69-2.68 (d, 1H,  $J = 5.0$  Hz,  $\alpha$ -H of Val.), 2.33 (s, 3H,  $-\text{NCH}_3$ ), 1.88-1.84 (m, 1H,  $-\text{CH}(\text{CH}_3)_2$ ), 0.77-0.76 (d, 3H,  $J = 7.0$  Hz,  $-\text{CH}(\text{CH}_3)_2$ ), 0.69-0.67 (d, 3H,  $J = 7.0$  Hz,  $-\text{CH}(\text{CH}_3)_2$ );  $^{13}\text{C}$  NMR  $\delta$  ( $\text{CDCl}_3$ ): 173.7, 172.4, 139.8, 130.4, 128.9, 128.6, 101.4, 71.1, 52.6, 52.1, 42.7, 36.1, 31.5, 19.5, 18.1.

**General procedure of Cu-mediated tandem cyclizations (Table 1 in the article).** Copper iodide (100 mol%) and CsOAc (250 mol%) were added to a 1-neck rb-flask in a  $\text{N}_2$  charged drybox, and then the vessel was taken out. To the vessel, free amine (100 mol%) in anhydrous DMSO (1~1.5 mL/0.1 mmol of starting amines) was added. The resulting mixture was heated to 90 °C for 12 h under  $\text{N}_2$  atmosphere. After the starting material was completely consumed, the mixture was cooled to RT, and then diluted with water (10 mL) and EtOAc (10 mL). The product was extracted by EtOAc (10 mL x 3), and the combined organic layer was dried over  $\text{MgSO}_4$  and evaporated under reduced pressure. The crude product was purified by preparative TLC or column chromatography.

### Synthesis of the tricyclic DKP **27** and **28** by Cu-mediated tandem cyclization (entry 3, Table

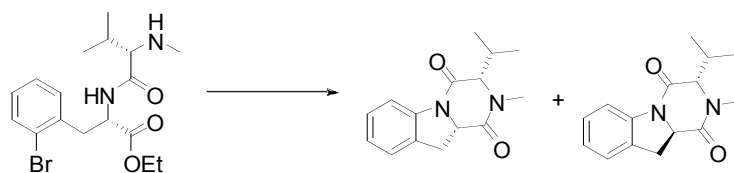

1 in article). Using the general procedure with 25 mg (0.065 mmol) of amine **20** and stoichiometric amount of CuI, (10.0 mg, 59 %) **27**

and **28** (3.1 mg, 18 %) were obtained.

**27**:  $^1\text{H}$  NMR:  $\delta$  ( $\text{CDCl}_3$ ): 8.01-8.00 (d, 1H,  $J = 8.0$  Hz, Ar), 7.28-7.22 (m, 2H, Ar), 7.11-7.08 (t, 1H,  $J = 7.5$  Hz, Ar), 4.74-4.70 (dd, 1H,  $J = 11.2, 9.2$  Hz,  $\alpha$ -H of Tyr.), 4.00-3.99 (d, 1H,  $J = 1.0$  Hz,  $\alpha$ -H of Val.), 3.40-3.28 (m, 2H, , benzylic), 3.04 (s, 3H,  $-\text{NCH}_3$ ), 2.45-2.42 (m, 1H,  $-\text{CH}(\text{CH}_3)_2$ ), 1.24-1.23 (d, 3H,  $J = 7.0$  Hz,  $-\text{CH}(\text{CH}_3)_2$ ), 0.94-0.92 (d, 3H,  $J = 7.0$  Hz,  $-\text{CH}(\text{CH}_3)_2$ );  $^{13}\text{C}$  NMR  $\delta$  ( $\text{CDCl}_3$ ): 166.7, 162.8, 141.5, 130.1, 127.9, 125.2, 124.9, 116.9, 67.5, 60.1, 32.8, 32.7, 30.7, 19.5, 16.3; IR  $\text{cm}^{-1}$  (neat): 2984, 2922, 1668, 1602, 1485, 1421, 1394, 1249, 1092.; HRMS 259.1431 ( $(\text{M}+\text{H}^+)$ ); 259.1447 calcd for  $\text{C}_{15}\text{H}_{19}\text{N}_2\text{O}_2$ ;  $[\alpha]_D^{22} = -71.9$  ( $c = 0.42$ ,  $\text{CHCl}_3$ ).

**28**:  $^1\text{H}$  NMR  $\delta$  ( $\text{CDCl}_3$ ): 8.10-8.09 (d, 1H,  $J = 8.0$  Hz, Ar), 7.27-7.25 (s, 2H, Ar), 7.14-7.11 (t, 1H,  $J = 7.2$  Hz, Ar), 4.91-4.87 (t, 1H,  $J = 10.0$  Hz,  $\alpha$ -H of Tyr.), 3.73-3.71 (d, 1H,  $J = 7.5$  Hz,  $\alpha$ -H of Val.), 3.59-3.54 (dd, 1H,  $J = 16.2, 10.2$  Hz, benzylic), 3.13 (s, 3H,  $-\text{NCH}_3$ ), 2.35-2.21 (m, 1H,  $-\text{CH}(\text{CH}_3)_2$ ), 1.20-1.19 (d, 3H,  $J = 7.0$  Hz,  $-\text{CH}(\text{CH}_3)_2$ ), 1.16-1.15 (d, 3H,  $J = 6.5$  Hz,  $-\text{CH}(\text{CH}_3)_2$ );  $^{13}\text{C}$  NMR  $\delta$  ( $\text{CDCl}_3$ ): 167.4, 164.1, 141.3, 130.0, 128.0, 125.3, 125.0, 116.70, 72.0, 59.6, 35.6, 32.4, 32.1, 20.3, 19.5; IR  $\text{cm}^{-1}$  (neat): 2962, 2924, 1713, 1672, 1601, 1483, 1464, 1390, 1242, 1149, 1049; HRMS 281.1247 ( $(\text{M}+\text{Na}^+)$ ); 281.1266 calcd for  $\text{C}_{15}\text{H}_{18}\text{NaN}_2\text{O}_2$ ;  $[\alpha]_D^{22} = +24.6$  ( $c = 0.570$ ,  $\text{CHCl}_3$ ).

### Synthesis of the tricyclic DKPs **27** and **28** by catalytic amount of Cu-mediated tandem

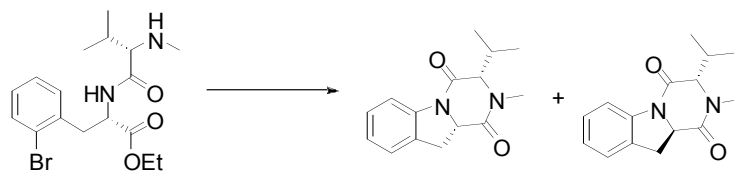

cyclization (entry 4, Table 1 in article). Using the general procedure, 11 mg (0.027 mmol) of amine **20** and catalytic amount of CuI (0.43 mg,

0.0027 mmol) gave **27** (1.2 mg, 20 %) and **28** (4.0 mg, 69 %).

### Synthesis of proline-containing dipeptide **26a** by an aminoacid coupling reaction, and

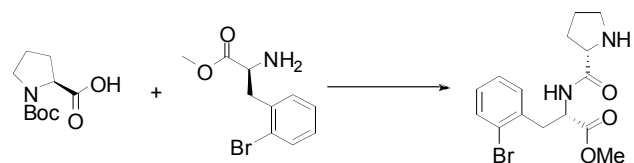

**deprotection to 26b**. To a stirred solution of *N*-Boc-*L*-proline (25 mg, 0.116 mmol), 2-bromo-phenylalanine methyl ester **23a** (20



mg, 0.0077 mmol), and DIEA (40.5  $\mu$ L, 0.233 mmol) in anhydrous  $\text{CH}_2\text{Cl}_2$  (3 mL) was added HBTU (38 mg, 0.116 mmol). The resulting solution was stirred for 12 h at RT. After the solvent was evaporated, the crude product was purified by column chromatography (20 % EtOAc in *n*-Hex.) to yield 35 mg (99 %) of the title compound **26a**.  $^1\text{H}$  NMR  $\delta$  ( $\text{CDCl}_3$ ): 7.51-7.49 (d, 1H,  $J$  = 8.0 Hz, Ar), 7.20-7.18 (2H, Ar), 7.08-7.05 (t, 1H,  $J$  = 6.6 Hz, Ar), 6.59 (br s, 1H, NH), 4.93-4.86 (d, 1H,  $J$  = 6.0 Hz,  $\alpha$ -H of Tyr.), 4.16 (br s, 1H,  $\alpha$ -H of Pro.), 3.70 (s, 3H,  $\text{OCH}_3$ ), 3.33-3.10 (m, 4H, benzylic & N(BOC) $\text{CH}_2\text{R}$  in proline), 2.25-1.72 (m, 4H,  $\text{CHCH}_2\text{CH}_2$  in proline), 1.43 (s, 9H, *t*Bu);  $^{13}\text{C}$  NMR  $\delta$  ( $\text{CDCl}_3$ ): 171.9, 133.1, 131.4, 128.9, 125.3, 52.6, 52.3, 47.3, 28.5;  $[\alpha]_D^{23}$  = -50.7 ( $c$  = 0.38,  $\text{CHCl}_3$ ).

BOC-protected dipeptide **26a** (25 mg, 0.055 mmol) was treated with 30 % TFA in  $\text{CH}_2\text{Cl}_2$  (5 mL), and then the reaction mixture was stirred overnight at rt. After the starting material was consumed completely, the mixture was evaporated. The residue was diluted with  $\text{CH}_2\text{Cl}_2$  (10 mL) and washed with sat.  $\text{NaHCO}_3$  (10 mL). The organic layer was dried over  $\text{MgSO}_4$  and evaporated under reduced pressure. The crude product was purified by column chromatography (only EtOAc) to yield 19.3 mg (> 99 %) of the desired amine **26b**.  $^1\text{H}$  NMR  $\delta$  ( $\text{CDCl}_3$ ): 8.06-8.05 (d, 1H,  $J$  = 8.0 Hz, NH), 7.51-7.50 (d, 1H,  $J$  = 7.5 Hz, Ar), 7.22-7.18 (m, 2H, Ar), 7.08-7.05 (m, 1H, Ar), 4.92-4.87 (m, 1H,  $\alpha$ -H of Tyr.), 3.71 (s, 3H,  $\text{OCH}_3$ ), 3.68-3.65 (m, 1H,  $\alpha$ -H of Pro.), 3.35-3.31 (dd, 2H,  $J$  = 14.0, 6.0 Hz, benzylic), 3.15-3.11 (dd, 2H,  $J$  = 13.8, 8.8 Hz, benzylic), 2.95-2.91 (m, 1H,  $\text{NHCH}_2\text{R}$  in proline), 2.83-2.78 (m, 1H,  $\text{NHCH}_2\text{R}$  in proline), 2.02-1.96 (m, 1H,  $\text{CHCH}_2\text{CH}_2$  in proline) 1.64-1.47 (m, 3H,  $\text{CHCH}_2\text{CH}_2$  in proline);  $^{13}\text{C}$  NMR  $\delta$  ( $\text{CDCl}_3$ ): 175.2, 172.4, 136.3, 133.1, 131.4, 128.8, 127.6, 125.3, 60.5, 52.6, 51.8, 47.4, 38.3, 30.8, 26.2; HRMS 379.0448 ( $(\text{M}+\text{Na}^+)$ ); 379.0458 calcd for  $\text{C}_{15}\text{H}_{19}\text{BrNaN}_2\text{O}_3$ ).

#### Synthesis of the tetracyclic DKPs **29** and **30** by Cu-mediated tandem cyclization.

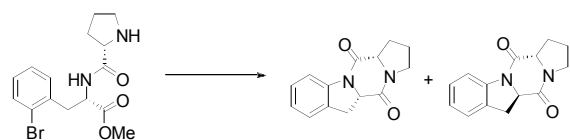

proline amine **26b** (12 mg, 0.0338 mmol) was cyclized to yield the title compounds **29** (3.9 mg, 48%) and 1.0 mg. (12 %) of isomerized product **30**,

using the general procedure (stoichiometric amount of CuI). **29**:  $^1\text{H}$  NMR  $\delta$  ( $\text{CDCl}_3$ ): 8.07-8.05 (d, 1H,  $J$  = 8.0 Hz, Ar), 7.22-7.20 (2H, Ar), 7.09-7.05 (m, 1H, Ar), 4.86-4.82 (t, 1H, 9.8 Hz,  $\alpha$ -H of Tyr.), 4.32-4.29 (t, 1H,  $J$  = 6.8 Hz,  $\alpha$ -H of Pro.), 3.71-3.66 (dd, 1H,  $J$  = 16.8, 9.2 Hz, benzylic), 3.61-3.58 (dd, 2H,  $J$  = 8.2, 5.8 Hz,  $\text{NCH}_2\text{R}$  in proline), 3.38-3.32 (dd, 1H,  $J$  = 16.5, 9.5 Hz, benzylic), 2.40-2.32 (m, 2H,  $\text{CHCH}_2\text{CH}_2$  in proline), 2.05-1.96 (m, 2H,  $\text{CHCH}_2\text{CH}_2$  in

proline);  $^{13}\text{C}$  NMR  $\delta$  ( $\text{CDCl}_3$ ): 165.8, 165.4, 140.9, 130.2, 128.0, 125.2, 125.1, 116.0, 61.6, 61.1, 45.8, 30.5, 27.9, 23.7; IR  $\text{cm}^{-1}$  (neat) : 2959, 2925, 2855, 1666, 1601, 1485, 1462, 1410, 1245, 1215, 1131, 1087.; HRMS 265.0935 ( $\text{M}+\text{Na}^+$ ; calcd for  $\text{C}_{14}\text{H}_{14}\text{NaN}_2\text{O}_2$  265.0953);  $[\alpha]^{22}_{\text{D}} = -10.2$  ( $c = 0.380$ ,  $\text{CHCl}_3$ ).

**30:**  $^1\text{H}$  NMR  $\delta$  ( $\text{CDCl}_3$ ): 8.04-8.03 (d, 1H,  $J = 8.0$  Hz, Ar), 7.28-7.20 (2H, Ar), 7.11-7.08 (t, 1H,  $J = 7.5$  Hz, Ar), 5.15-5.10 (m, 2H,  $\alpha$ -H of Tyr. &  $\alpha$ -H of Pro.), 3.85-3.81 (t, 1H,  $J = 9.0$  Hz, benzylic), 3.61-3.54 (m, 2H,  $\text{NCH}_2\text{R}$  in proline), 3.39-3.33 (m, 1H, benzylic), 2.59-2.45 (m, 1H,  $\text{CHCH}_2\text{CH}_2$  in proline), 3.32-2.18 (m, 2H,  $\text{CHCH}_2\text{CH}_2$  in proline).

**General procedure of demethylations of dimethoxy-2,5-dihydropyrazine to 2,5-diketopiperazine.** To a stirred solution of alkylated dimethoxy-2,5-dihydropyrazine in  $\text{CHCl}_3$  was added TMSI (300 mol%) under  $\text{N}_2$ , and the resulting solution was stirred for 1 h at RT. The reaction was quenched with few drops of MeOH, and then evaporated under reduced pressure. The crude product was purified by recrystallization.

**Synthesis of (3*S*,6*R*)-3-(2-bromobenzyl)-6-isopropylpiperazine-2,5-dione (31a)** Using the

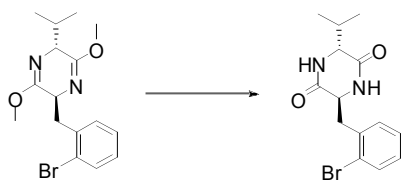

general demethylation procedure with 30 mg (0.0852 mmol) of dimethyl substrate **22a**, 25 mg (90 %) of the title compound **31a** was obtained.  $^1\text{H}$  NMR  $\delta$  ( $\text{DMSO}-d_6$ ): 8.07 (s, 1H, NH of Val.), 7.89-7.88 (d, 1H,  $J = 2.0$  Hz, NH of Tyr.), 7.59-7.58 (d, 1H,  $J = 7.5$  Hz, Ar), 7.33-7.29 (m, 2H, Ar), 7.20-7.17 (m, 1H, Ar), 4.14-4.11 (m, 1H,  $\alpha$ -H of Tyr.), 3.50 (d, 1H,  $J = 1.5$  Hz,  $\alpha$ -H of Val.), 3.34 (s, 3H,  $-\text{NCH}_3$ ), 3.25-3.21 (dd, 1H,  $J = 14.2, 5.2$  Hz, benzylic), 3.11-3.07 (dd, 1H,  $J = 14.0, 7.0$  Hz, benzylic), 2.23-2.217 (m, 1H,  $-\text{CH}(\text{CH}_3)_2$ ), 0.94-0.93 (d, 3H,  $J = 7.0$  Hz,  $-\text{CH}(\text{CH}_3)_2$ ), 0.83-0.82 (d, 3H,  $J = 7.0$  Hz,  $-\text{CH}(\text{CH}_3)_2$ );  $^{13}\text{C}$  NMR  $\delta$

( $\text{DMSO}-d_6$ ): 167.9, 167.3, 136.0, 132.5, 131.8, 128.7, 127.5, 124.6, 58.9, 54.9, 53.9, 38.5, 30.6, 18.2, 16.7; IR  $\text{cm}^{-1}$  (KBr pellet): 3446, 3190, 3056, 2962, 2876, 1673, 1471, 1447, 1346, 1290, 1105, 1028.; HRMS 347.0352 ( $\text{M}+\text{Na}^+$ ); 347.0371 calcd for  $\text{C}_{14}\text{H}_{17}\text{BrNaN}_2\text{O}_2$ );  $[\alpha]^{22}_{\text{D}} = -19.5$  ( $c = 0.465$ , MeOH).

**Synthesis of (3*S*,6*R*)-3-(2-iodobenzyl)-6-isopropylpiperazine-2,5-dione (31b).** Using the

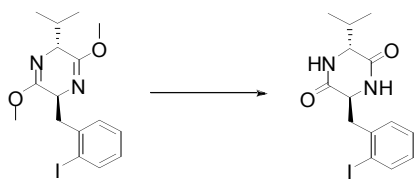

general demethylation procedure with 30 mg (0.0852 mmol) of dimethyl substrate **22b**, 25 mg (90 %) of the title compound **31b** was obtained.  $^1\text{H}$  NMR  $\delta$  ( $\text{DMSO}-d_6$ ): 8.09 (s, 1H, NH of Val.), 7.85-7.84 (2H, NH of Tyr. & Ar), 7.35-7.32 (t, 1H,  $J =$

7.2 Hz, Ar), 7.29-7.27 (q, 1H, J = 6.5 Hz, Ar), 7.01-6.98 (m, 1H, Ar), 4.11-4.09 (t, 1H, J = 4.8 Hz,  $\alpha$ -H of Tyr.), 3.55 (d, 1H, J = 2.5 Hz,  $\alpha$ -H of Val.), 3.30 (s, 3H, -NCH<sub>3</sub>), 3.20-3.16 (dd, 1H, J = 14.0, 5.0 Hz, benzylic), 3.09-3.04 (dd, 1H, J = 14.0, 7.0 Hz, benzylic), 2.22-2.218 (m, 1H, -CH(CH<sub>3</sub>)<sub>2</sub>), 0.95-0.94 (d, 3H, J = 7.0 Hz, -CH(CH<sub>3</sub>)<sub>2</sub>), 0.84-0.83 (d, 3H, J = 7.0 Hz, -CH(CH<sub>3</sub>)<sub>2</sub>); <sup>13</sup>C NMR  $\delta$  (DMSO-d<sub>6</sub>): 167.9, 167.3, 139.2, 130.7, 128.6, 128.2, 60.0, 54.9, 42.8, 30.5, 18.2, 16.7; IR cm<sup>-1</sup> (KBr pellet): 3444, 3190, 3055, 2961, 2874, 1665, 1448, 1384, 1344, 1288, 1105, 1010.

**Synthesis of tricyclic DKP **32** using stoichiometric amount of CuI.** Following the general

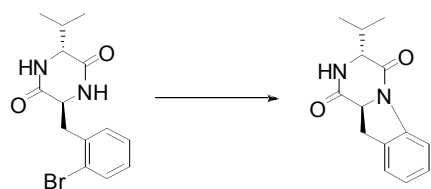

procedure using 30 mg (0.0923 mmol) of bromide substrate **31a** 19.0 mg (84 %) of the title compound **32** and 3.0 mg of isomerized product **33** (13 %) were obtained. **32**: <sup>1</sup>H NMR  $\delta$  (CDCl<sub>3</sub>): 8.16-8.14 (d, 8.0 Hz, 1H, Ar), 7.29-7.26 (m, 2H, Ar), 7.15-7.20 (t, 7.5 Hz, Ar), 7.10 (br s, 1H, NH), 4.89-4.85 (t, J = 10.2 Hz,  $\alpha$ -H of Tyr.), 3.87-

3.85 (dd, J = 6.0, 2.0 Hz, 1H,  $\alpha$ -H of Val.), 3.50-3.46 (dd, J = 16.5, 10.5 Hz, 1H, Benzylic H), 3.42-3.37 (dd, J = 16.0, 10.2 Hz, 1H, Benzylic H), 2.38-2.33 (q, J = 6.5 Hz, 1H, CH<sub>3</sub>CH<sub>2</sub>RCH<sub>3</sub>), 1.16-1.14 (d, J = 6.5 Hz, 3H, CH<sub>3</sub>CH<sub>2</sub>RCH<sub>3</sub>), 1.11-1.10 (d, J = 7.0 Hz, 3H, CH<sub>3</sub>CH<sub>2</sub>RCH<sub>3</sub>); <sup>13</sup>C NMR  $\delta$  (CDCl<sub>3</sub>): 169.3, 164.4, 141.5, 129.5, 128.1, 125.4, 125.0, 64.2, 59.4, 33.2, 32.2, 19.4, 18.3; IR cm<sup>-1</sup> (neat) : 3237, 2965, 2931, 2874, 1681, 1601, 1463, 1417, 1284.; HRMS 267.1093 (M+Na<sup>+</sup>; calcd for C<sub>14</sub>H<sub>16</sub>N<sub>2</sub>O<sub>2</sub>Na 267.1109); [ $\alpha$ ]<sub>D</sub><sup>22</sup> = -14.6 (c = 0.600, CHCl<sub>3</sub>).

**33**: <sup>1</sup>H NMR  $\delta$  (CDCl<sub>3</sub>): 8.12-8.11 (d, 7.5 Hz, 1H, Ar), 7.26-7.22 (m, 2H, Ar), 7.10-7.07 (m, 1H, Ar), 5.93 (br s, 1H, NH), 4.79-4.75 (t, J = 10.0 Hz,  $\alpha$ -H of Tyr.), 4.06-4.05 (d, J = 1.5 Hz, 1H,  $\alpha$ -H of Val.), 3.59-3.54 (dd, J = 10.0, 16.0 Hz, 1H, Benzylic H), 3.39-3.34 (dd, J = 10.0, 16.0 Hz, 1H, Benzylic H), 2.74-2.71 (m, 1H, CH<sub>3</sub>CH<sub>2</sub>RCH<sub>3</sub>), 1.13-1.11 (d, J = 7.5 Hz, 3H, CH<sub>3</sub>CH<sub>2</sub>RCH<sub>3</sub>), 0.99-0.97 (d, J = 7.0 Hz, 3H, CH<sub>3</sub>CH<sub>2</sub>RCH<sub>3</sub>); <sup>13</sup>C NMR  $\delta$  (CDCl<sub>3</sub>): 169.9, 141.3, 129.6, 128.1, 125.2, 116.4, 60.9, 60.1, 31.1, 28.0, 19.6, 16.4.; [ $\alpha$ ]<sub>D</sub><sup>22</sup> = +88.6 (c = 0.150, CHCl<sub>3</sub>).

**Synthesis of tricyclic DKP **32** using catalytic amount of CuI and bromo substrate **31a**.**

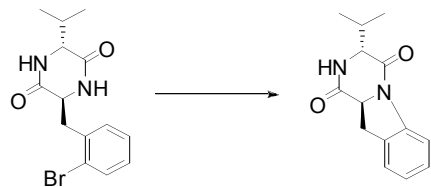

Following the general procedure using 20 mg (0.0615 mmol) of bromo-substrate **31a**, 11.9 mg (79 %) of the title compound **32** and 2.4 mg (16 %) of isomerized product **33** were obtained.

### Synthesis of tricyclic DKP **32** using stoichiometric amount of CuI and iodo-substrate **31b**.

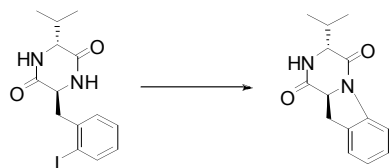

Following the general procedure using 11.8 mg (0.0317 mmol) of iodo-substrate **31b**, 7.8 mg (> 99 %) of the title compound **32** was obtained.

### Synthesis of tricyclic DKP **32** using catalytic amount of CuI and iodo-substrate **31b**.

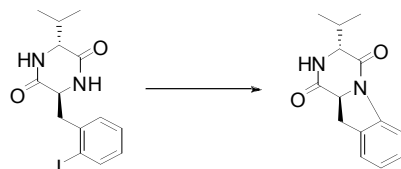

Following the general procedure using 10 mg (0.0267 mmol) of iodo-substrate **31b**, 6.2 mg (95 %) of the title compound **32** and 0.1 mg (1.5 %) of isomerized product **33** were obtained.

### Synthesis of tricyclic DKP *ent*-**28**. To a stirred solution of **32** (5.0 mg, 0.0205 mmol) and MeI

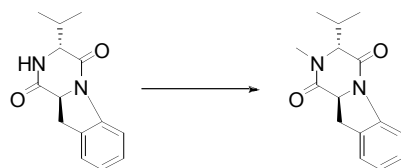

(6.2  $\mu$ L, 0.1 mmol) in THF (2 mL), was added NaH (4.0 mg, 0.1 mmol) at 0 °C. The resulting solution was stirred at RT for 1 h, and then quenched with water. The product was extracted with EtOAc (3 x 5 mL), and combined organics were dried over

MgSO<sub>4</sub>. After the solvent was evaporated, the crude product was purified by prep. TLC to yield the title compound *ent*-**28** (5.3 mg, > 99 %). <sup>1</sup>H NMR  $\delta$  (CDCl<sub>3</sub>): 8.07-8.05 (d, 7.6 Hz, 1H, Ar), 7.22-7.21 (2H, Ar), 7.10-7.06 (t, 7.2 Hz, Ar), 4.87-4.82 (t, J = 10.0 Hz,  $\alpha$ -H of Tyr.), 3.69-3.67 (d, 1H, J = 7.2 Hz,  $\alpha$ -H of Val.), 3.56-3.35 (dd, J = 16.4, 10.0 Hz, benzylic), 3.41-3.44 (dd, J = 16.4, 10.0 Hz, 1H, Benzylic H), 3.08 (s, 3H, NCH<sub>3</sub>), 2.32-2.25 (m, 1H, CH<sub>3</sub>CHRCH<sub>3</sub>), 1.16-1.14 (d, J = 7.2 Hz, 3H, CH<sub>3</sub>CHRCH<sub>3</sub>), 1.12-1.11 (d, J = 6.8 Hz, 3H, CH<sub>3</sub>CHRCH<sub>3</sub>); <sup>13</sup>C NMR  $\delta$  (CDCl<sub>3</sub>): 167.2, 163.8, 141.1, 129.8, 127.8, 125.1, 124.8, 116.5, 71.9, 67.1, 59.4, 35.3, 32.2, 32.0, 20.1, 19.3; IR cm<sup>-1</sup> (neat) : 2930, 2922, 1667, 1601, 1483, 1402, 1241, 1110, 1050.; HRMS 281.1248 ((M+Na<sup>+</sup>); 281.1266 calcd for C<sub>15</sub>H<sub>18</sub>NaN<sub>2</sub>O<sub>2</sub>); [ $\alpha$ ]<sub>D</sub><sup>22</sup> = -49.1 (c = 0.285, CHCl<sub>3</sub>).

## REFERENCES

- (1) Burk, M. J.; Feaster, J. E.; Nugent, W. A.; Harlow, R. L. *J. Am. Chem. Soc.* **1993**, *115*, 10125.
- (2) Chen, J.; Corbin, S. P.; Holman, N. J. *Org. Proc. Res. Dev.* **2005**, *9*, 185.
- (3) (a) [*bis*-2,5-diphenylphosphino]hexane]Rh<sup>+</sup> (Supporting Information, Table 1); Yan, Y. Y.;

- RajanBabu, T. V. *Org. Lett.* **2000**, 2, 4137. [D-Glucose derived ligand]Rh<sup>+</sup> (Scheme 3, Supporting Information Table 3): (b) T. V. RajanBabu, T. A. Ayers, G. A. Halliday, K. K. You, J. C. Calabrese, *J. Org. Chem.* **1997**, 62, 6012.
- (4) Xia, Z.; Smith, C. D. *J. Org. Chem.* **2001**, 66, 3459
- (5) (a) Buck, R. T.; Clarke, P. A.; Coe, D. M.; Drysdale, M. J.; Ferris, L.; Haigh, D.; Moody, C. J.; Pearson, N. D.; Swann, E. *Chem. Eur. J.* **2000**, 6, 2160. (b) Bentley, D. J.; Slawin, A. M. Z.; Moody, C. J. *Org. Lett.* **2006**, 8, 1975.
- (6) Schmidt, U.; Griesser, H.; Leitenberger, V.; Lieberknecht, A.; Mangold, R.; Meyer, R.; Riedl, B. *Synthesis* **1992**, 487.
- (7) (a) Schöllkopf, U.; Groth, U.; Deng, C. *Synthesis*, **1981**, 737. (b) Hinterding, K.; Albert, R.; Cottens, S. *Tetrahedron Lett.* **2002**, 43, 8095.

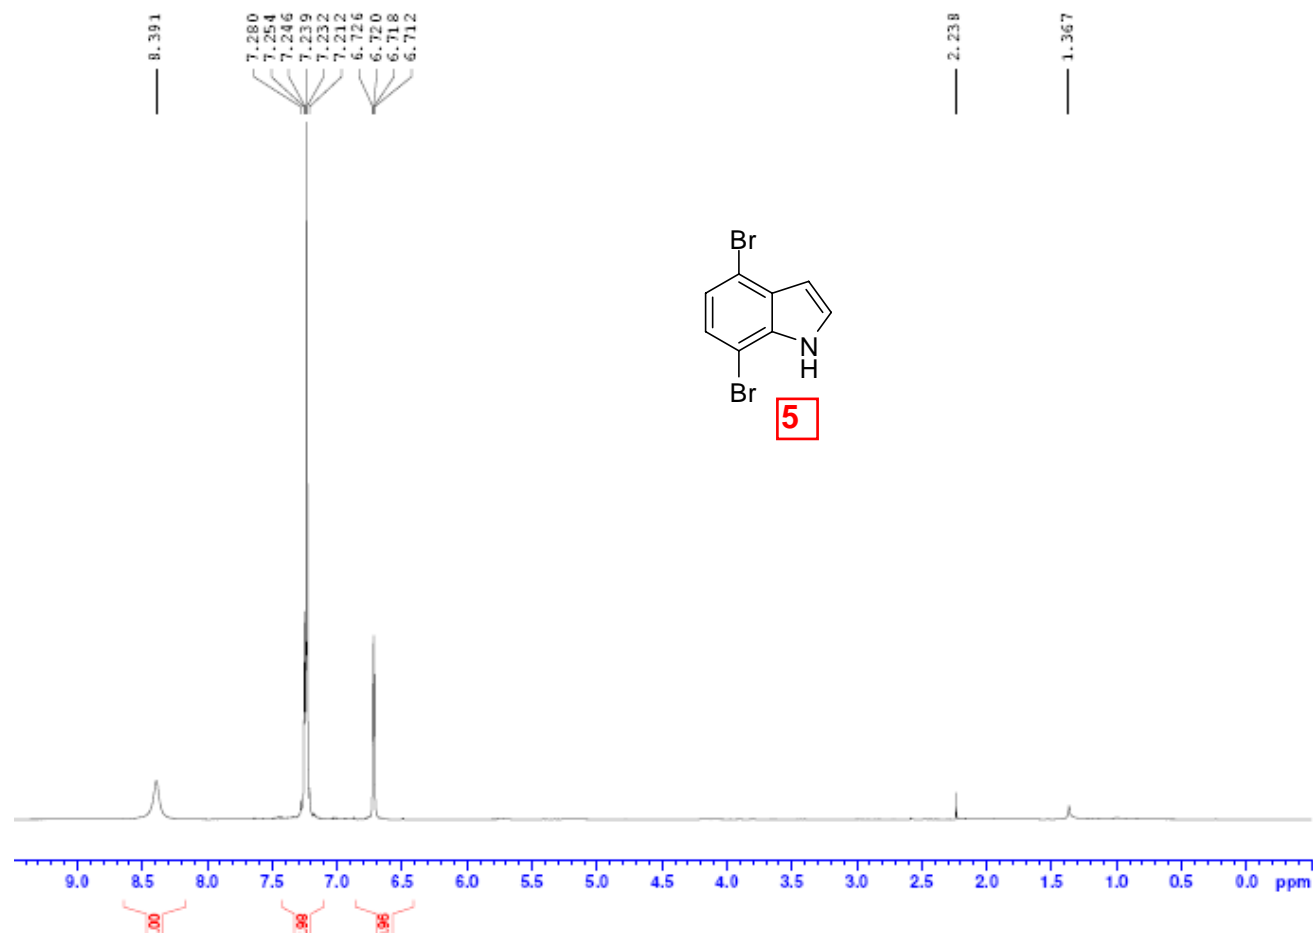

Current Data Parameters  
NAME hlm-A23-A01  
EXPNO 1  
PROCNO 1

F2 - Acquisition Parameters  
Date\_ 20060512  
Time 14.00  
INSTRUM spect  
PROBHD 5 mm Multinucl  
PULPROG zg30  
TD 65536  
SOLVENT CDCl3  
NS 16  
DS 2  
SWH 8278.146 Hz  
FIDRES 0.126314 Hz  
AQ 3.9584243 sec  
RG 35.9  
DM 60.400 usec  
DE 6.00 usec  
TE 300.2 K  
DL 1.00000000 sec  
MCREST 0.00000000 sec  
MCMRK 0.01500000 sec

----- CHANNEL f1 -----  
NUC1 1H  
P1 7.50 usec  
PL1 -6.00 dB  
SFO1 400.1324710 MHz

F2 - Processing parameters  
SI 32768  
SF 400.1300000 MHz  
WDW EM  
SSB 0  
LB 0.30 Hz  
GB 0  
PC 1.00

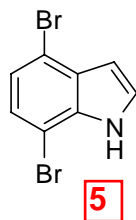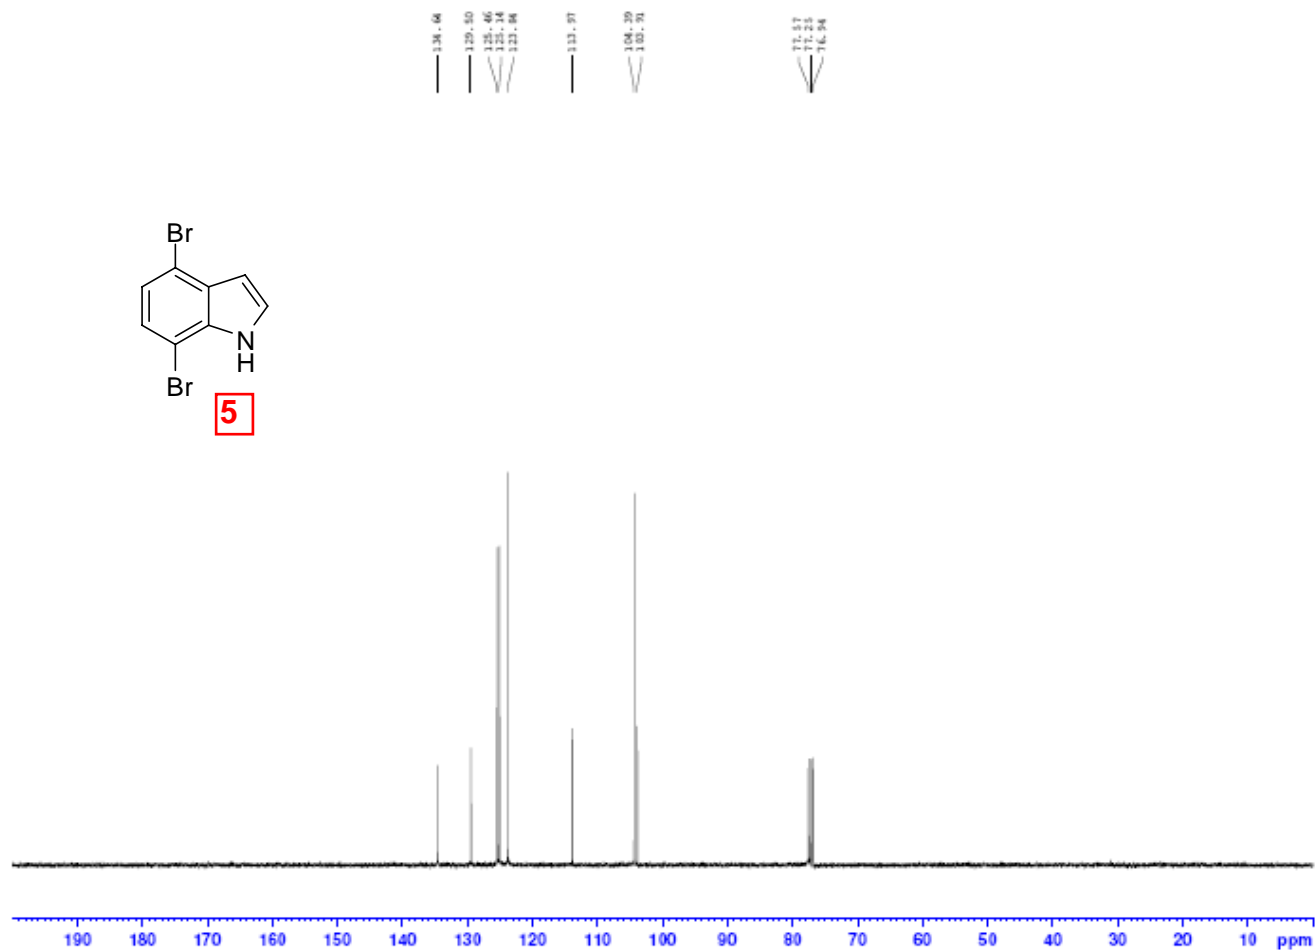

Current Data Parameters  
NAME him-A23-A01-C  
EXPNO 1  
PROCNO 1

F2 - Acquisition Parameters  
Date\_ 20060512  
Time 14.04  
INSTRUM spect  
PROBHD 5 mm Multinucl  
PULPROG zgpg30  
TD 65536  
SOLVENT CDCl3  
NS 84  
DS 4  
SWH 23980.814 Hz  
FIDRES 0.365918 Hz  
AQ 1.3664756 sec  
RG 9195.2  
DM 20.850 use  
DE 6.00 use  
TE 300.2 K  
D1 2.00000000 sec  
d11 0.03000000 sec  
DELTA 1.89999998 sec  
MCREST 0.00000000 sec  
MCWRK 0.01500000 sec

===== CHANNEL f1 =====  
NUC1 13C  
P1 5.90 use  
PL1 -6.00 dB  
SFO1 100.6228298 MHz

===== CHANNEL f2 =====  
CPDPRG2 waltz16  
NUC2 1H  
PCPD2 80.00 use  
PL2 -6.00 dB  
PL12 15.80 dB  
PL13 120.00 dB  
SFO2 400.1316005 MHz

F2 - Processing parameters  
SI 32768  
SF 100.6127690 MHz  
WDW EM  
SSB 0  
LB 1.00 Hz  
GB 0  
PC 1.40

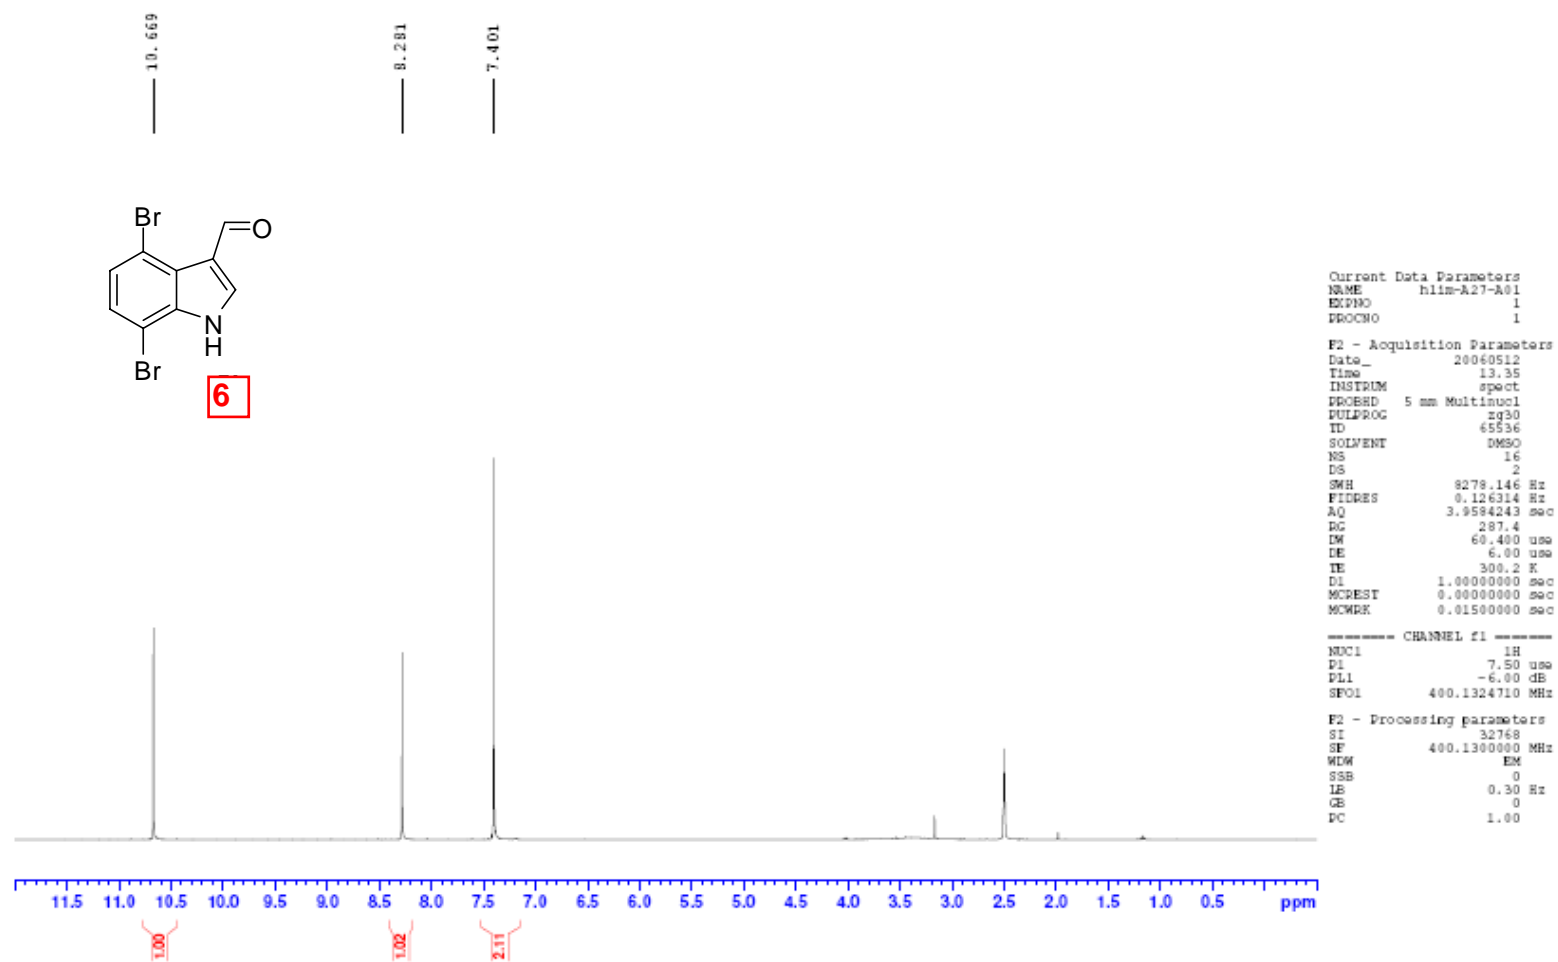



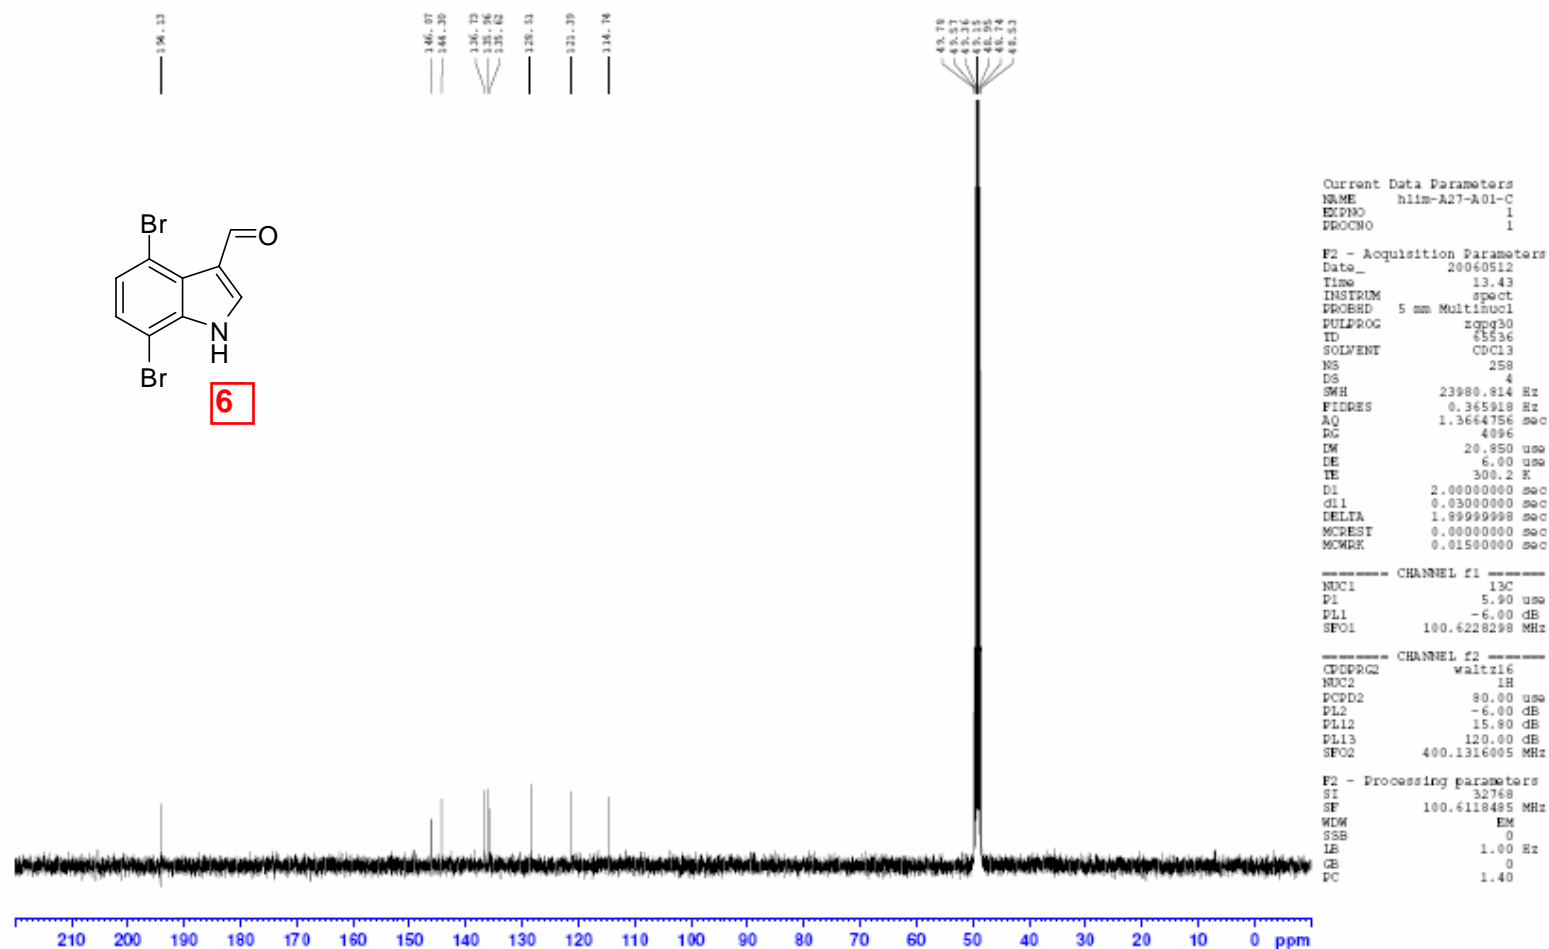

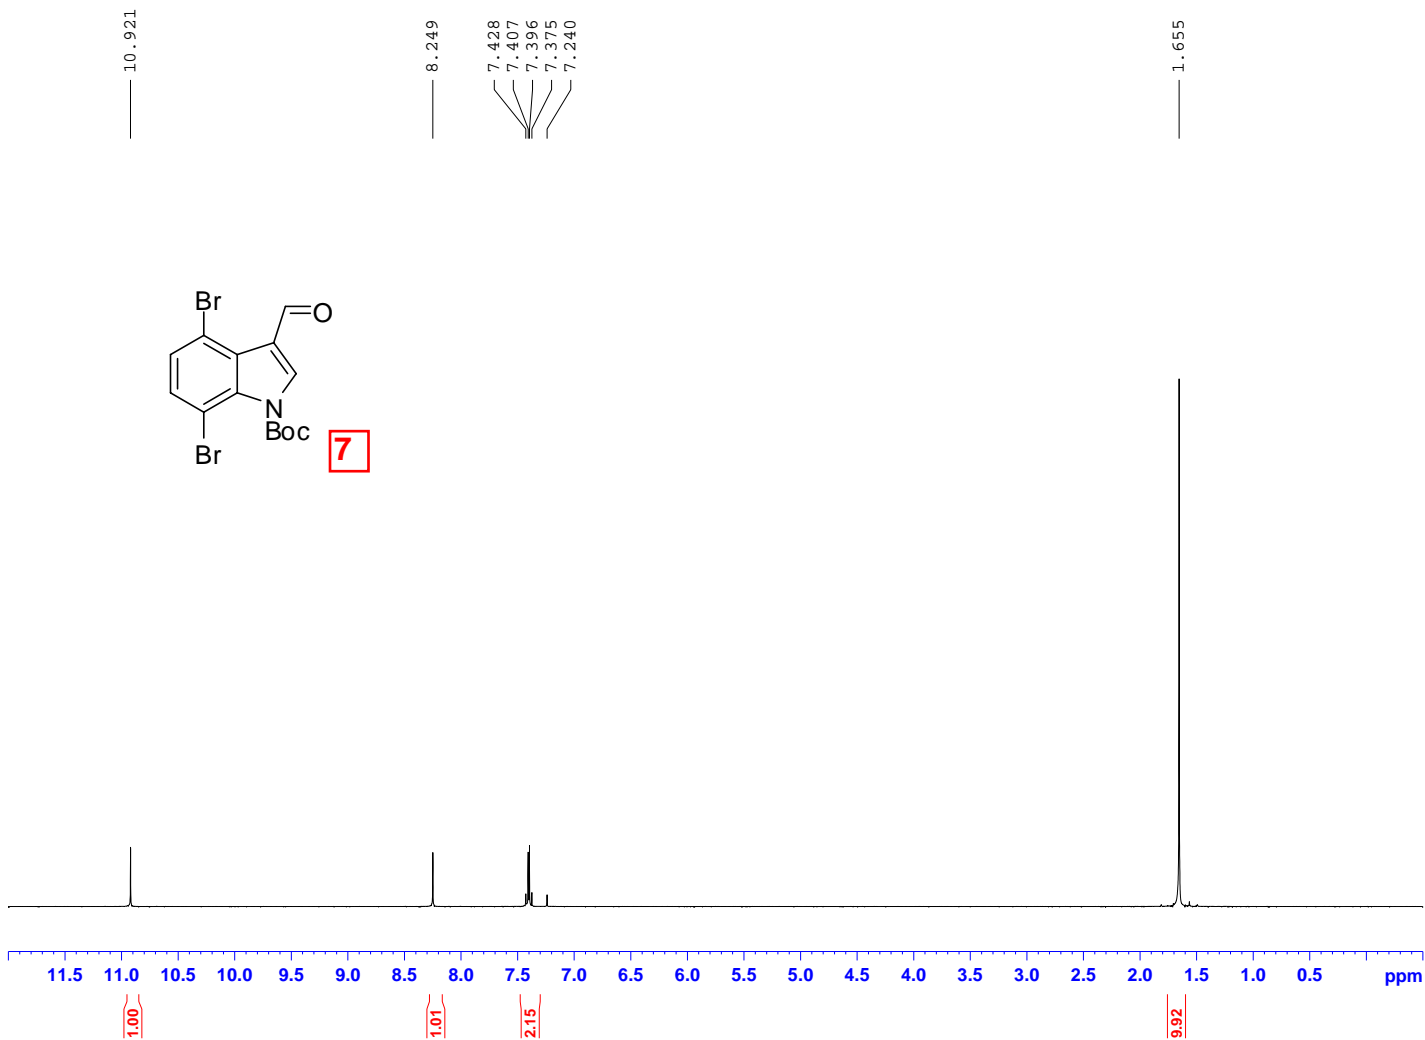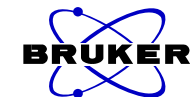

Current Data Parameters  
 NAME hlim-A33-A01(8-12)  
 EXPNO 1  
 PROCNO 1

F2 - Acquisition Parameters  
 Date\_ 20080812  
 Time 11.13  
 INSTRUM spect  
 PROBHD 5 mm QNP 1H/13  
 PULPROG zg30  
 TD 65536  
 SOLVENT CDCl3  
 NS 16  
 DS 2  
 SWH 8278.146 Hz  
 FIDRES 0.126314 Hz  
 AQ 3.9584243 sec  
 RG 256  
 DW 60.400 usec  
 DE 6.00 usec  
 TE 300.2 K  
 D1 1.00000000 sec  
 MCREST 0.00000000 sec  
 MCWRK 0.01500000 sec

===== CHANNEL f1 =====  
 NUC1 1H  
 P1 13.00 usec  
 PL1 0.00 dB  
 SFO1 400.1324710 MHz

F2 - Processing parameters  
 SI 32768  
 SF 400.1300176 MHz  
 WDW EM  
 SSB 0  
 LB 0.30 Hz  
 GB 0  
 PC 1.00

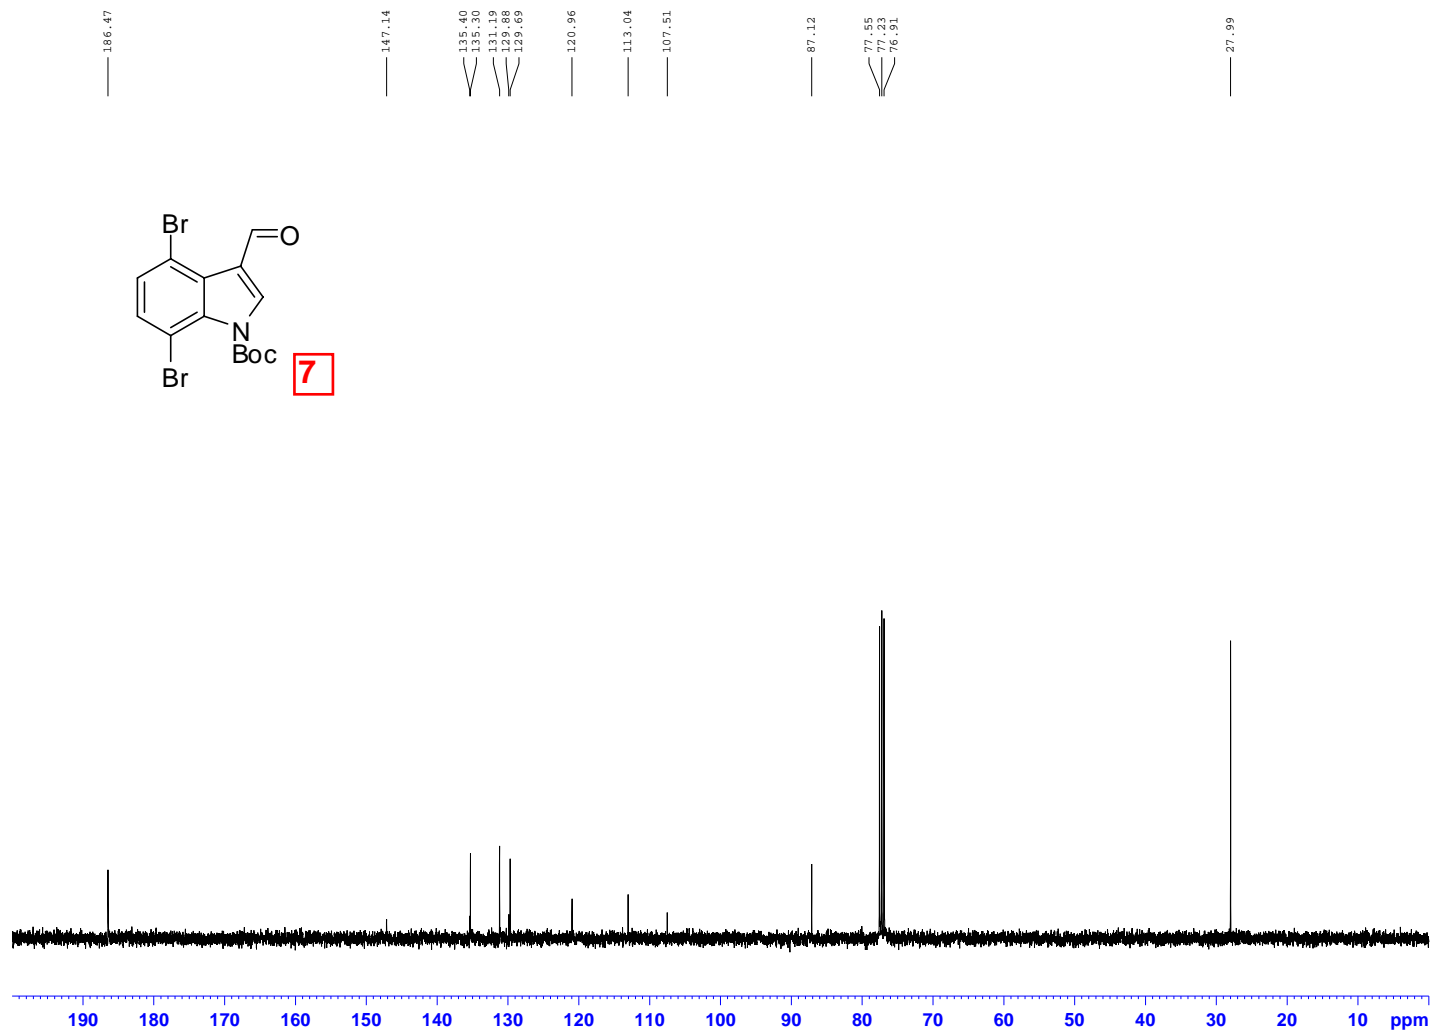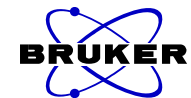

Current Data Parameters  
NAME hlim-A33-A01(8-12)-C  
EXPNO 1  
PROCNO 1

F2 - Acquisition Parameters  
Date\_ 20080812  
Time 11.17  
INSTRUM spect  
PROBHD 5 mm QNP 1H/13  
PULPROG zgpg30  
TD 65536  
SOLVENT CDCl3  
NS 57  
DS 4  
SWH 23980.814 Hz  
FIDRES 0.365918 Hz  
AQ 1.3664756 sec  
RG 3649.1  
DW 20.850 usec  
DE 6.00 usec  
TE 300.2 K  
D1 2.00000000 sec  
d11 0.03000000 sec  
DELTA 1.89999998 sec  
MCREST 0.00000000 sec  
MCWRK 0.01500000 sec

===== CHANNEL f1 =====  
NUC1 13C  
P1 10.50 usec  
PL1 0.00 dB  
SFO1 100.6228298 MHz

===== CHANNEL f2 =====  
CPDPRG2 waltz16  
NUC2 1H  
PCPD2 80.00 usec  
PL2 -6.00 dB  
PL12 14.56 dB  
PL13 16.50 dB  
SFO2 400.1316005 MHz

F2 - Processing parameters  
SI 32768  
SF 100.6127483 MHz  
WDW EM  
SSB 0  
LB 1.00 Hz  
GB 0  
PC 1.40

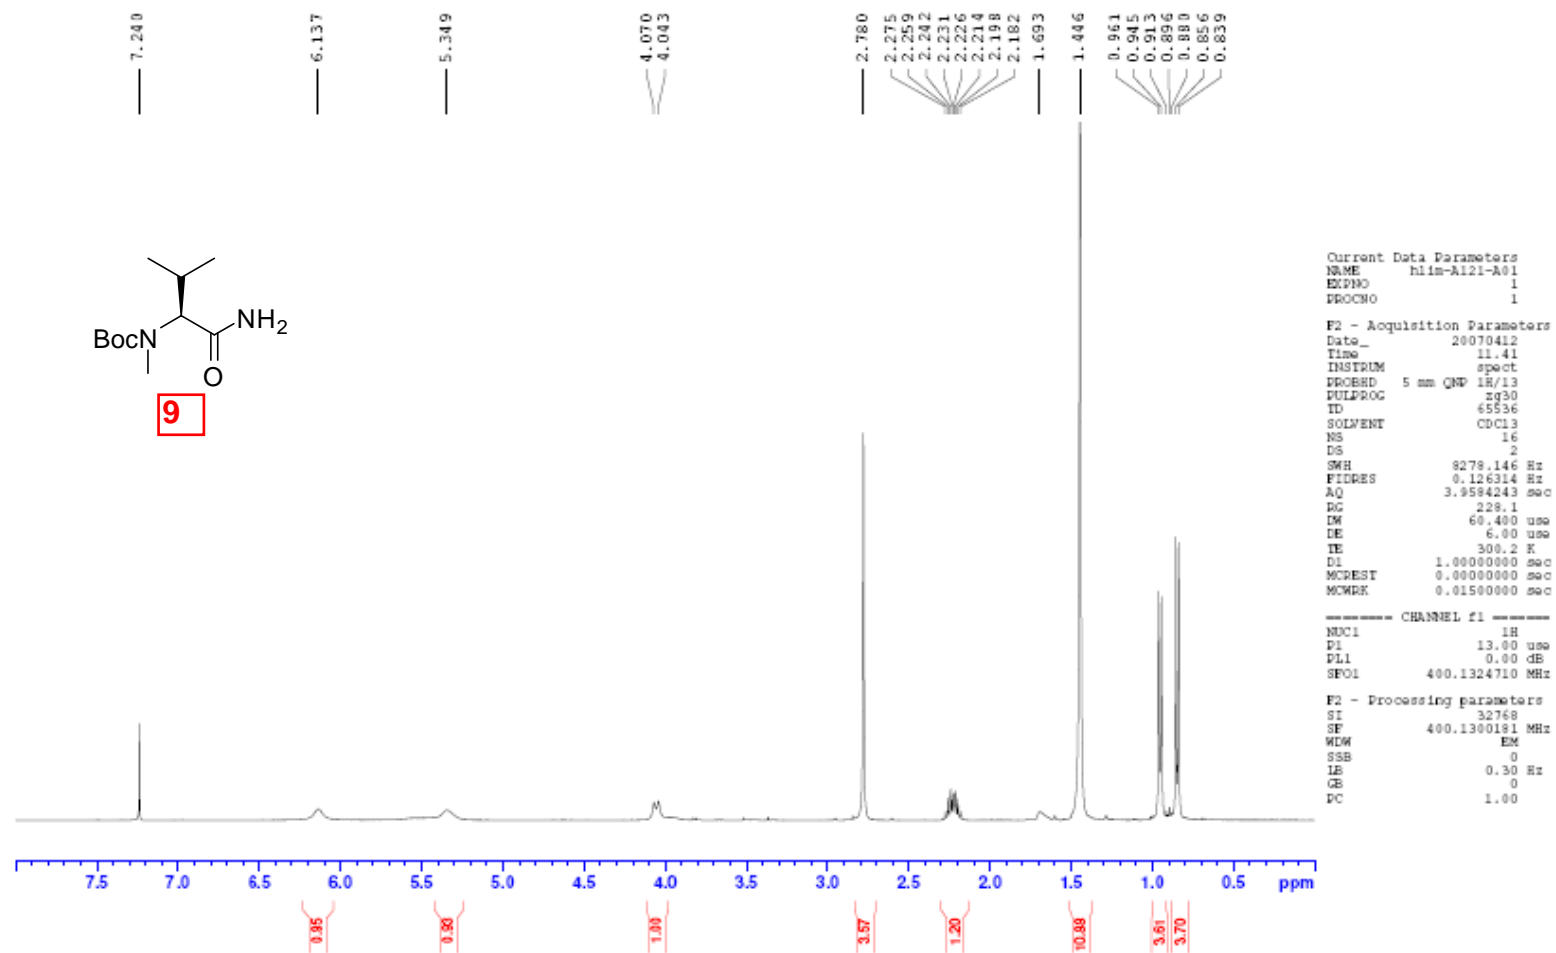

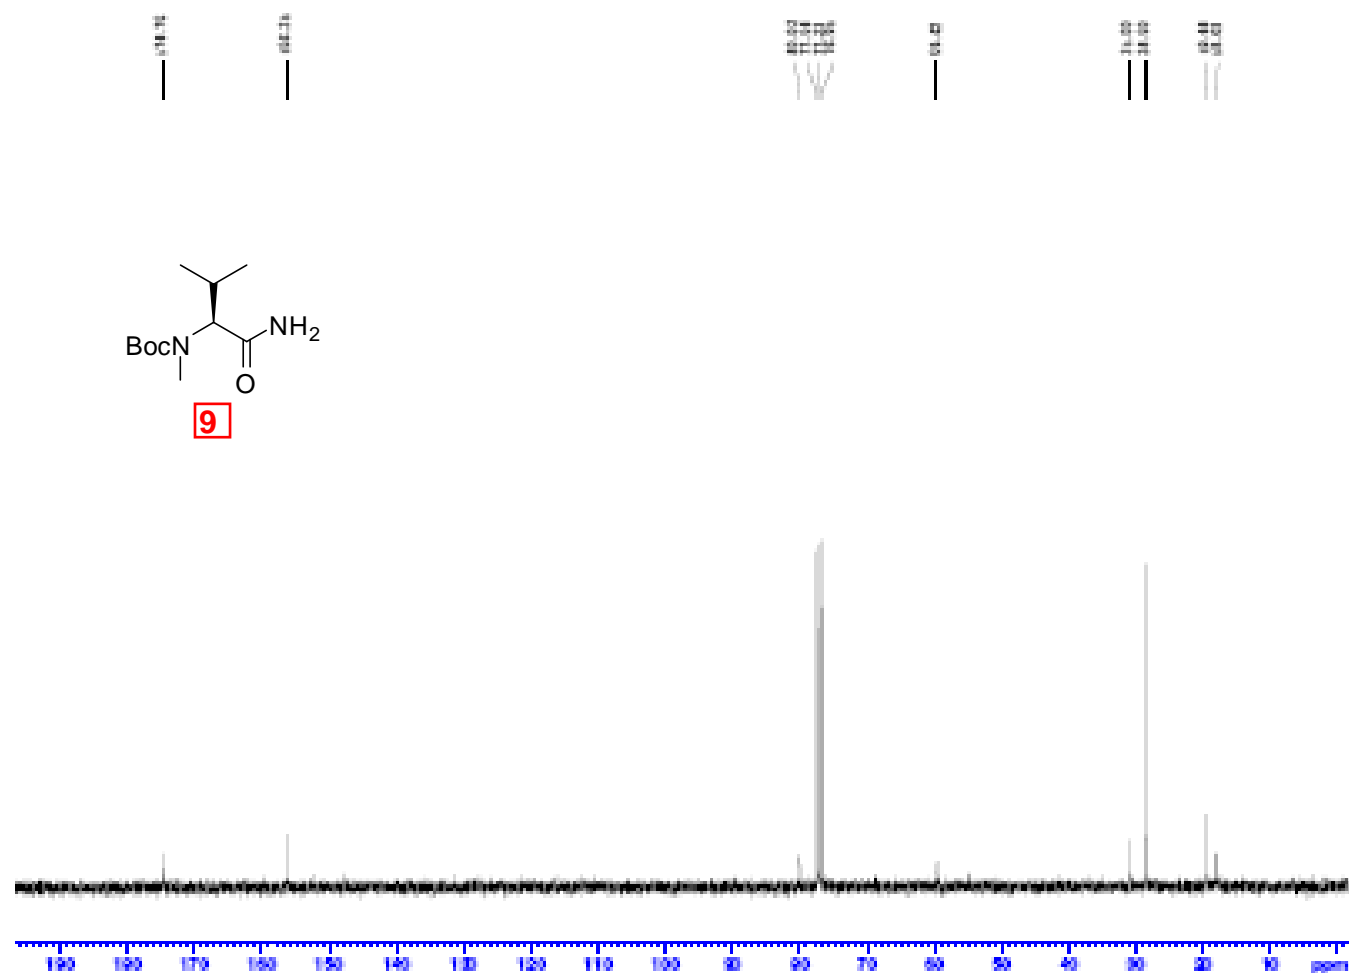

Current Data Parameters  
NAME: 11111111-1111-1111-1111-1111  
EXPNO: 1  
PROCNO: 1

PD - Acquisition Parameters  
Date\_: 11111111  
Time: 11.11  
INSTRUM: spect  
PROBHD: 5 mm QNP 1H/13  
PULPROG: zgpg30  
TD: 65536  
SOLVENT: DMSO  
NS: 64  
DS: 4  
SWH: 12180.824 Hz  
FIDRES: 0.348188 Hz  
AQ: 1.2666776 sec  
RG: 4096  
IN: 20.000 sec  
TE: 300.2 K  
DE: 0.0000000 sec  
d11: 0.0100000 sec  
DELTA: 1.0000000 sec  
ACQRES: 0.0000000 sec  
SOLRES: 0.0100000 sec

===== CHANNEL f1 =====  
NUC1: 13C  
P1: 19.00 sec  
PL1: 0.00 dB  
PC1: 200.1314000 MHz

===== CHANNEL f2 =====  
CPDPRG2: waltz16  
NUC2: 1H  
PCPD2: 19.00 sec  
PL2: -2.00 dB  
PL12: 19.00 dB  
PL13: 19.00 dB  
PC2: 200.1314000 MHz

PD - Processing parameters  
SI: 32768  
SF: 200.1314000 MHz  
RG: 4096  
WDW: EM  
SSB: 0  
LB: 1.00 Hz  
GB: 0  
PC: 1.00

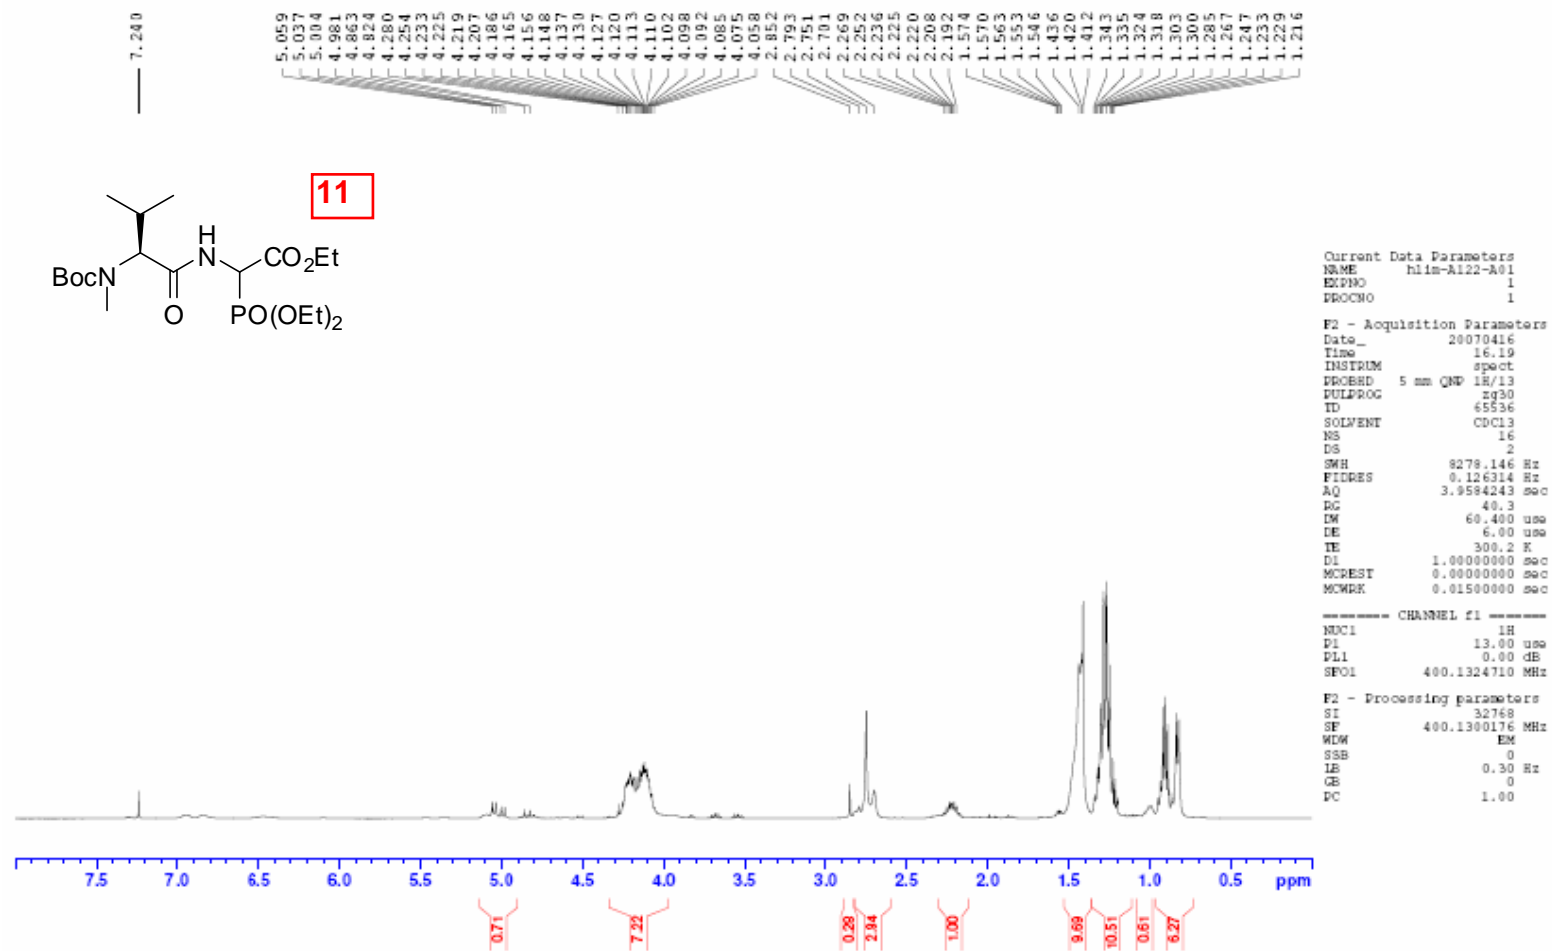

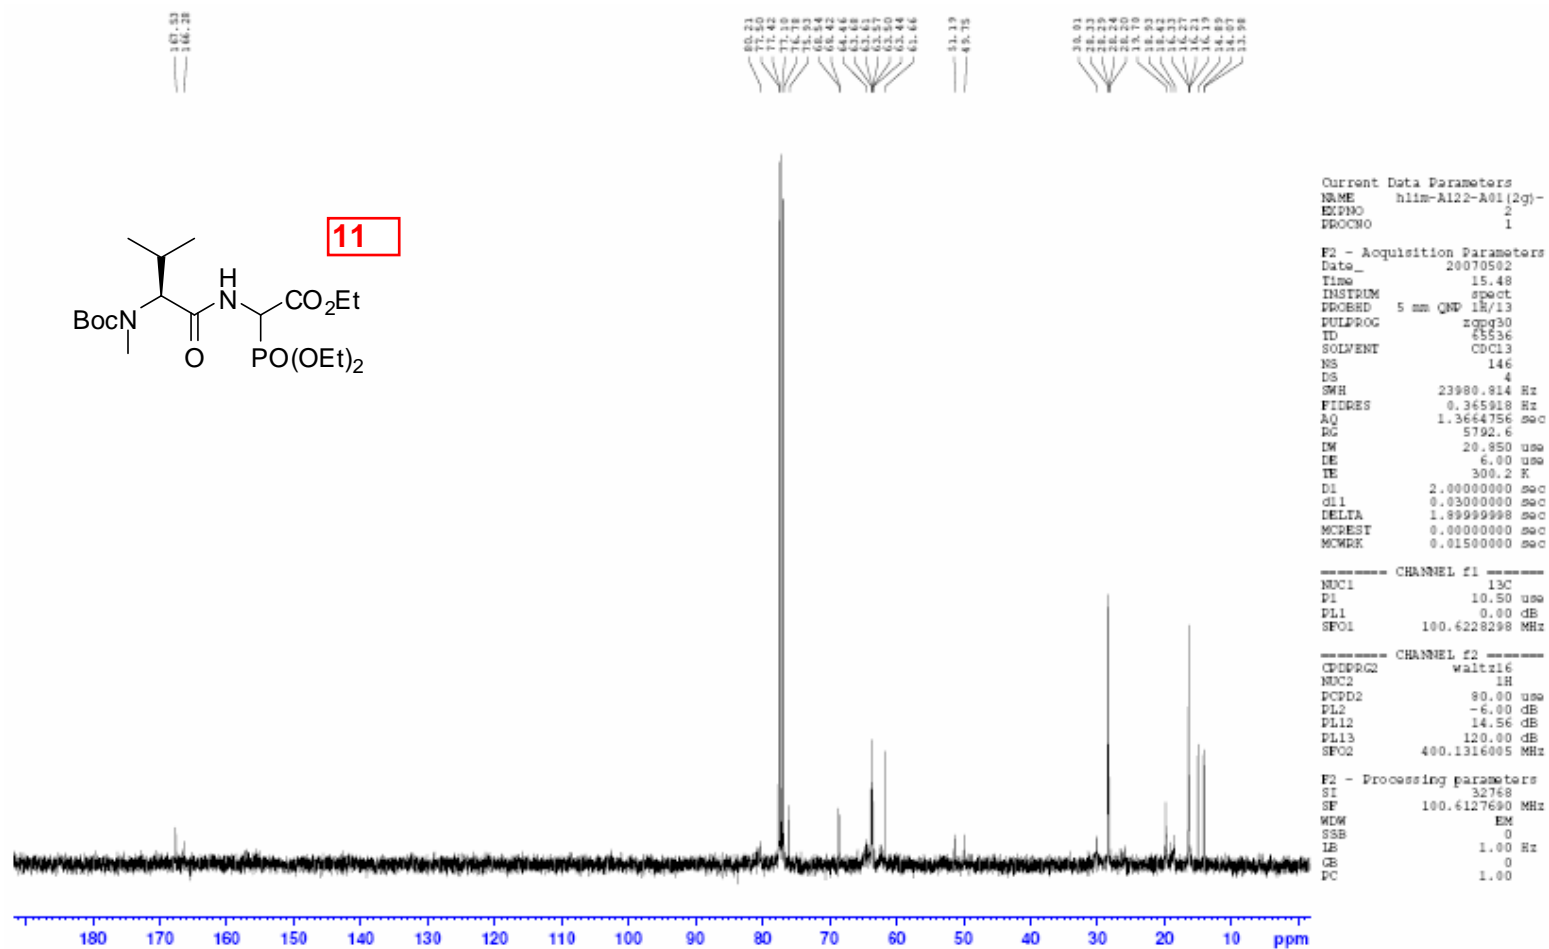

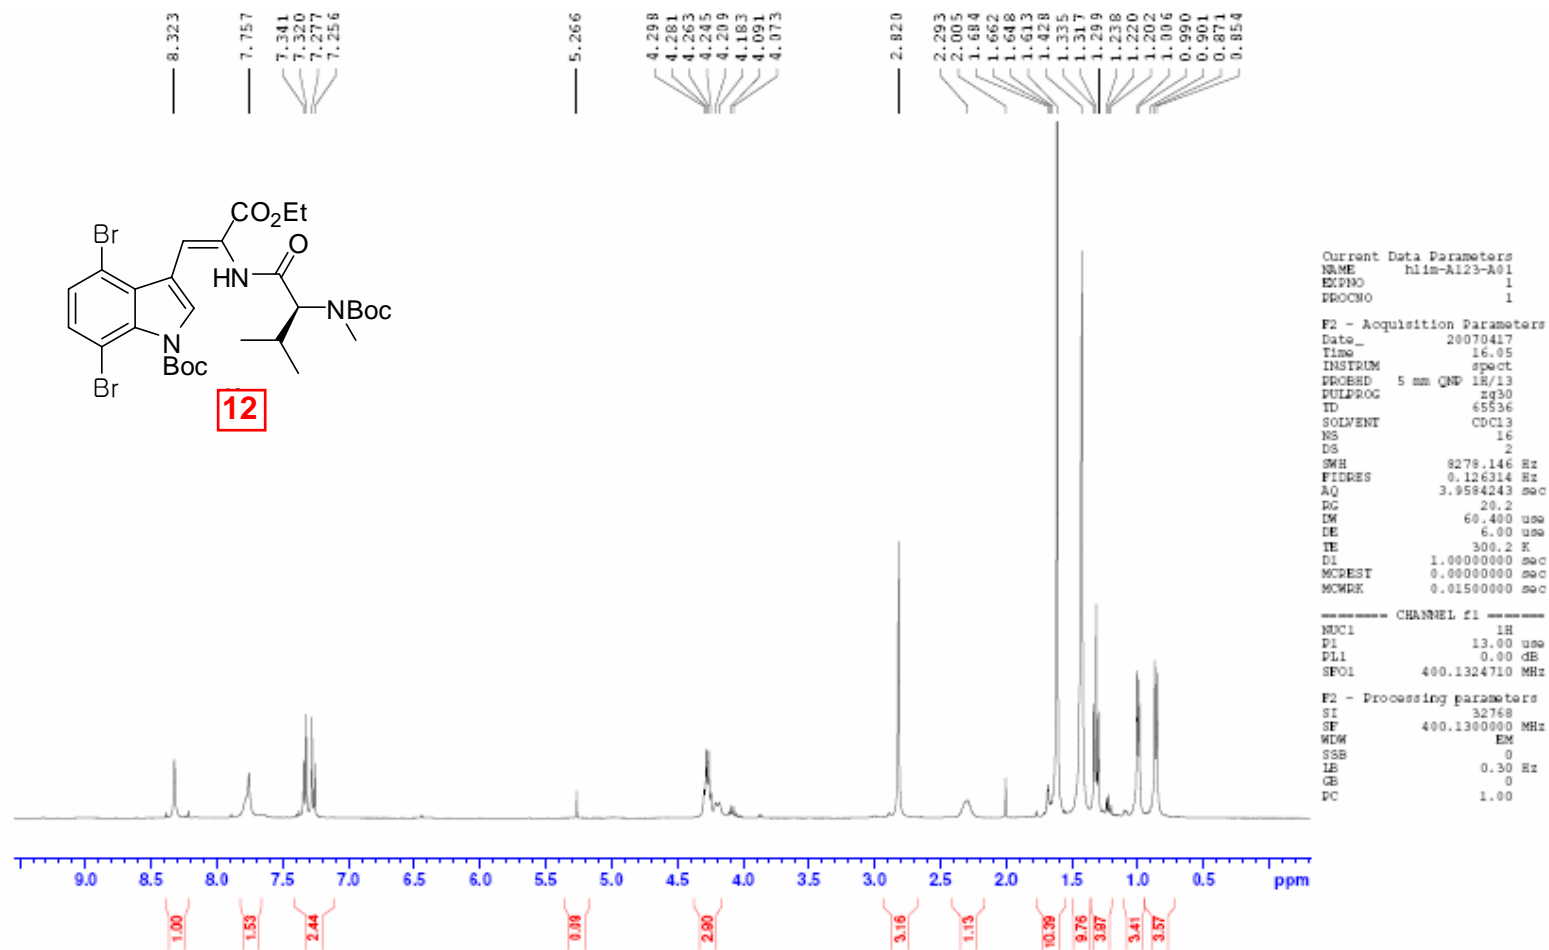



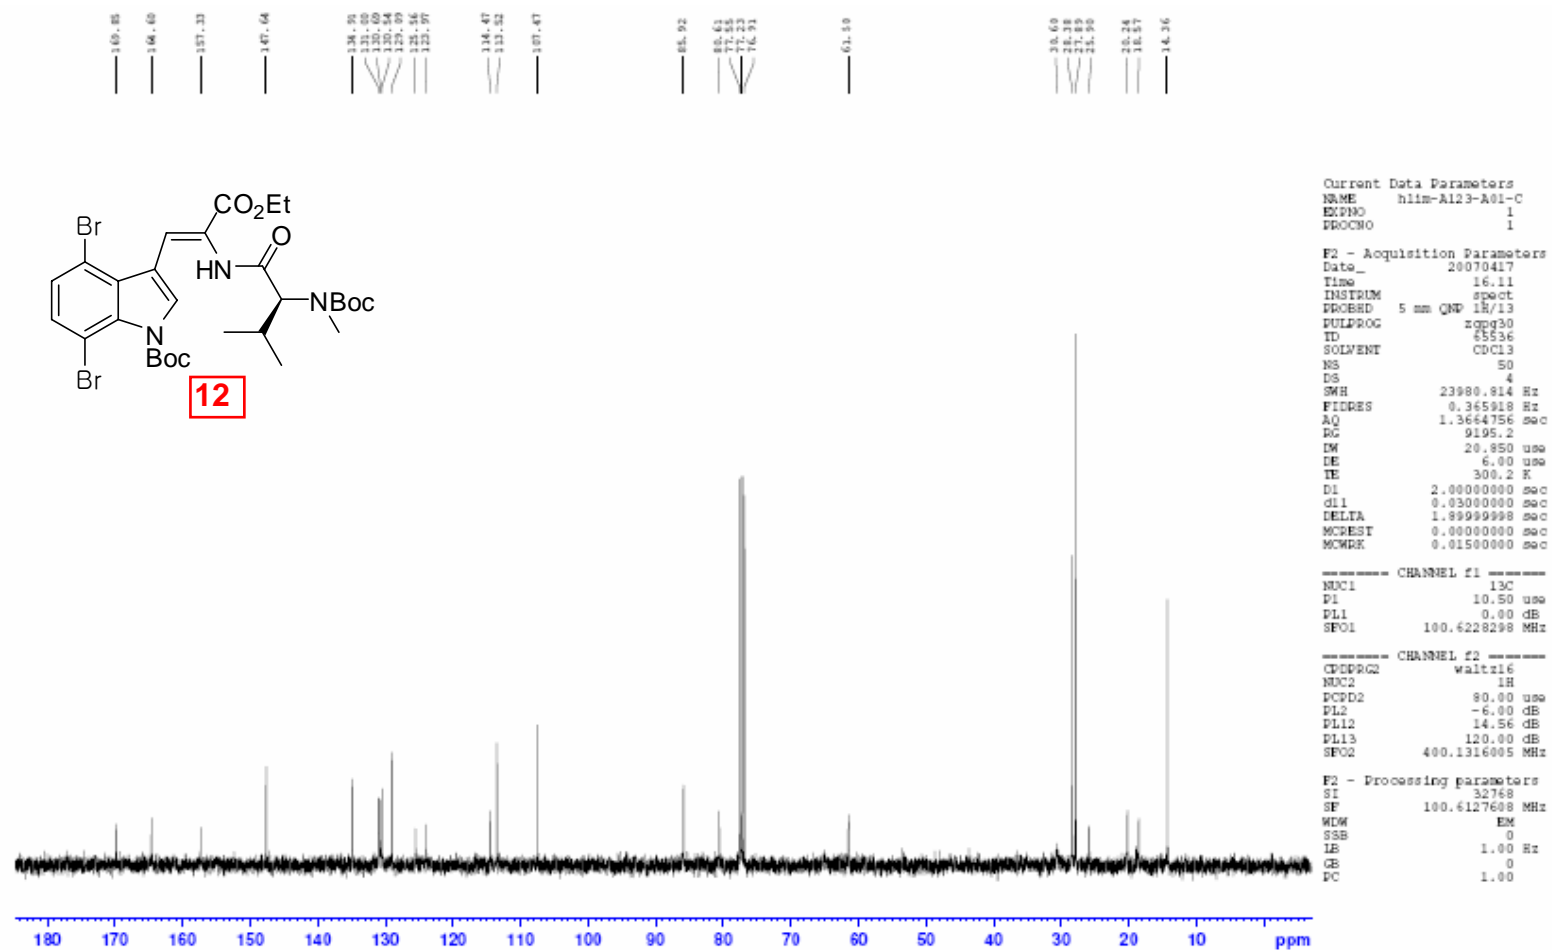

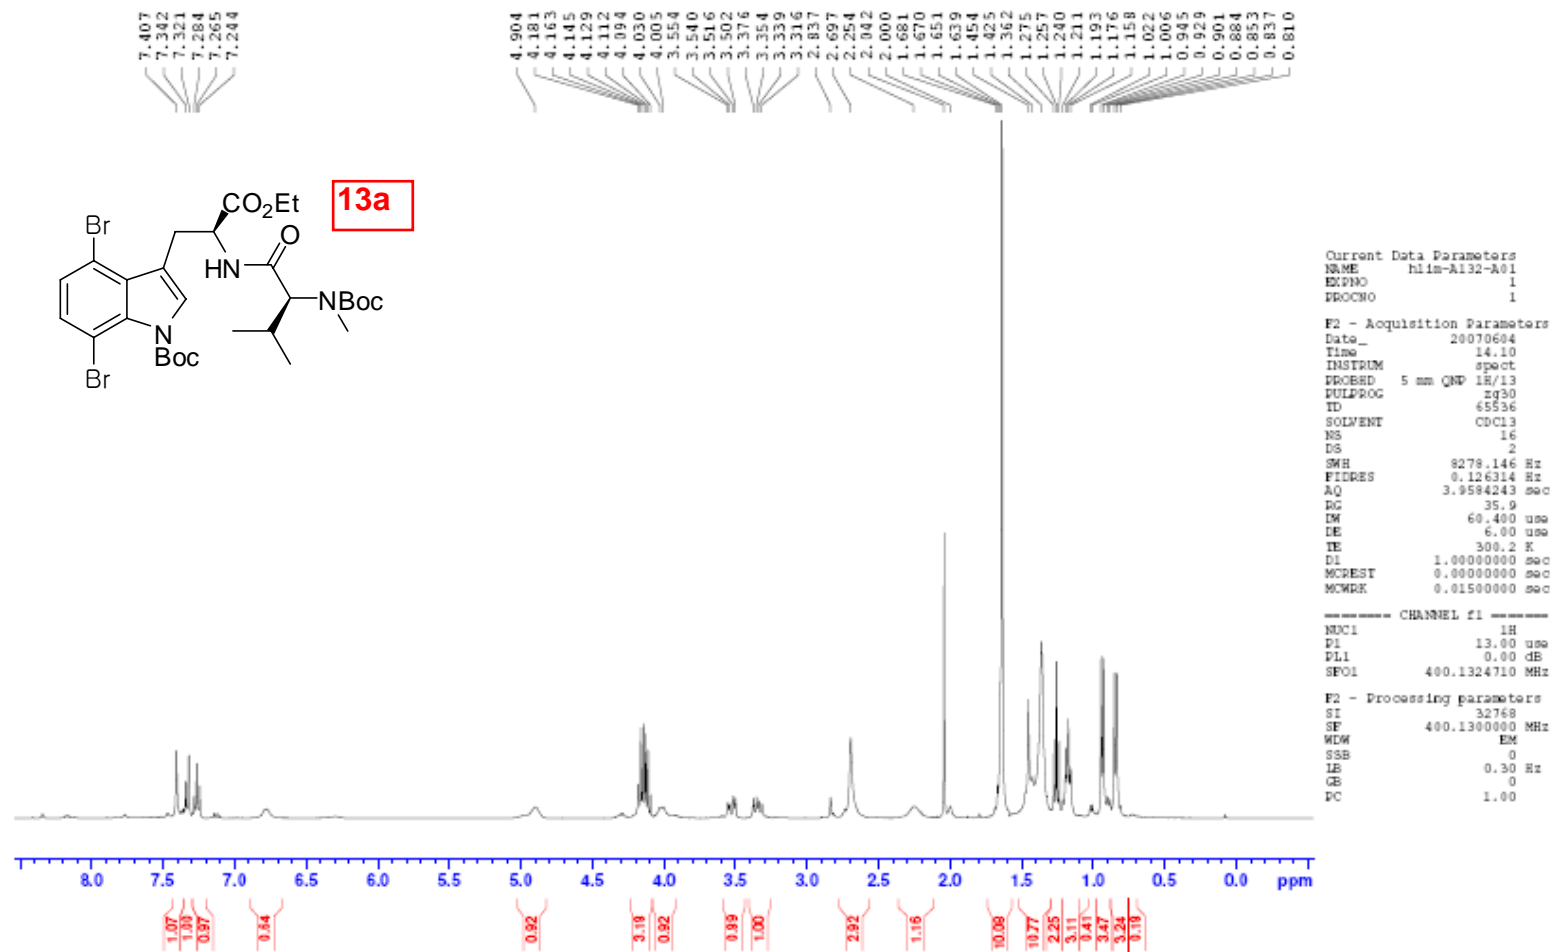

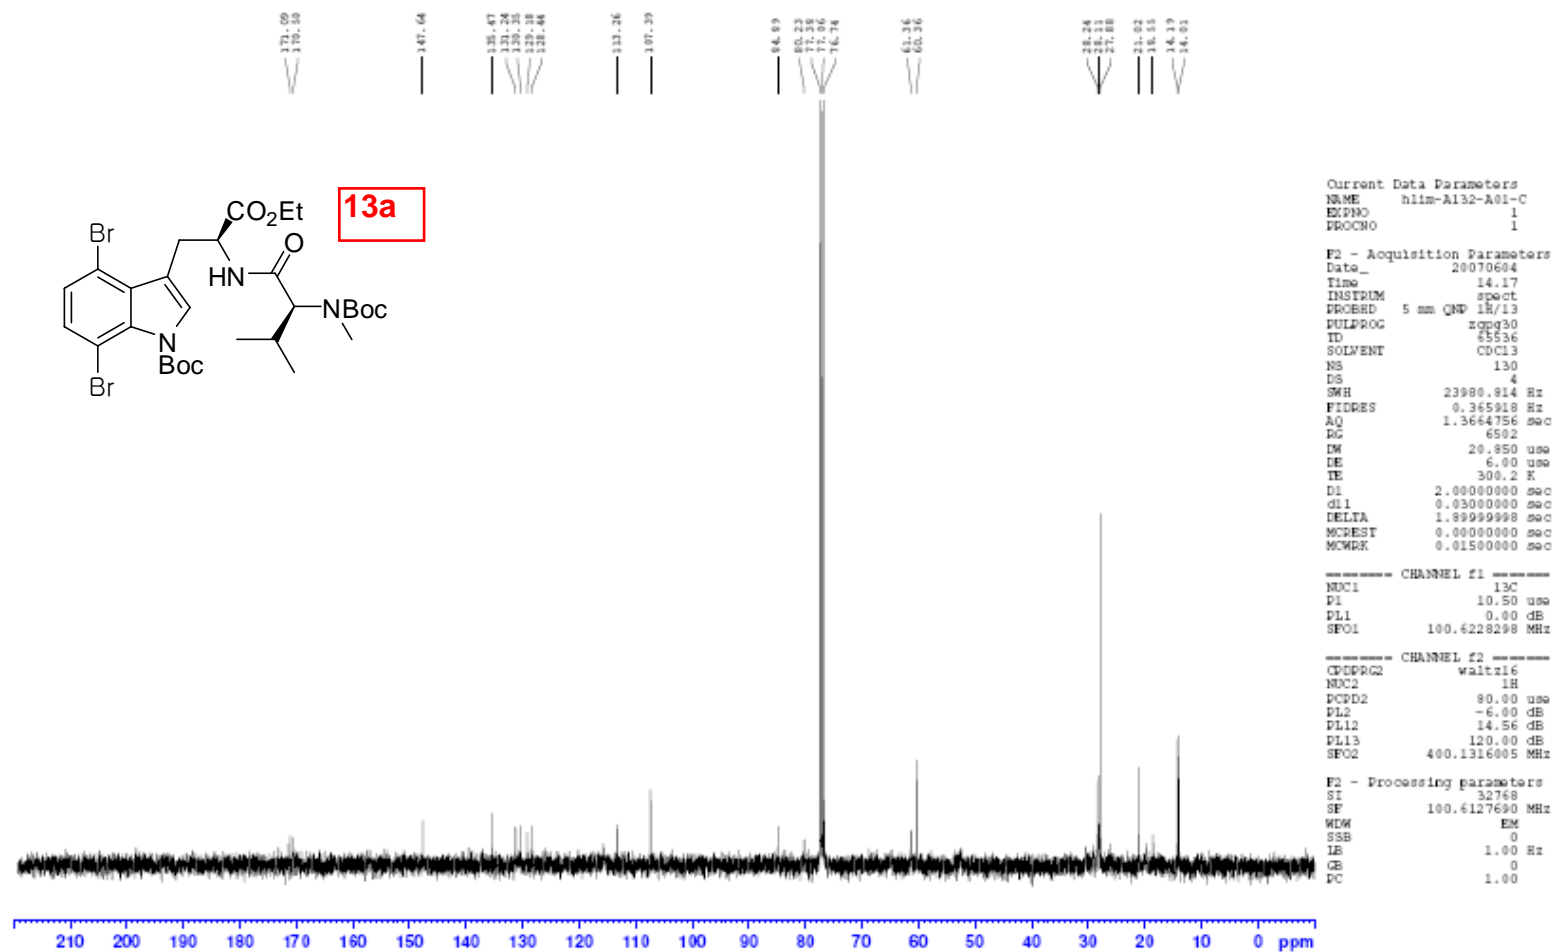

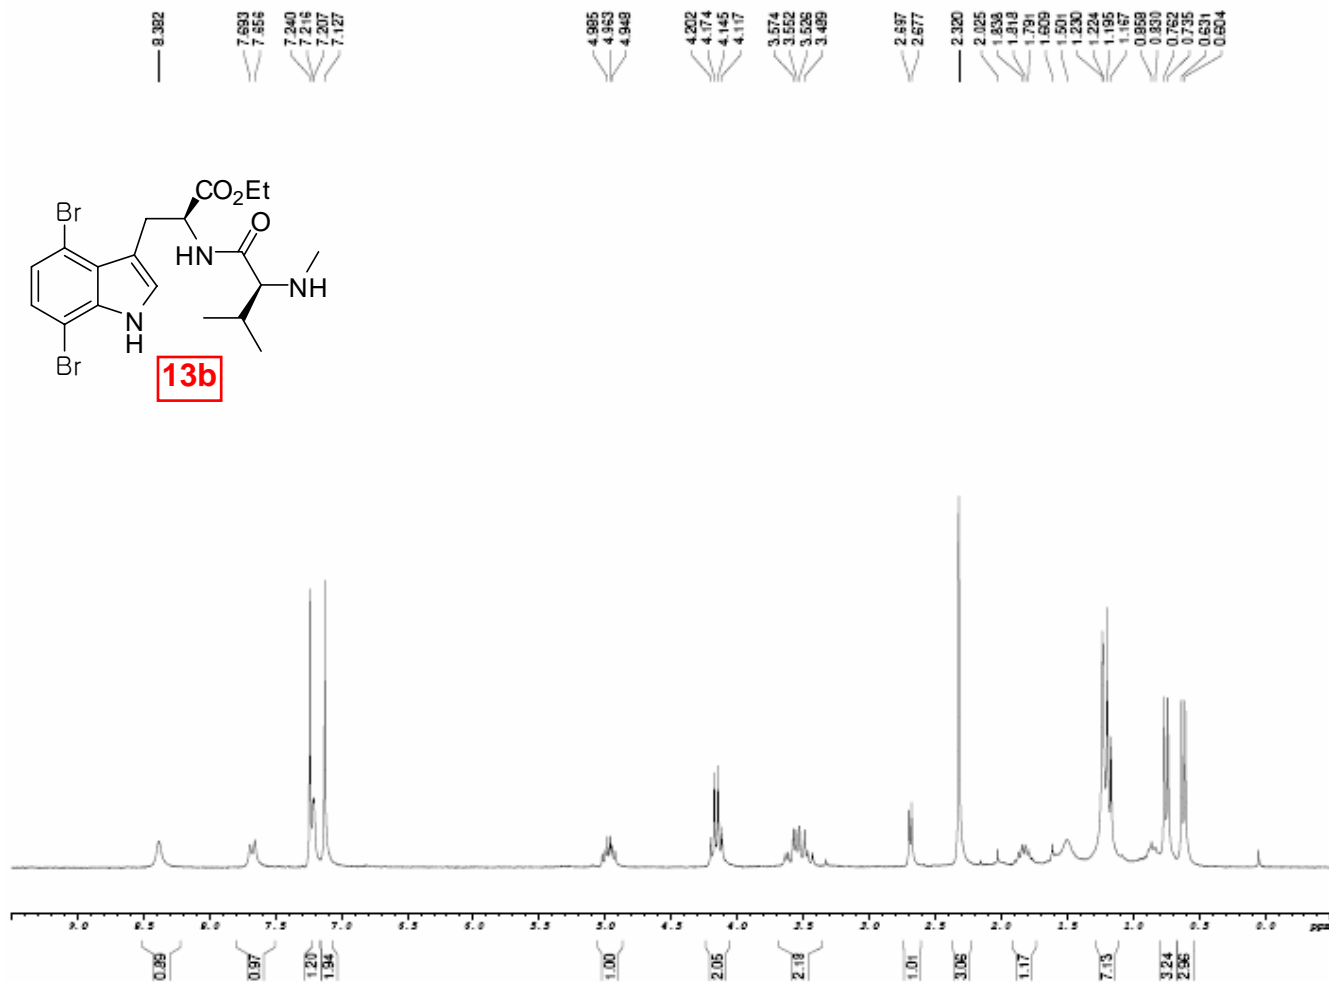

```

Current Data Parameters
NAME      hlis-A133-C010
EXPROB    1
PROCNO    1

F2 - Acquisition Parameters
Date_     20071124
Time      13.04
INSTRUM    spect
PROBHD     5 mm QNP 1H/13
PULPROG    zg30
TD         16384
SOLVENT     CDCl3
NS         16
DS         2
FIDRES      5175.983 Hz
AQ         0.015917 Hz
RG         1.5827444 sec
RG         1149.4
SM         96.000 usec
DE         6.00 usec
TE         0.0 K
Sf         1.00000000 sec
MCREST     0.00000000 sec
MORFKE     0.01500000 sec

===== CHANNEL f1 =====
NUC1       1H
P1         7.20 usec
PL1        -4.00 dB
SFO1       250.1315447 MHz

F2 - Processing parameters
SI         32768
SF         250.1300054 MHz
WDW        EM
SSB        0
GB         0.30 Hz
GC         0
PC         1.00

```

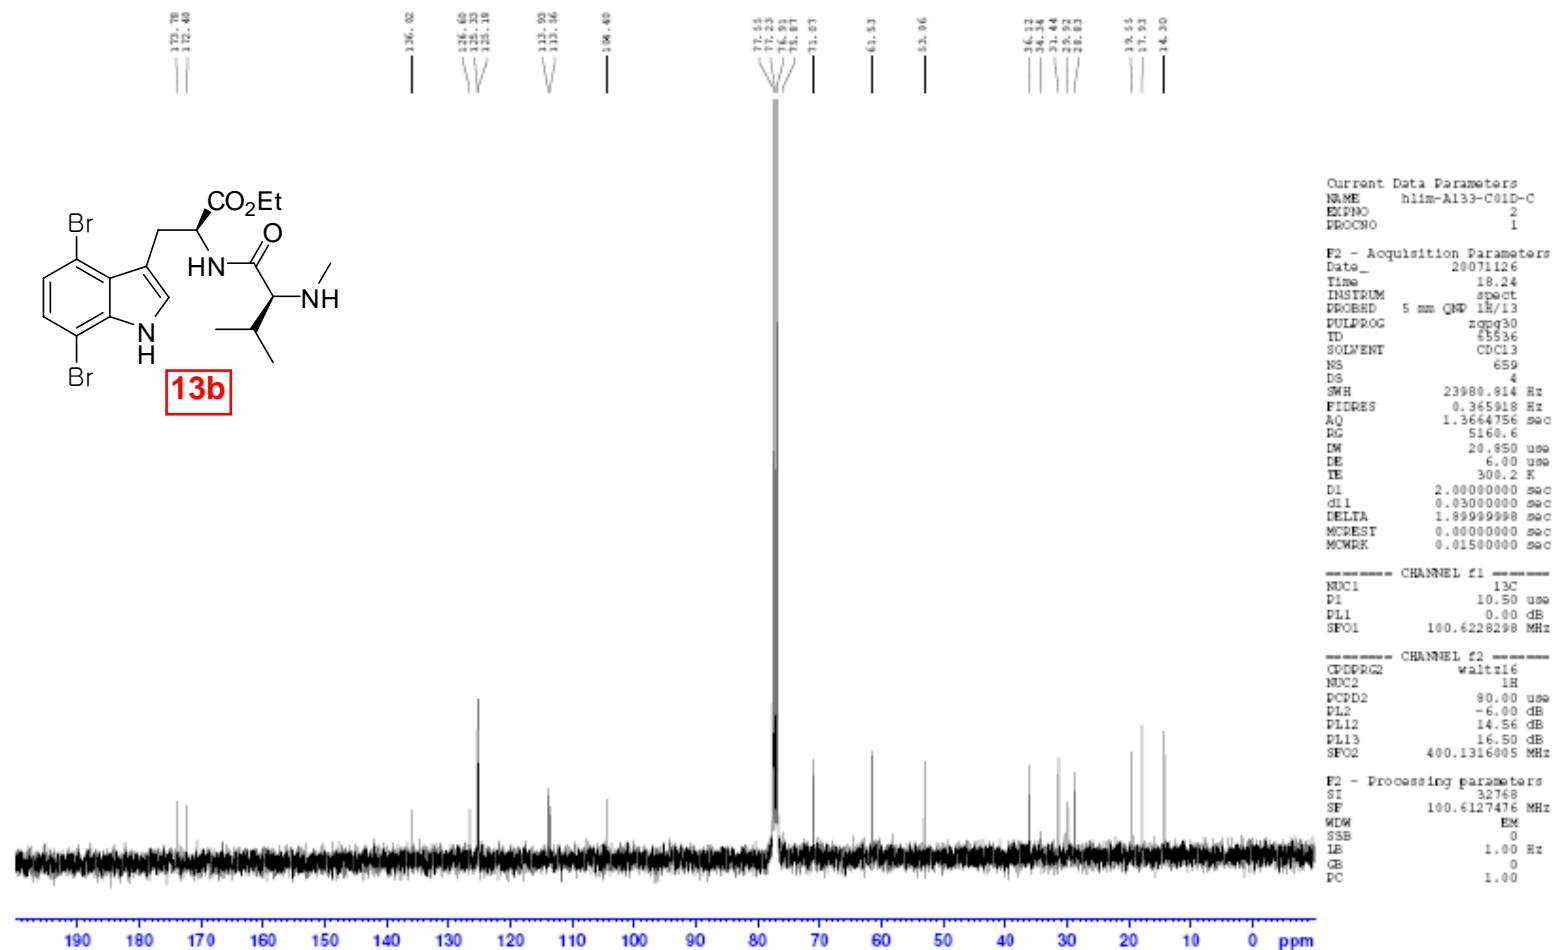

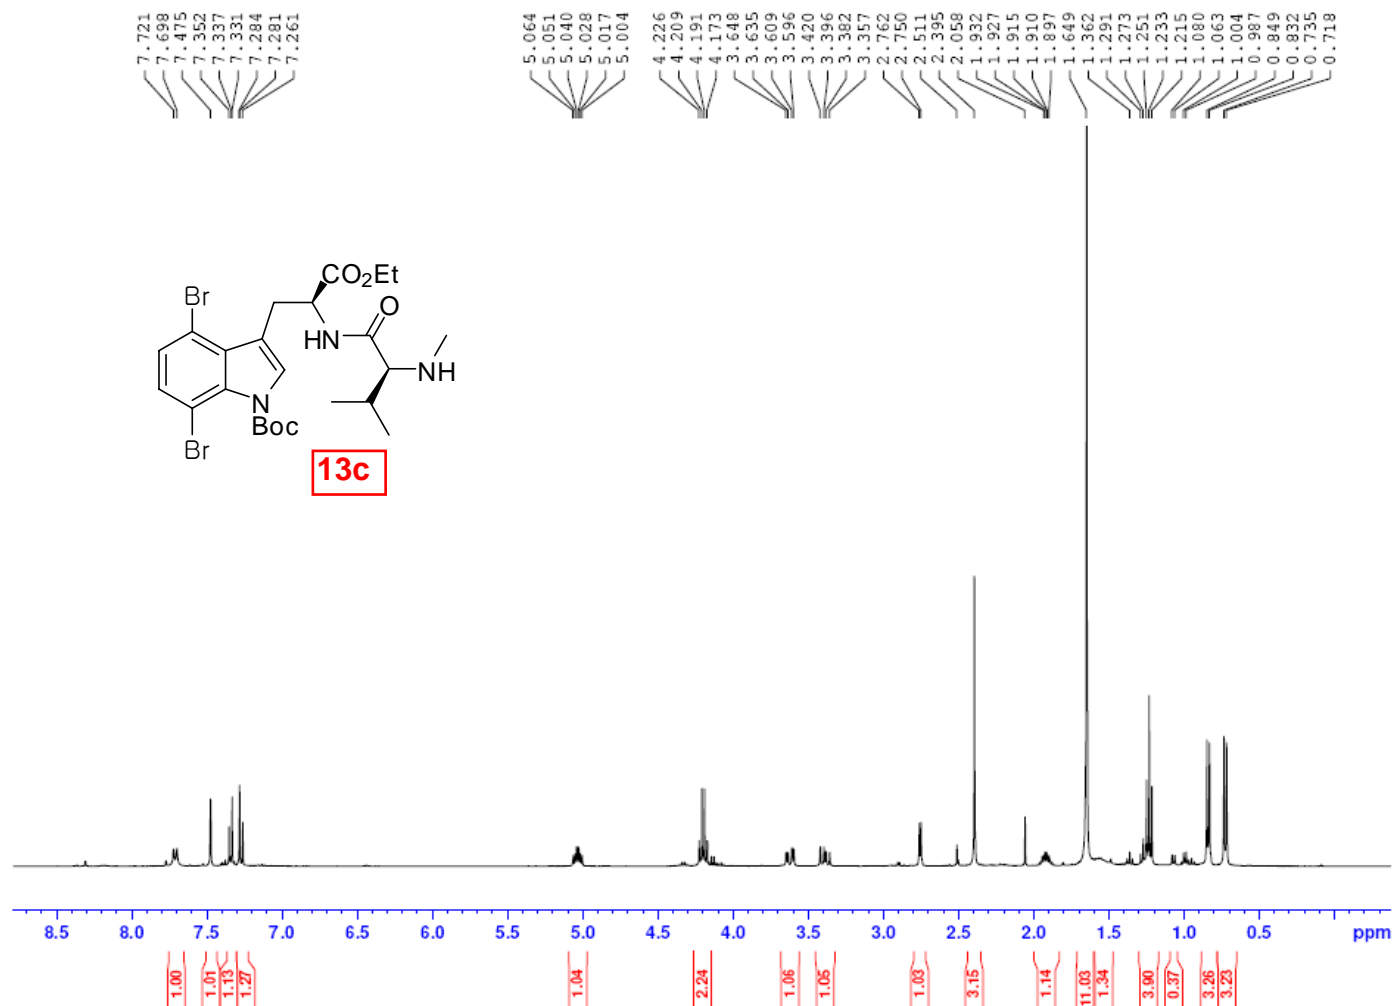

Current Data Parameters  
NAME hlim-A126-A03  
EXPNO 1  
PROCNO 1

F2 - Acquisition Parameters  
Date\_ 20070509  
Time 12.49  
INSTRUM spect  
PROBHD 5 mm QNP 1H/13  
PULPROG zg30  
ID 65536  
SOLVENT CDCl3  
NS 16  
DS 2  
SWH 8278.146 Hz  
FIDRES 0.126314 Hz  
AQ 3.9584243 sec  
RG 101.6  
DW 60.400 use  
DE 6.00 use  
TE 300.2 K  
D1 1.00000000 sec  
MCREST 0.00000000 sec  
MCWRK 0.01500000 sec

----- CHANNEL f1 -----  
NUC1 1H  
P1 13.00 use  
PL1 0.00 dB  
SFO1 400.1324710 MHz

F2 - Processing parameters  
SI 32768  
SF 400.1300000 MHz  
WDW EM  
SSB 0  
LB 0.30 Hz  
GB 0  
PC 1.00

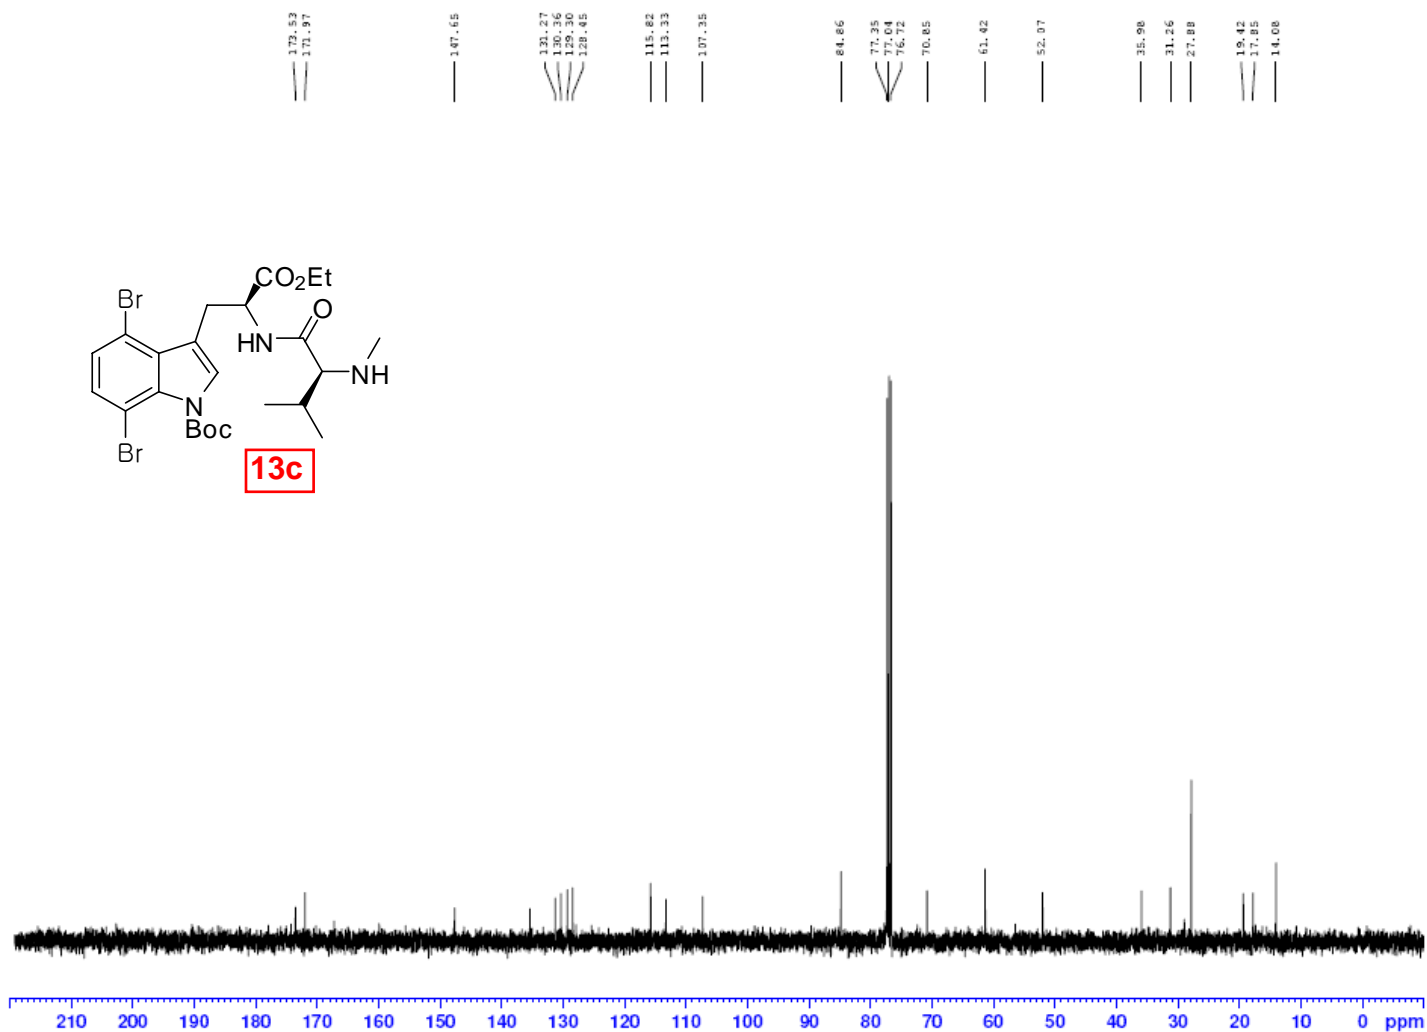

Current Data Parameters  
NAME hlim-A126-A03-C  
EXPNO 1  
PROCNO 1

F2 - Acquisition Parameters  
Date\_ 20070509  
Time 12.56  
INSTRUM spect  
PROBHD 5 mm QNP 1H/13  
PULPROG zgpg30  
TD 65536  
SOLVENT CDCl3  
NS 46  
DS 4  
SWH 23980.814 Hz  
FIDRES 0.365918 Hz  
AQ 1.3664756 sec  
RG 10321.3  
DW 20.850 use  
DE 6.00 use  
TE 300.2 K  
D1 2.00000000 sec  
d11 0.03000000 sec  
DELTA 1.89999998 sec  
MCREST 0.00000000 sec  
MCWRK 0.01500000 sec

----- CHANNEL f1 -----  
NUC1 13C  
P1 10.50 use  
PL1 0.00 dB  
SFO1 100.6228298 MHz

----- CHANNEL f2 -----  
CPDPRG2 waltz16  
NUC2 1H  
PCPD2 80.00 use  
PL2 -6.00 dB  
PL12 14.56 dB  
PL13 120.00 dB  
SFO2 400.1316005 MHz

F2 - Processing parameters  
SI 32768  
SF 100.6127690 MHz  
WDW EM  
SSB 0  
LB 1.00 Hz  
GB 0  
PC 1.00

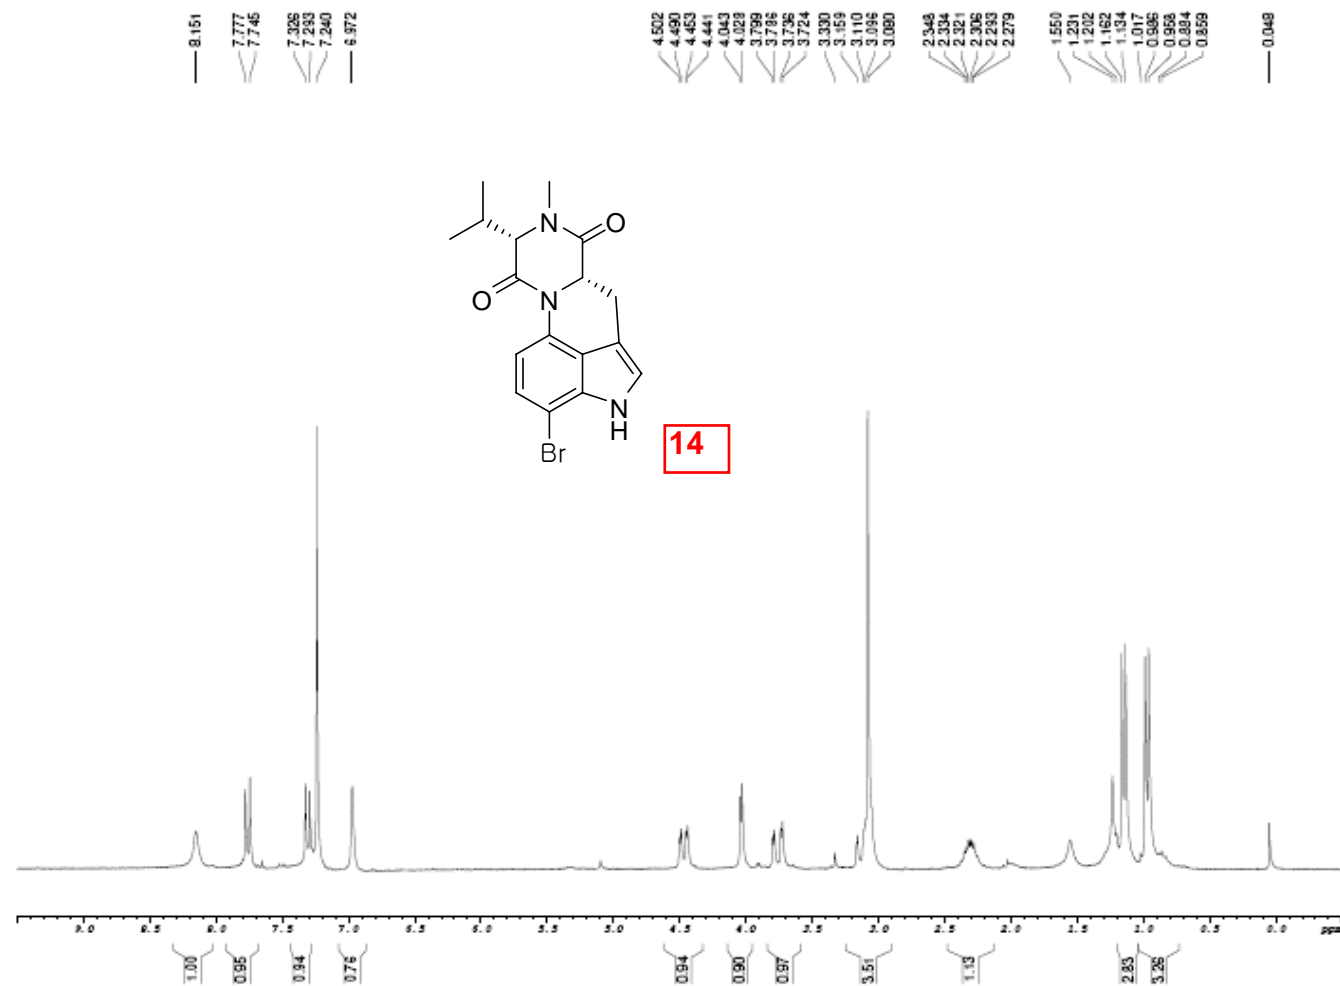

THE OHIO STATE UNIVERSITY  
CHEMISTRY DEPARTMENT  
NMR FACILITY

Current Data Parameters  
NAME hlin-A167-2012a  
EXPHO 1  
PROCNO 1

F2 - Acquisition Parameters  
Date\_ 20071124  
Time 12.26  
INSTRUM spect  
PROBHD 5 mm QNP 1H/13  
PULPROG zg30  
TD 16384  
SOLVENT cdd6  
NS 70  
DS 2  
SWH 5175.083 Hz  
FIDRES 0.315917 Hz  
AQ 1.5827444 sec  
RG 1625.5  
DM 94.600 usec  
DE 6.00 usec  
TE 0.0 K  
D1 1.00000000 sec  
MCREST 0.00000000 sec  
MCMRK 0.01500000 sec

----- CHANNEL f1 -----  
NUC1 1H  
P1 7.20 usec  
PL1 -4.00 dB  
SFO1 250.1315447 MHz

F2 - Processing parameters  
SI 32768  
SF 250.1300057 MHz  
WDW EM  
SSB 0  
LB 0.30 Hz  
GB 0  
PC 1.00



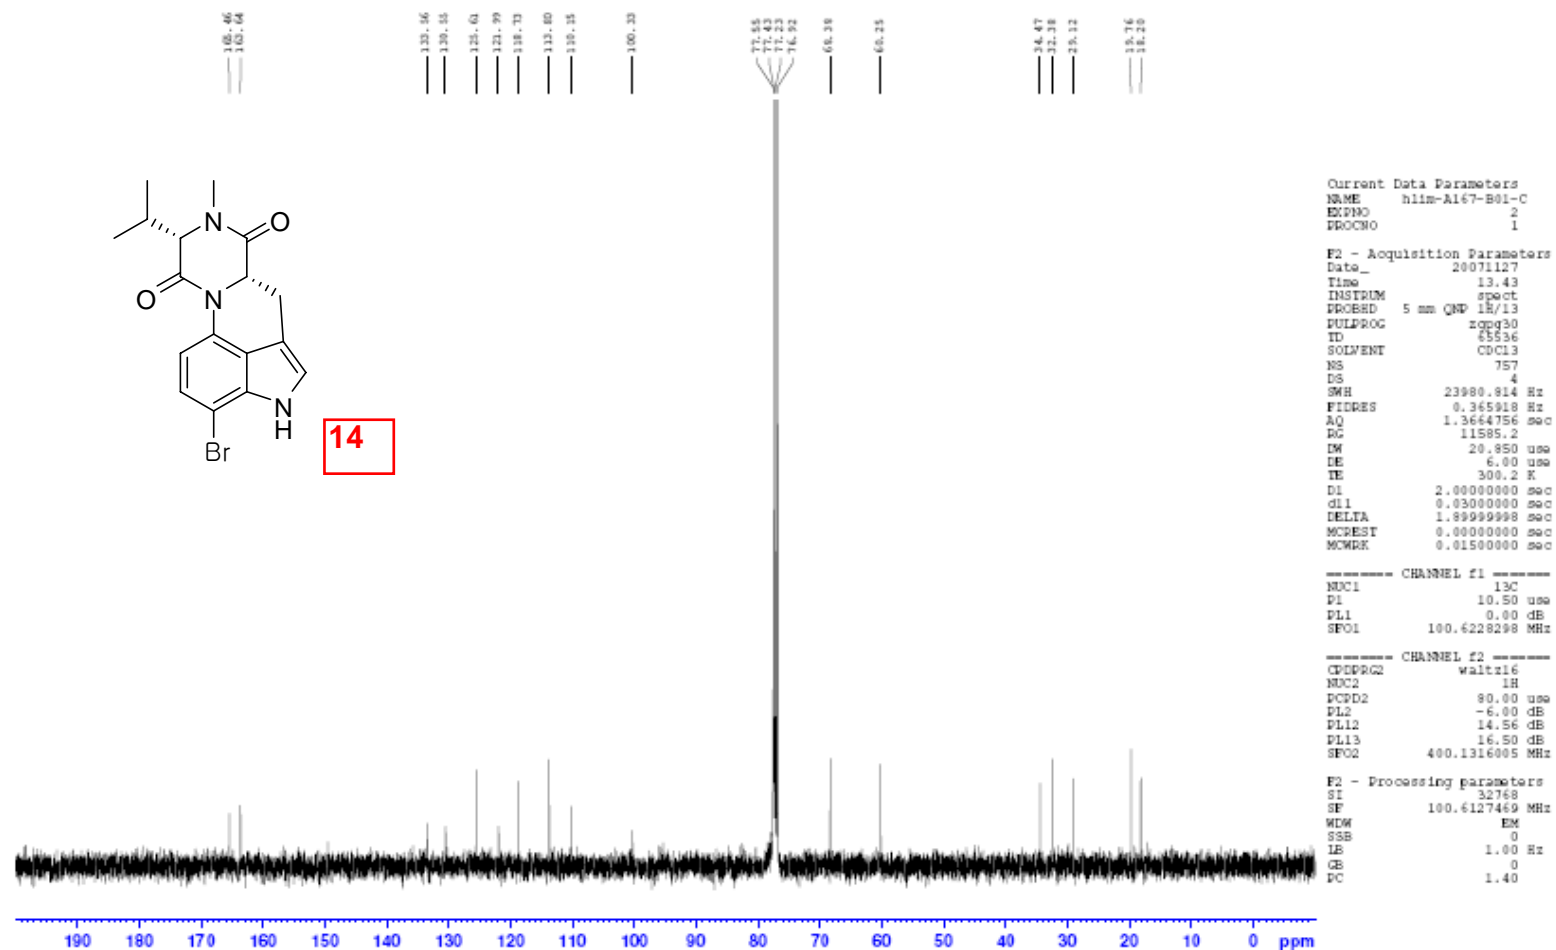

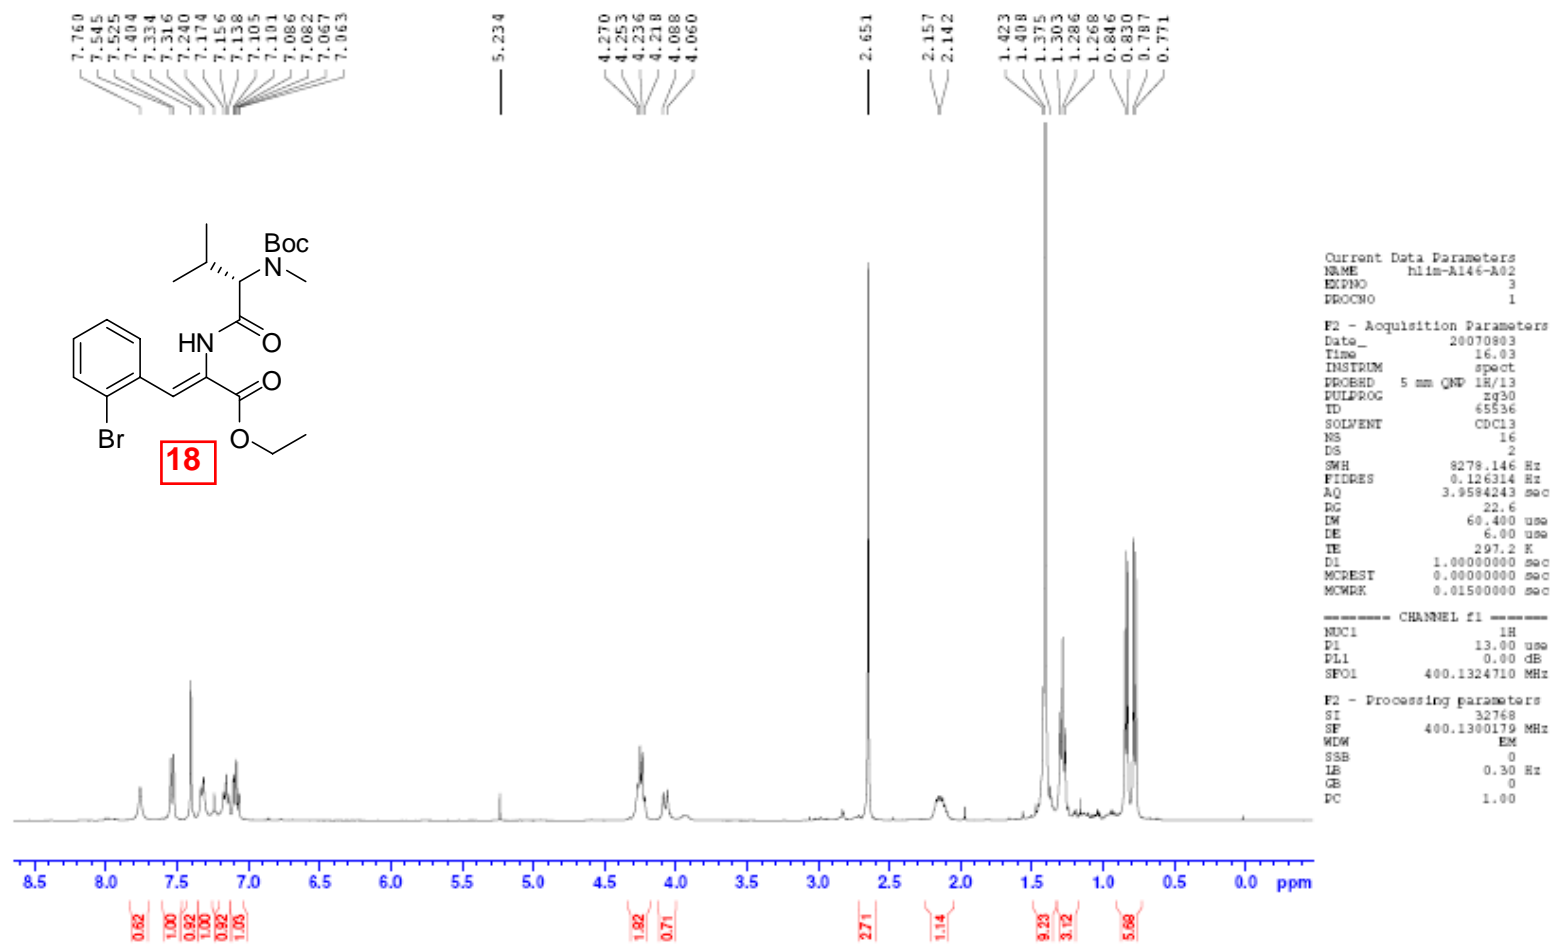

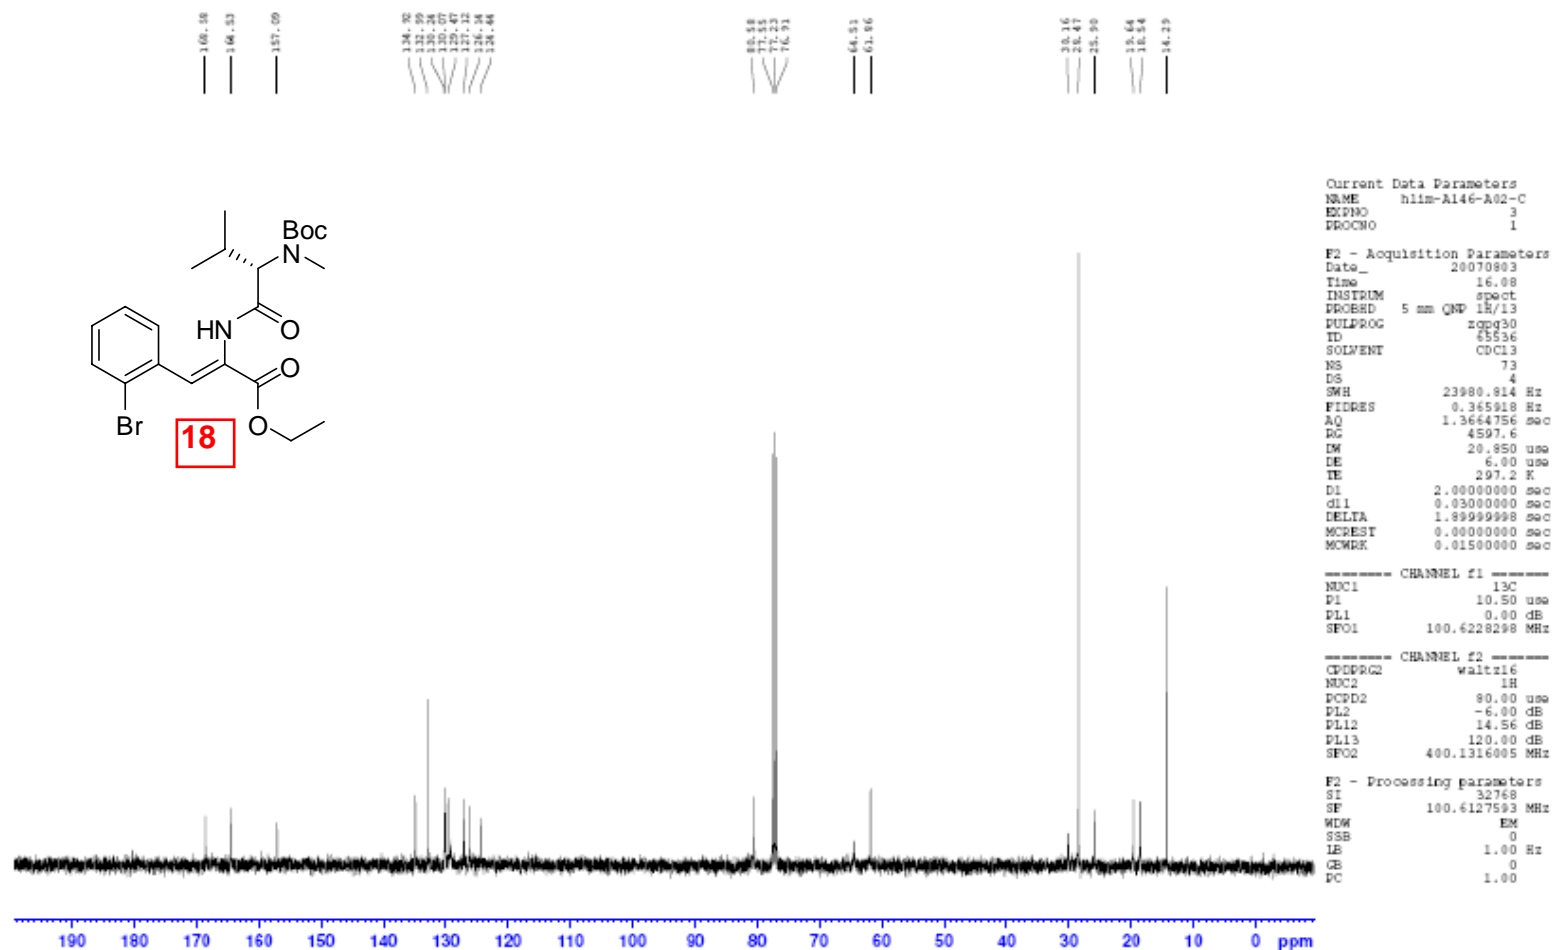

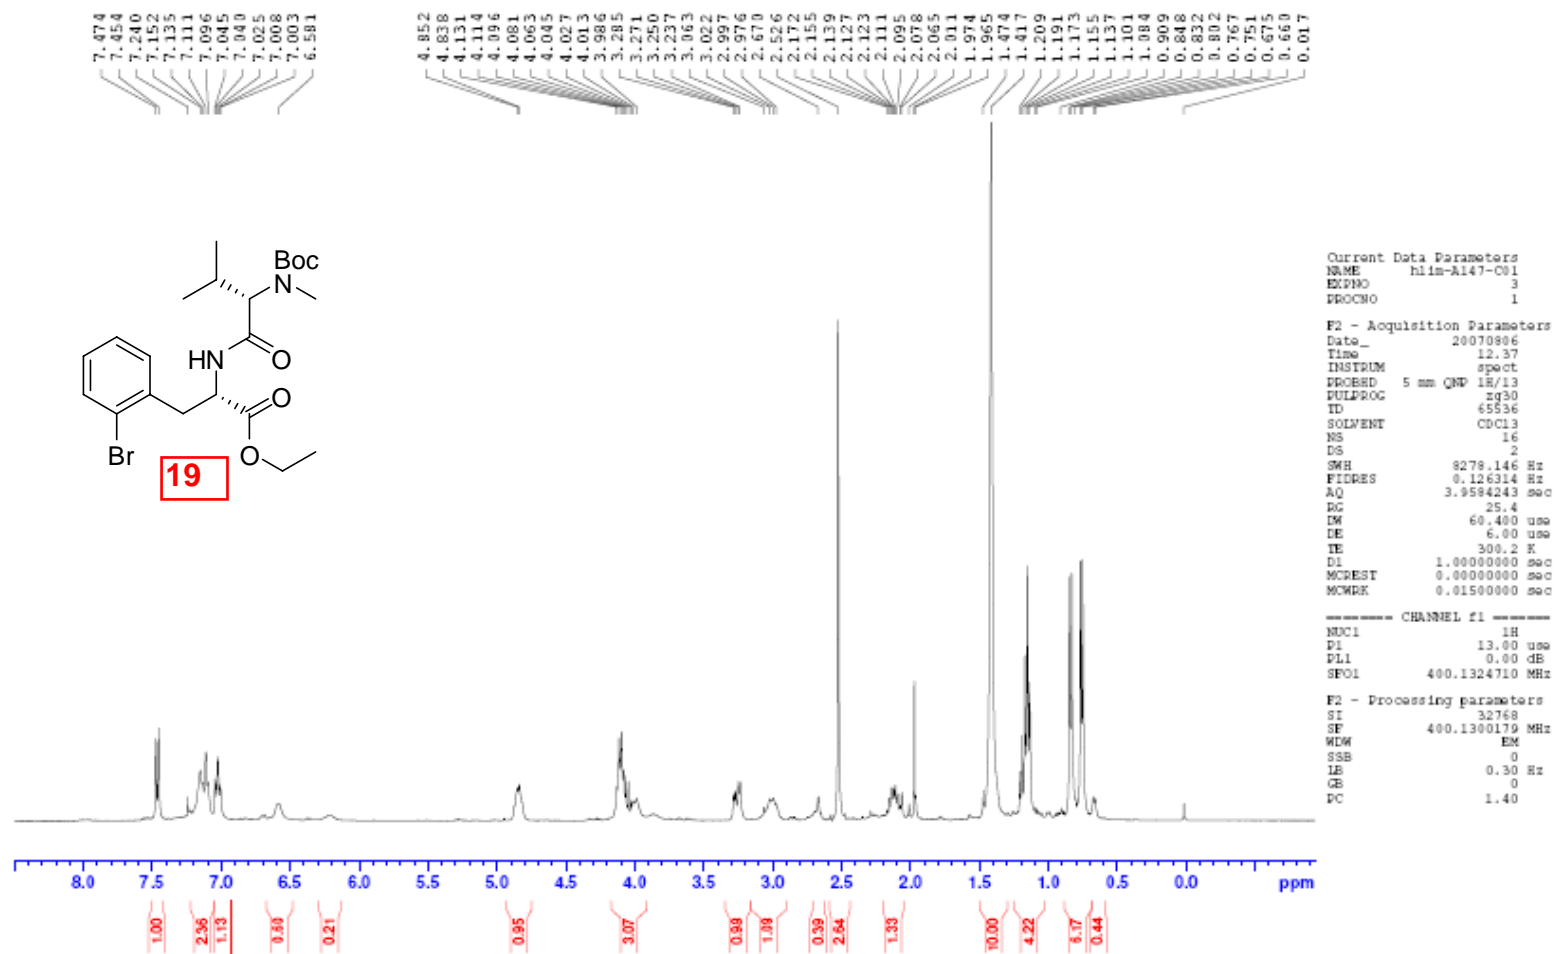

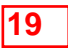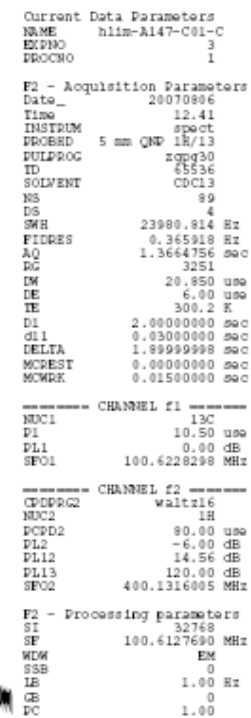

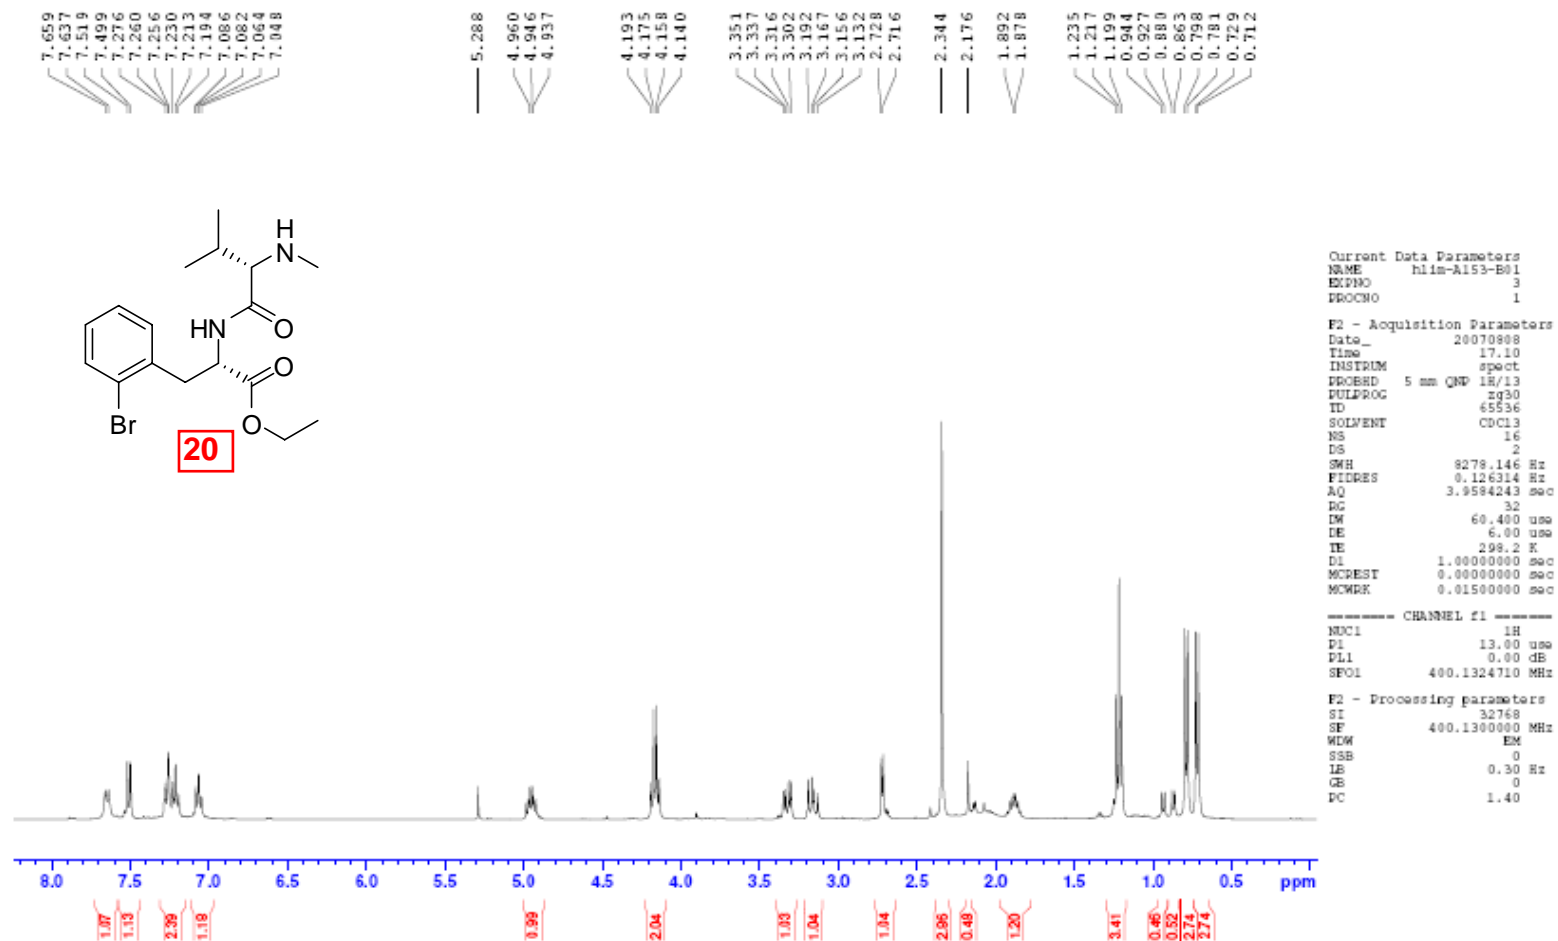

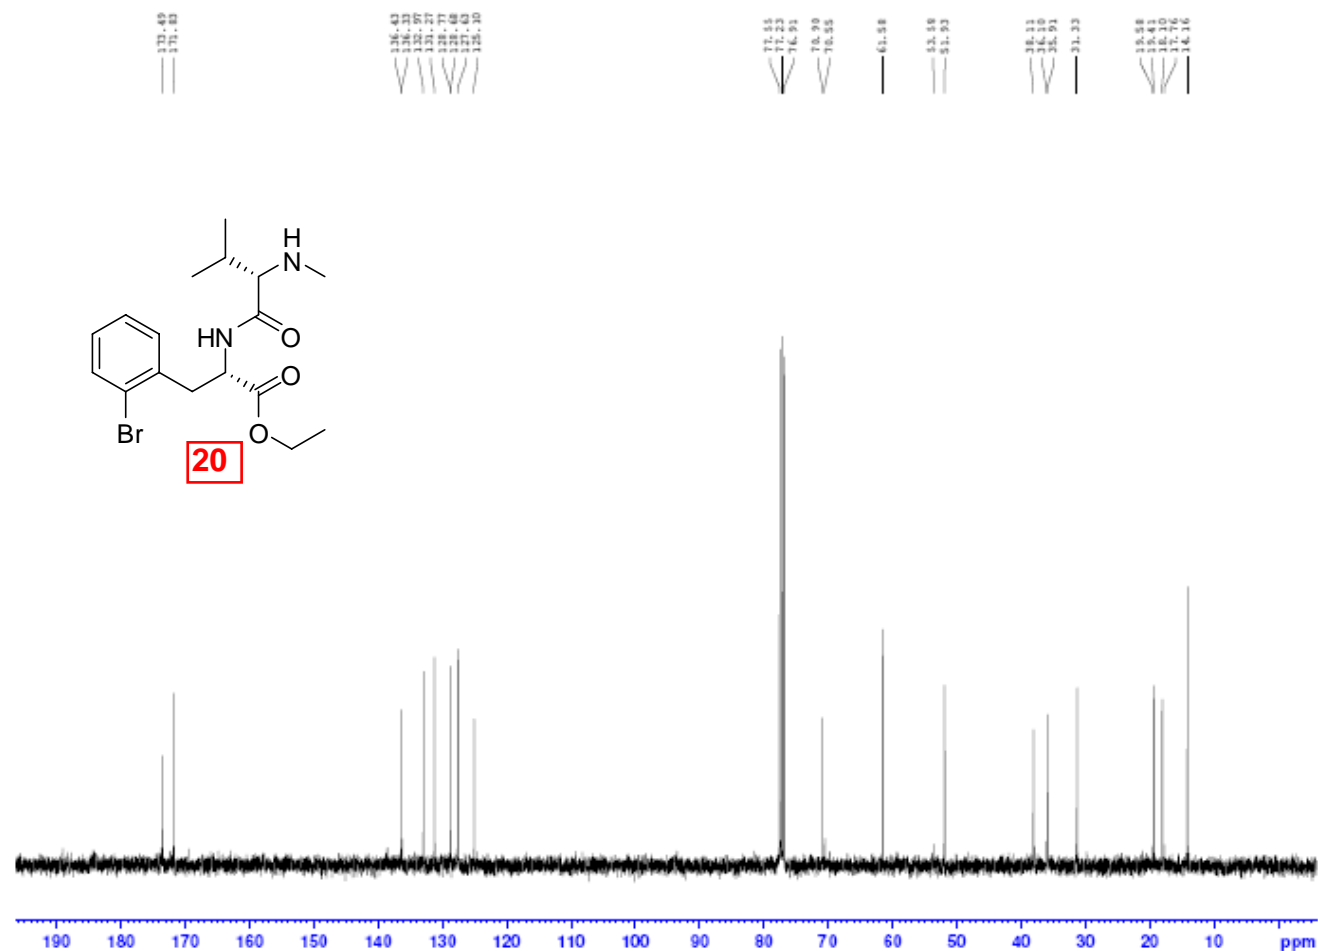

Current Data Parameters  
NAME hlm-A153-B01-C  
EXPNO 3  
PROCNO 1

F2 - Acquisition Parameters  
Date\_ 20070808  
Time 17.14  
INSTRUM spect  
PROBHD 5 mm QNP 1H/13  
PULPROG zgpg30  
TD 65536  
SOLVENT CDCl3  
NS 78  
DS 4  
SWH 23980.814 Hz  
FIDRES 0.365918 Hz  
AQ 1.3664756 sec  
RG 4597.6  
DM 20.850 usec  
DE 6.00 usec  
TE 298.2 K  
D1 2.00000000 sec  
d11 0.03000000 sec  
DELTA 1.89999999 sec  
MCREST 0.00000000 sec  
MCMRK 0.01500000 sec

----- CHANNEL f1 -----  
NUC1 13C  
P1 10.50 usec  
PL1 0.00 dB  
SFO1 100.6228298 MHz

----- CHANNEL f2 -----  
CPDPRG2 waltz16  
NUC2 1H  
PCPD2 80.00 usec  
PL2 -6.00 dB  
PL12 14.56 dB  
PL13 120.00 dB  
SFO2 400.1316005 MHz

F2 - Processing parameters  
SI 32768  
SF 100.6127571 MHz  
WDW EM  
SSB 0  
LB 1.00 Hz  
GB 0  
PC 1.40

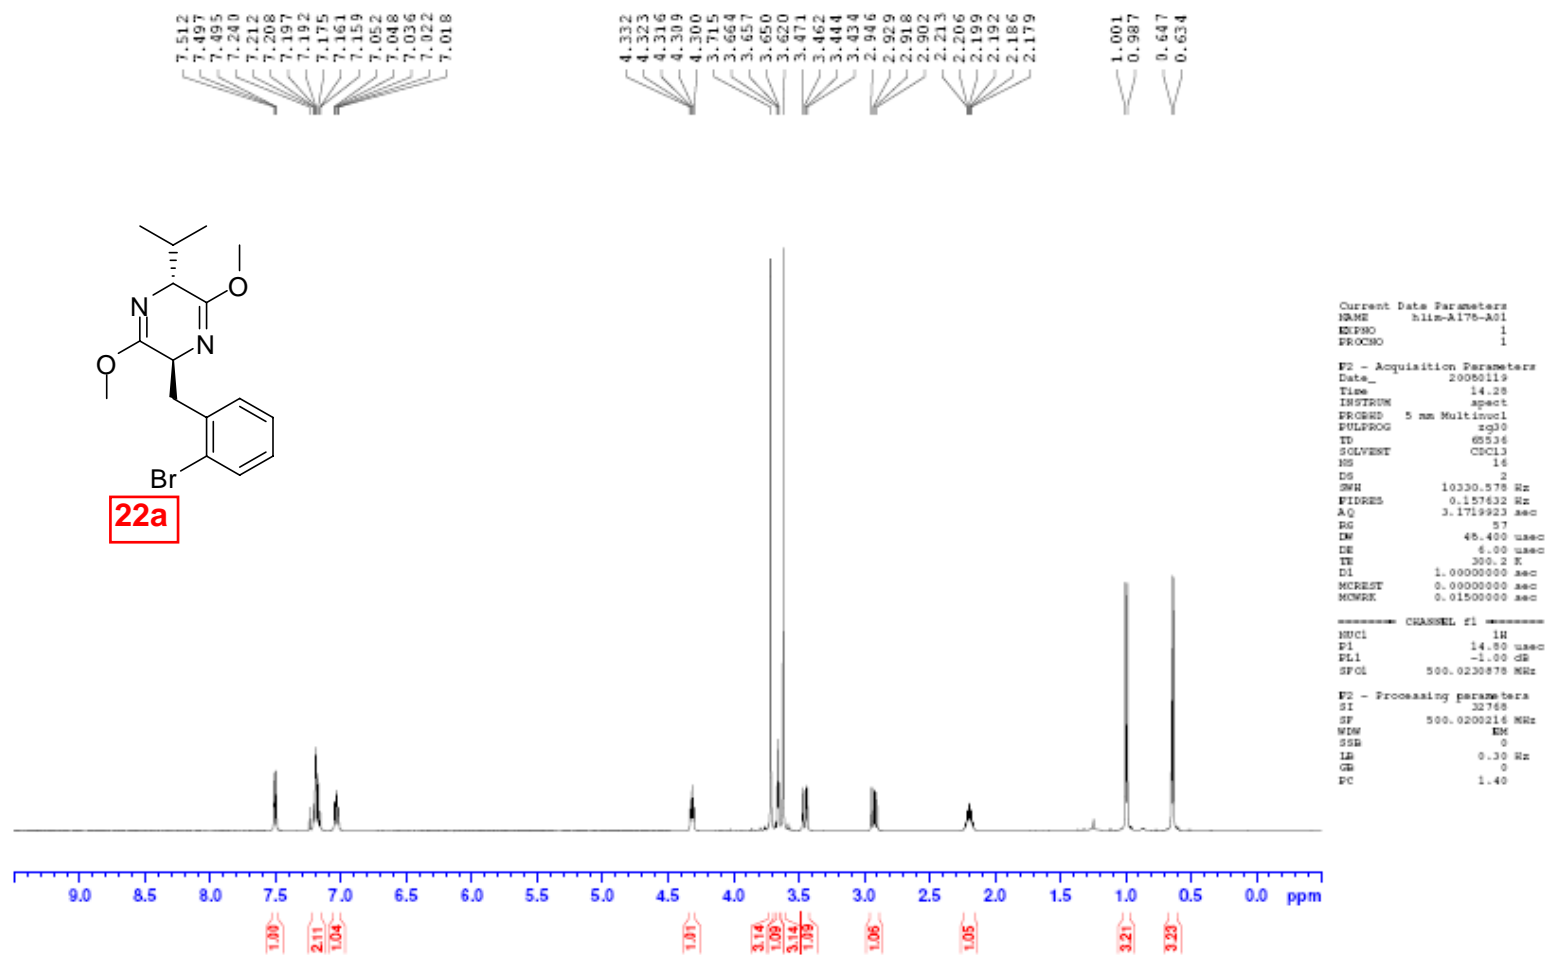



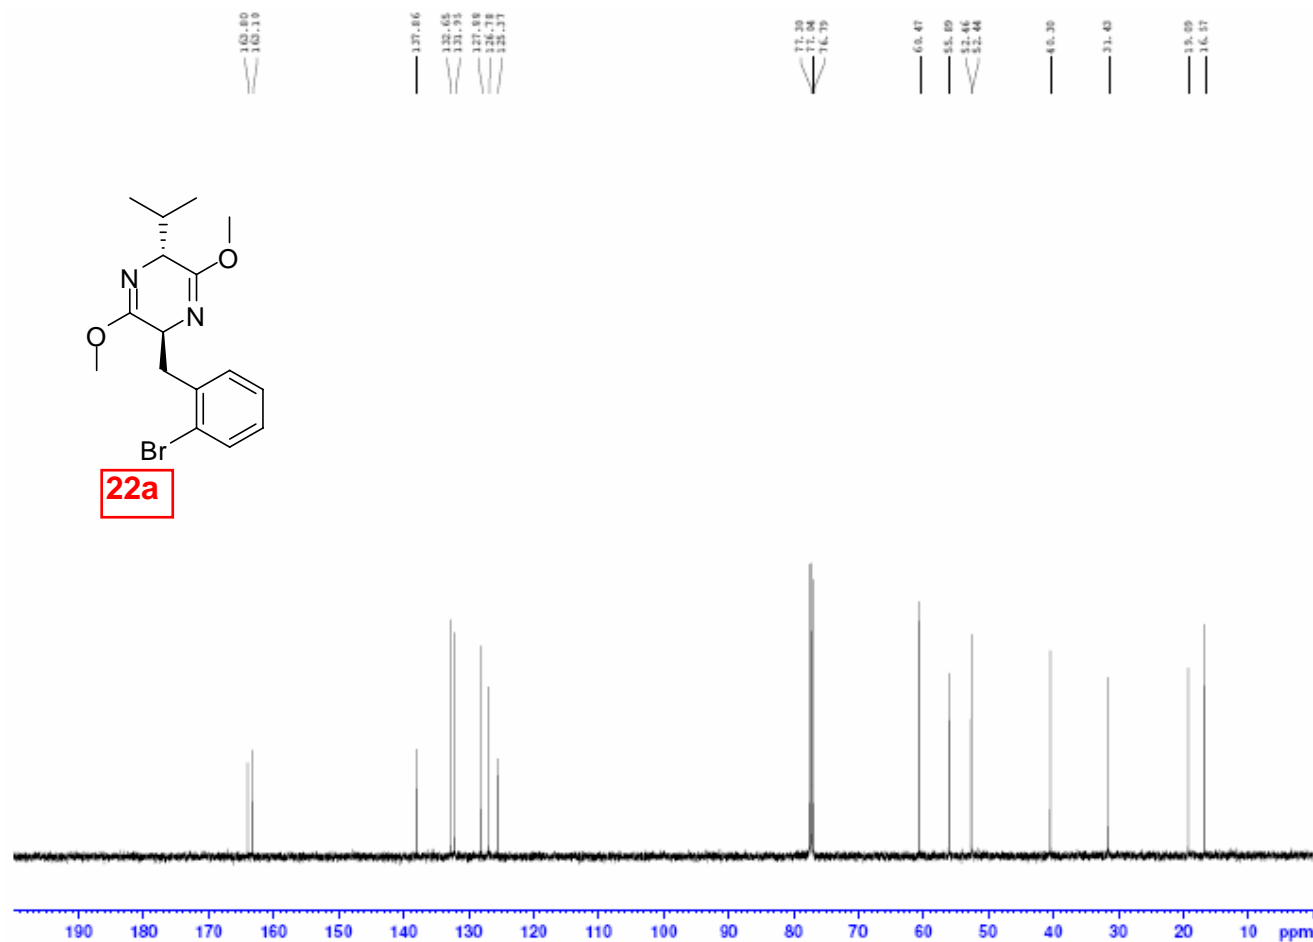

Current Data Parameters  
NAME hlm-A175-A01-C  
EXPNO 1  
PROCNO 1

F2 - Acquisition Parameters  
Date\_ 20080119  
Time 14.33  
INSTRUM spect  
PROBHD 5 mm Multinucl  
PULPROG zgpg30  
TD 65536  
SOLVENT CDCl3  
NS 27  
DS 4  
SWH 30030.029 Hz  
FIDRES 0.459222 Hz  
AQ 1.0912244 sec  
RG 2590.3  
DM 16.650 usec  
DE 12.00 usec  
TE 300.2 K  
D1 2.0000000 sec  
d11 0.0300000 sec  
DELTA 1.8999999 sec  
NOREST 0.0000000 sec  
NCHSE 0.0150000 sec

===== CHANNEL f1 =====  
NUC1 13C  
P1 12.00 usec  
PL1 3.00 dB  
SFO1 125.7427020 MHz  
  
===== CHANNEL f2 =====  
CPDPRG2 waltz16  
NUC2 1H  
PCPD2 100.00 usec  
PL2 -1.00 dB  
PL12 19.50 dB  
PL13 22.50 dB  
SFO2 500.0220001 MHz

F2 - Processing parameters  
SI 32768  
SF 125.7301290 MHz  
WDW EM  
SSB 0  
LB 1.00 Hz  
GB 0  
PC 1.00

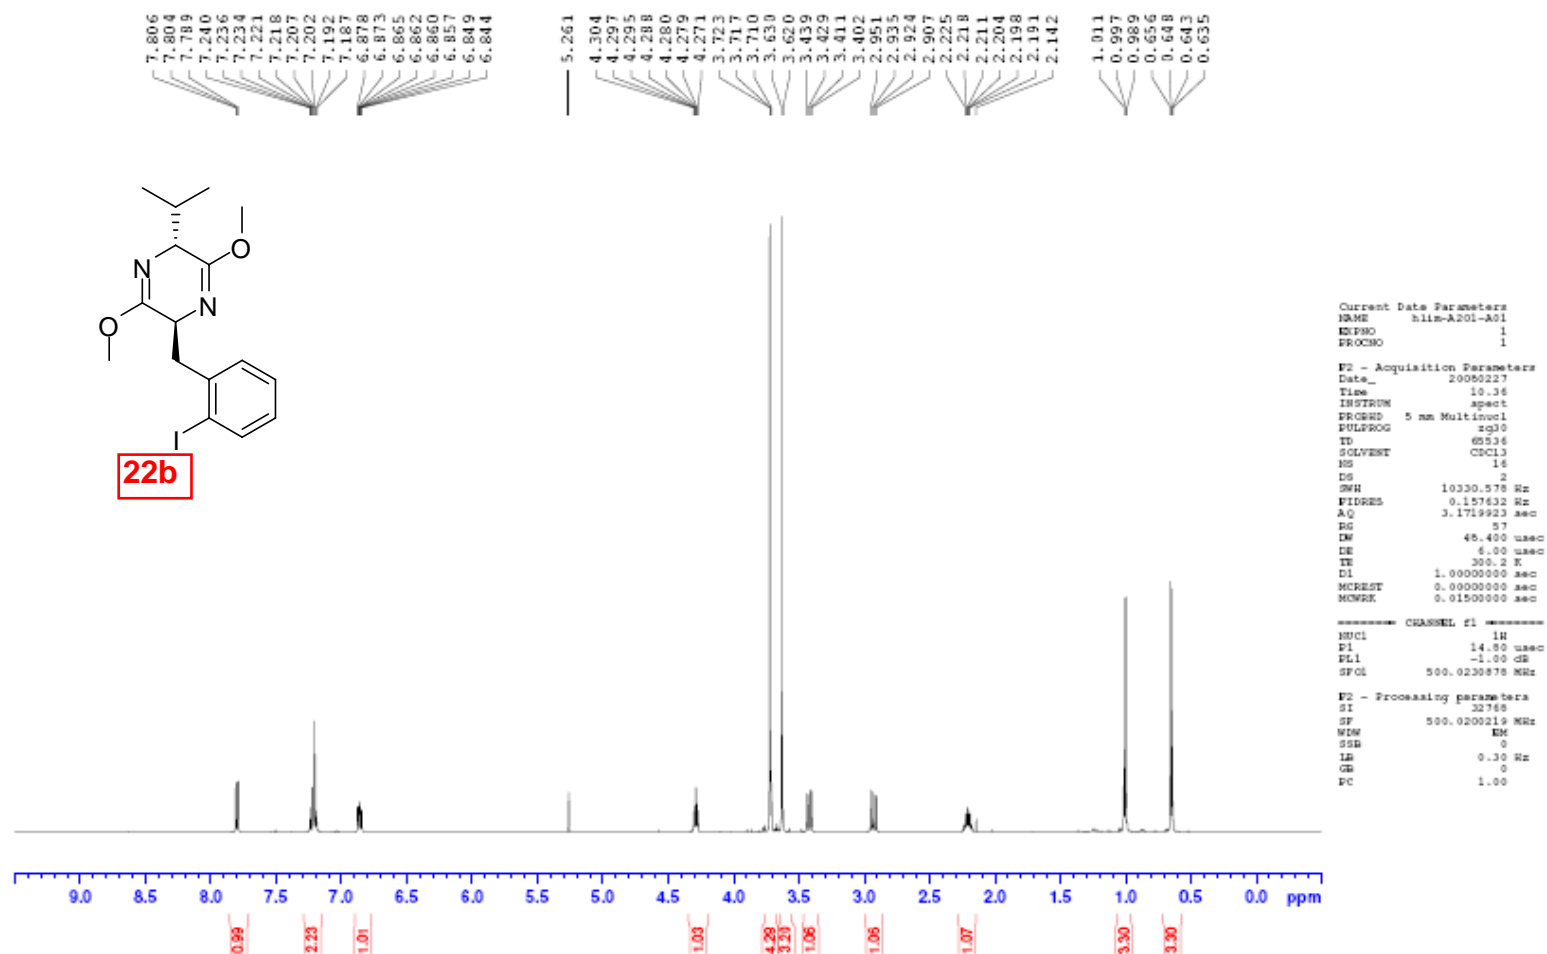

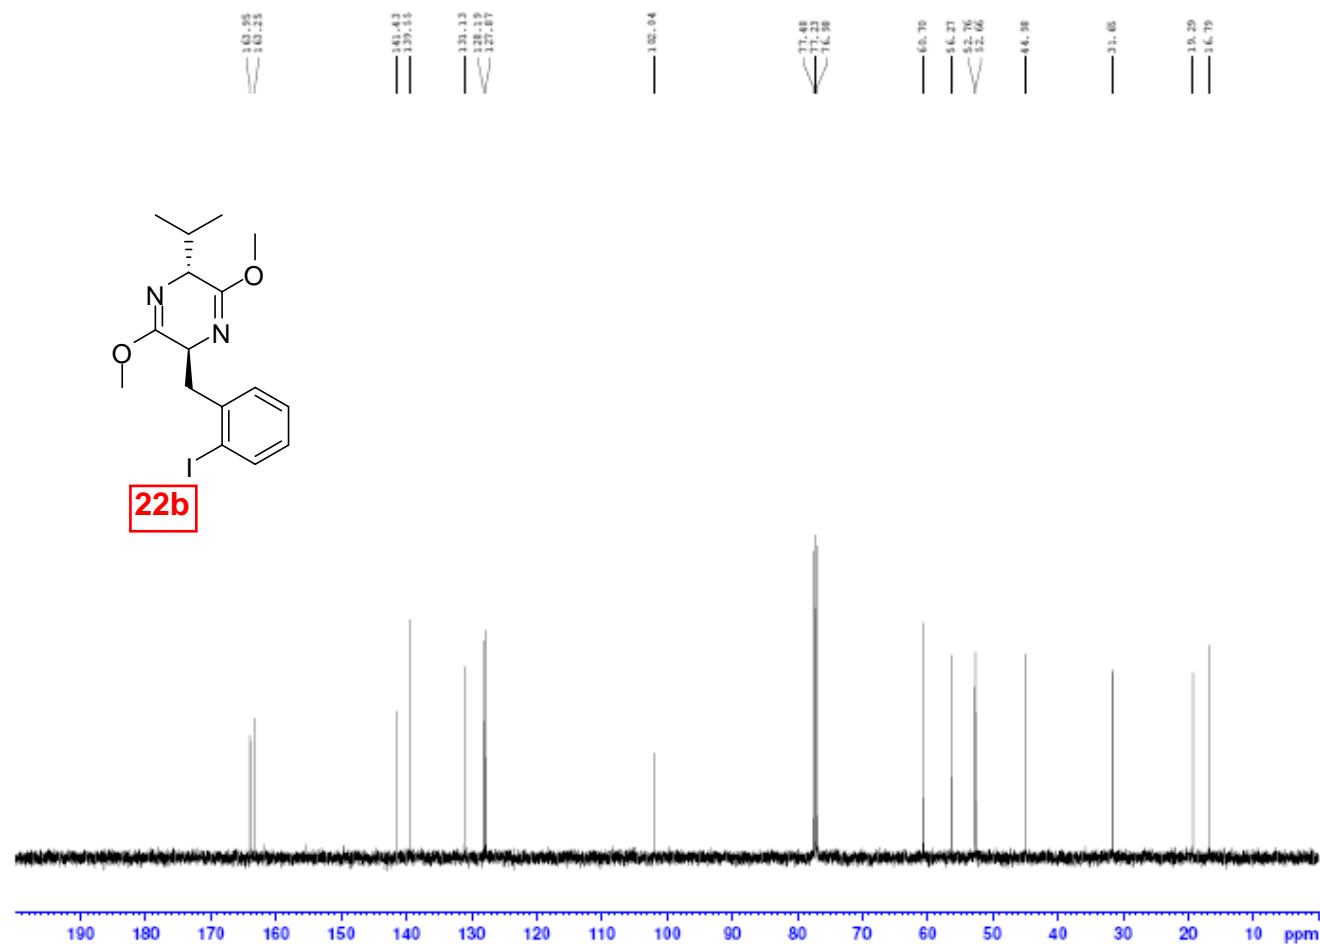

Current Data Parameters  
NAME hlm-A201-A01-C  
EXPNO 1  
PROCNO 1

F2 - Acquisition Parameters  
Date\_ 20080227  
Time 10.42  
INSTRUM spect  
PROBHD 5 mm Multinucl  
PULPROG zgpg30  
TD 65536  
SOLVENT CDCl3  
NS 20  
DS 4  
SWH 30030.029 Hz  
FIDRES 0.459222 Hz  
AQ 1.0912244 sec  
RG 3649.1  
DM 16.650 usec  
DE 12.00 usec  
TE 300.2 K  
d1 2.0000000 sec  
d11 0.0300000 sec  
DELTA 1.8999999 sec  
NOREST 0.0000000 sec  
NOREF 0.0150000 sec

===== CHANNEL f1 =====  
NUC1 13C  
P1 12.00 usec  
PL1 3.00 dB  
SFO1 125.7427020 MHz

===== CHANNEL f2 =====  
CPDPRG2 waltz16  
NUC2 1H  
PCPD2 100.00 usec  
PL2 -1.00 dB  
PL12 19.50 dB  
PL13 22.50 dB  
SFO2 500.0220001 MHz

F2 - Processing parameters  
SI 32768  
SF 125.7301078 MHz  
WDW EM  
SSB 0  
LB 1.00 Hz  
GB 0  
PC 1.00

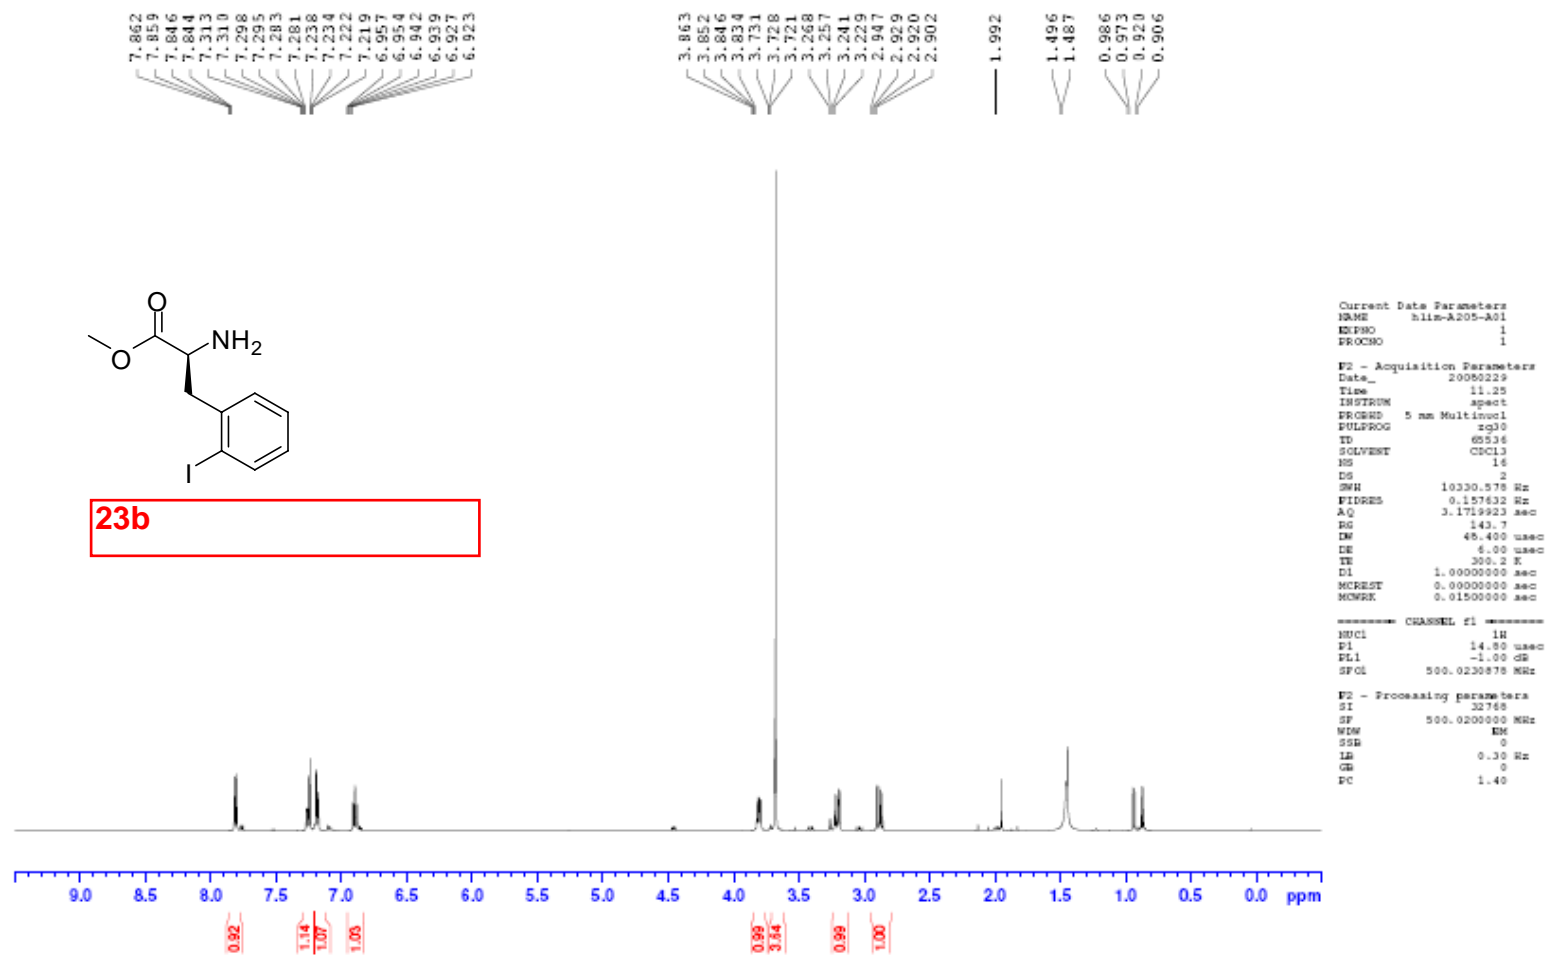

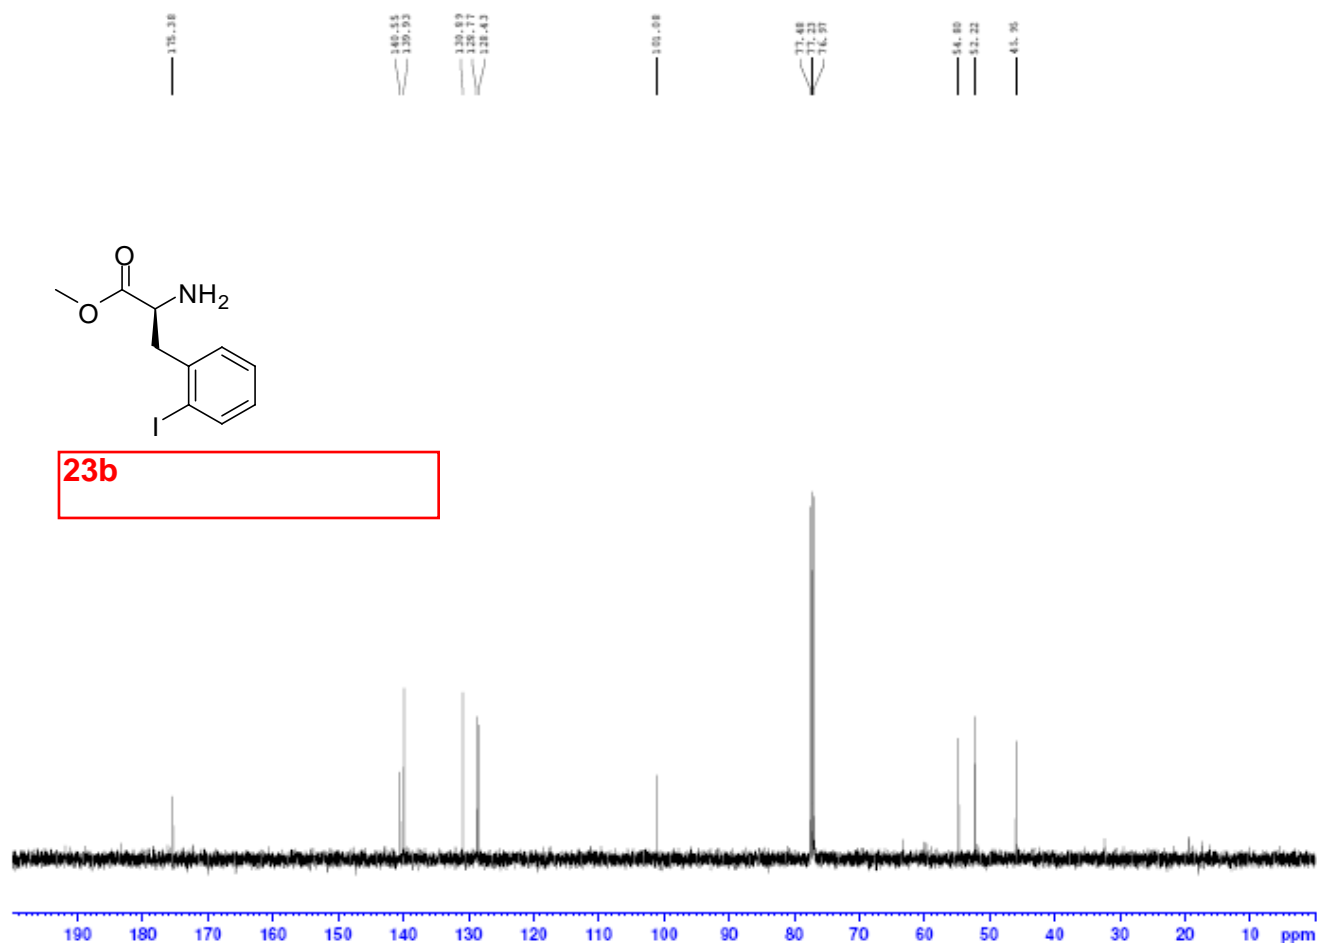

```

Current Data Parameters
NAME      h1is-A205-A01-C
EXPNO     1
PROCNO    1

F2 - Acquisition Parameters
Date_     20080229
Time      11.31
INSTRUM   spect
PROBHD    5 mm Multinuc1
PULPROG   zgpg30
TD        65536
SOLVENT   CDCl3
NS         21
DS         4
SWH        30030.029 Hz
FIDRES     0.458222 Hz
AQ         1.0912244 sec
RG         5792.6
SW         16.650 usec
DE         12.00 usec
TE         300.2 K
D1         2.00000000 sec
d11        0.03000000 sec
DELTA      1.89999998 sec
NOREST     0.00000000 sec
NOREF      0.01500000 sec

===== CHANNEL f1 =====
NUC1       13C
P1         12.00 usec
PL1        0.00 dB
SFO1       125.7427020 MHz

===== CHANNEL f2 =====
CPDPRG2    waltz16
NUC2       1H
PCPD2      100.00 usec
PL2        -1.00 dB
PL12       19.50 dB
PL13       22.50 dB
SFO2       500.0220001 MHz

F2 - Processing parameters
SI         32768
SF         125.7301097 MHz
WDW        EM
SSB        0
LB         1.00 Hz
GB         0
PC         1.00

```

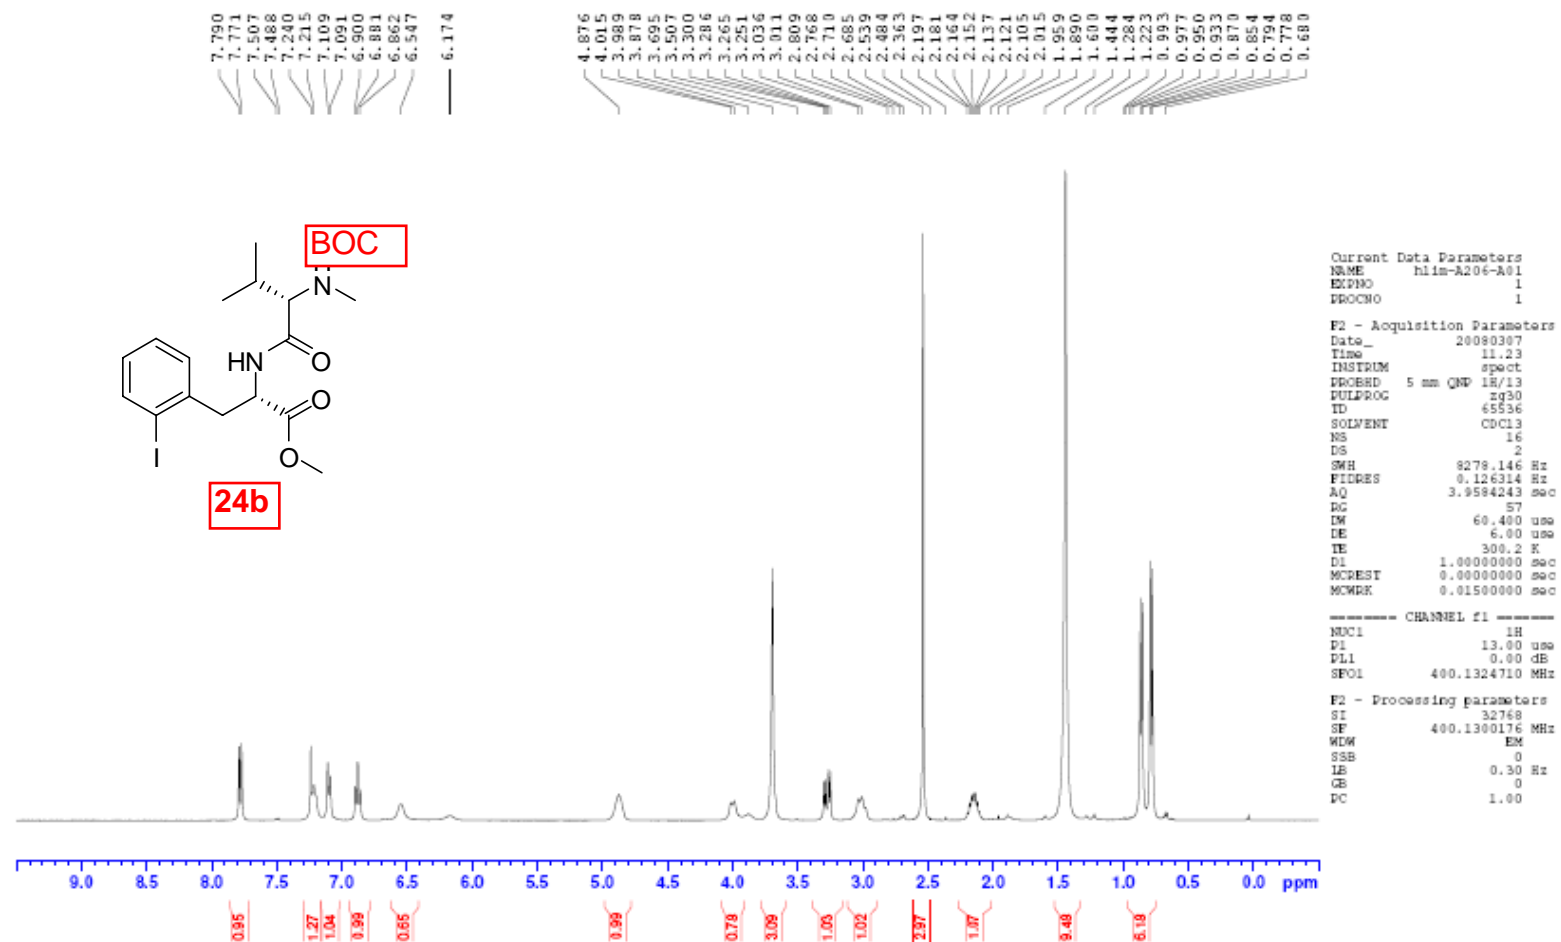

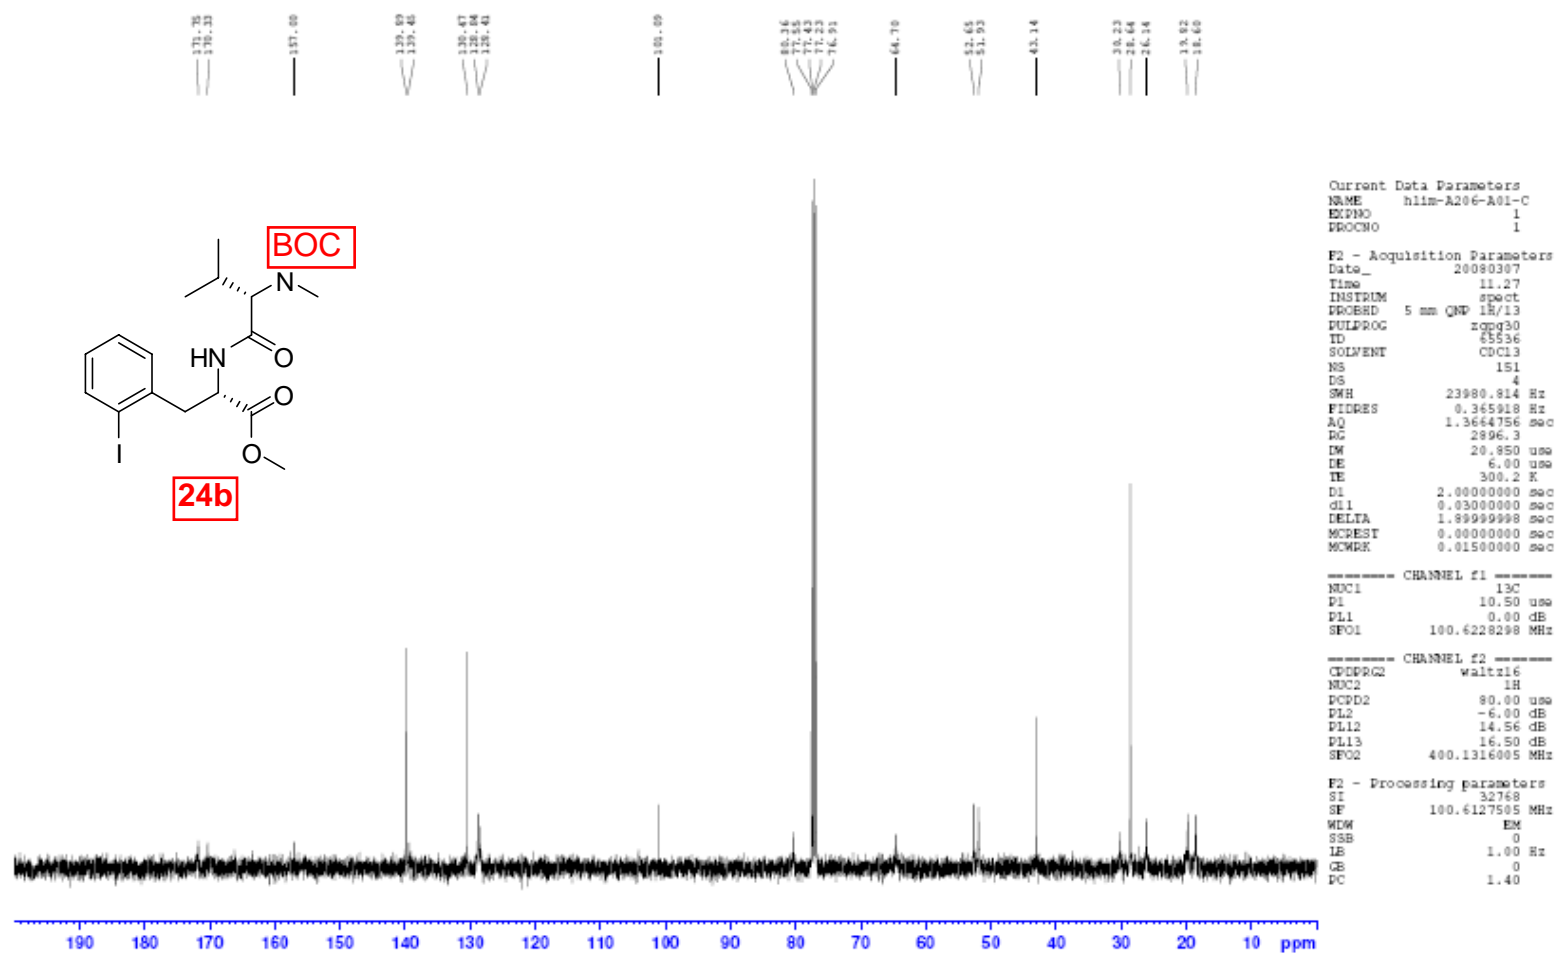

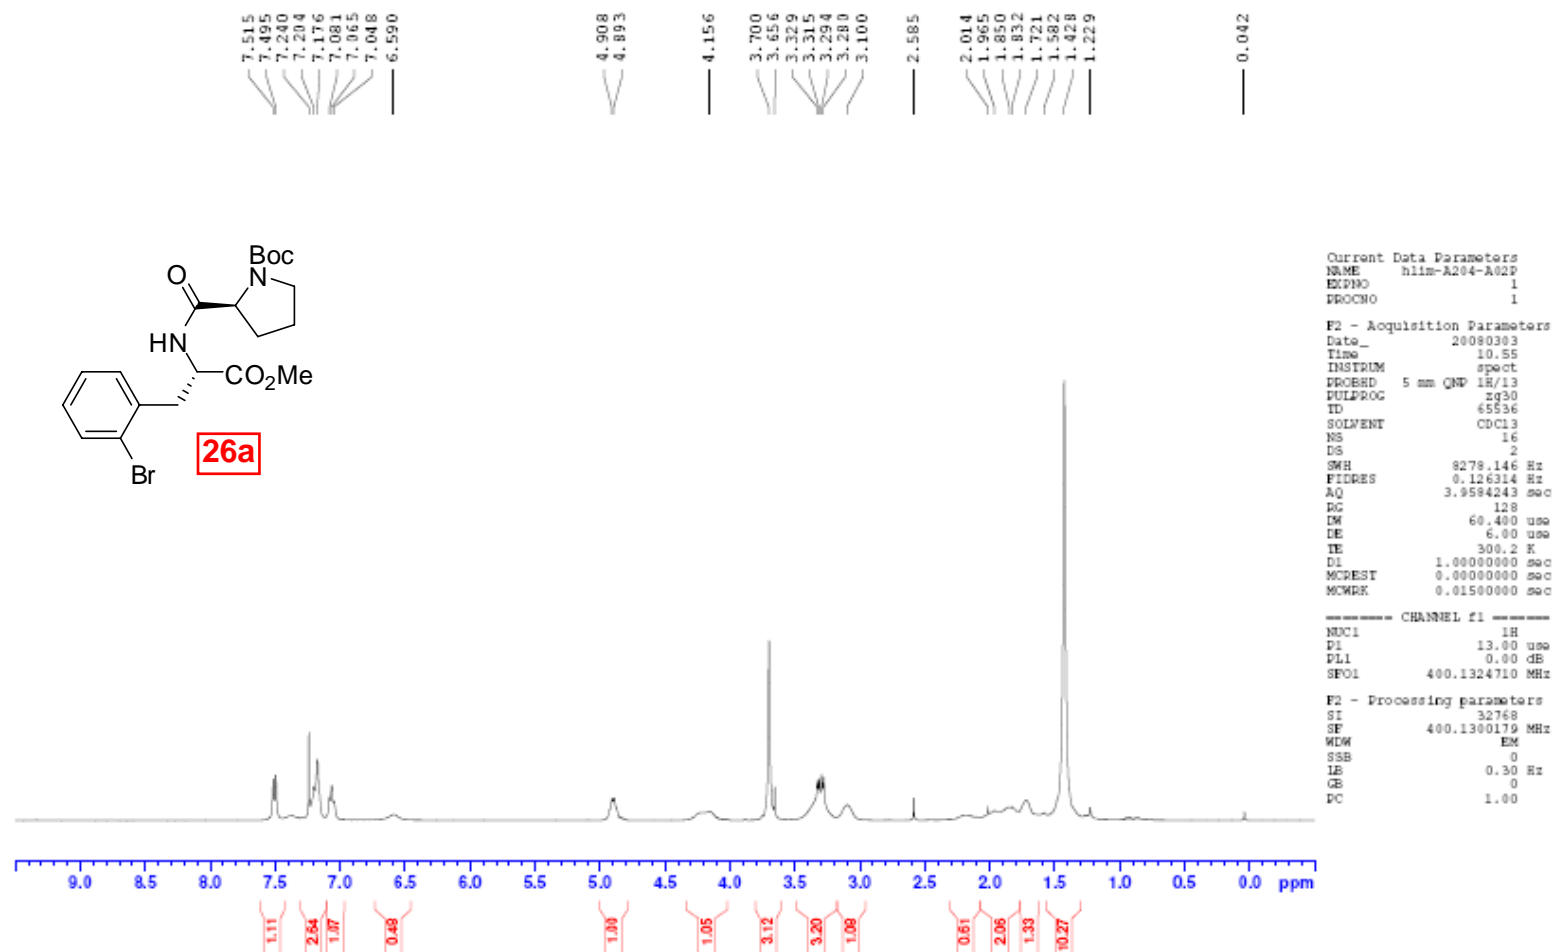



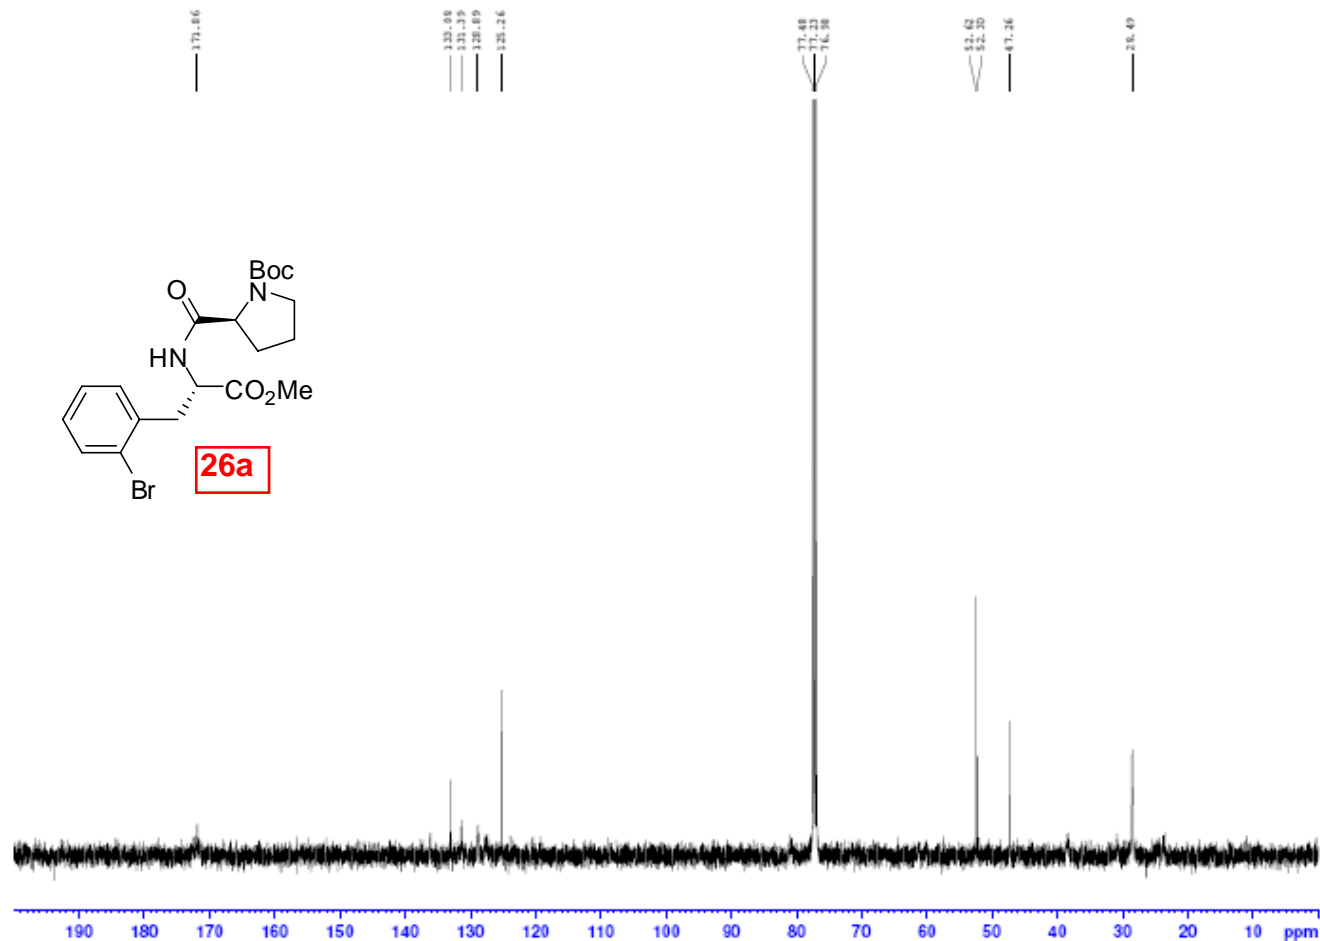

```

Current Data Parameters
NAME      h1is-A204-A02P-C
EXPNO     1
PROCNO    1

F2 - Acquisition Parameters
Date_     20080307
Time      16.27
INSTRUM   spect
PROBHD    5 mm Multinucl
PULPROG   zgpg30
TD         65536
SOLVENT   CDCl3
NS         597
DS         4
SWH        30030.029 Hz
FIDRES     0.458222 Hz
AQ         1.0912244 sec
RG          3251
SW         16.650 usec
DE         12.00 usec
TE         300.2 K
D1         2.00000000 sec
d11        0.03000000 sec
DELTA      1.89999998 sec
HOREST     0.00000000 sec
HOREST     0.01500000 sec

===== CHANNEL f1 =====
NUC1       13C
P1         12.00 usec
PL1        3.00 dB
SFO1       125.7427020 MHz

===== CHANNEL f2 =====
CPDPRG2    waltz16
NUC2       1H
PCPD2      100.00 usec
PL2        -1.00 dB
PL12       19.50 dB
PL13       22.50 dB
SFO2       500.0220001 MHz

F2 - Processing parameters
SI         32768
SF         125.7301033 MHz
WDW        EM
SSB        0
LB         1.00 Hz
GB         0
PC         1.40

```

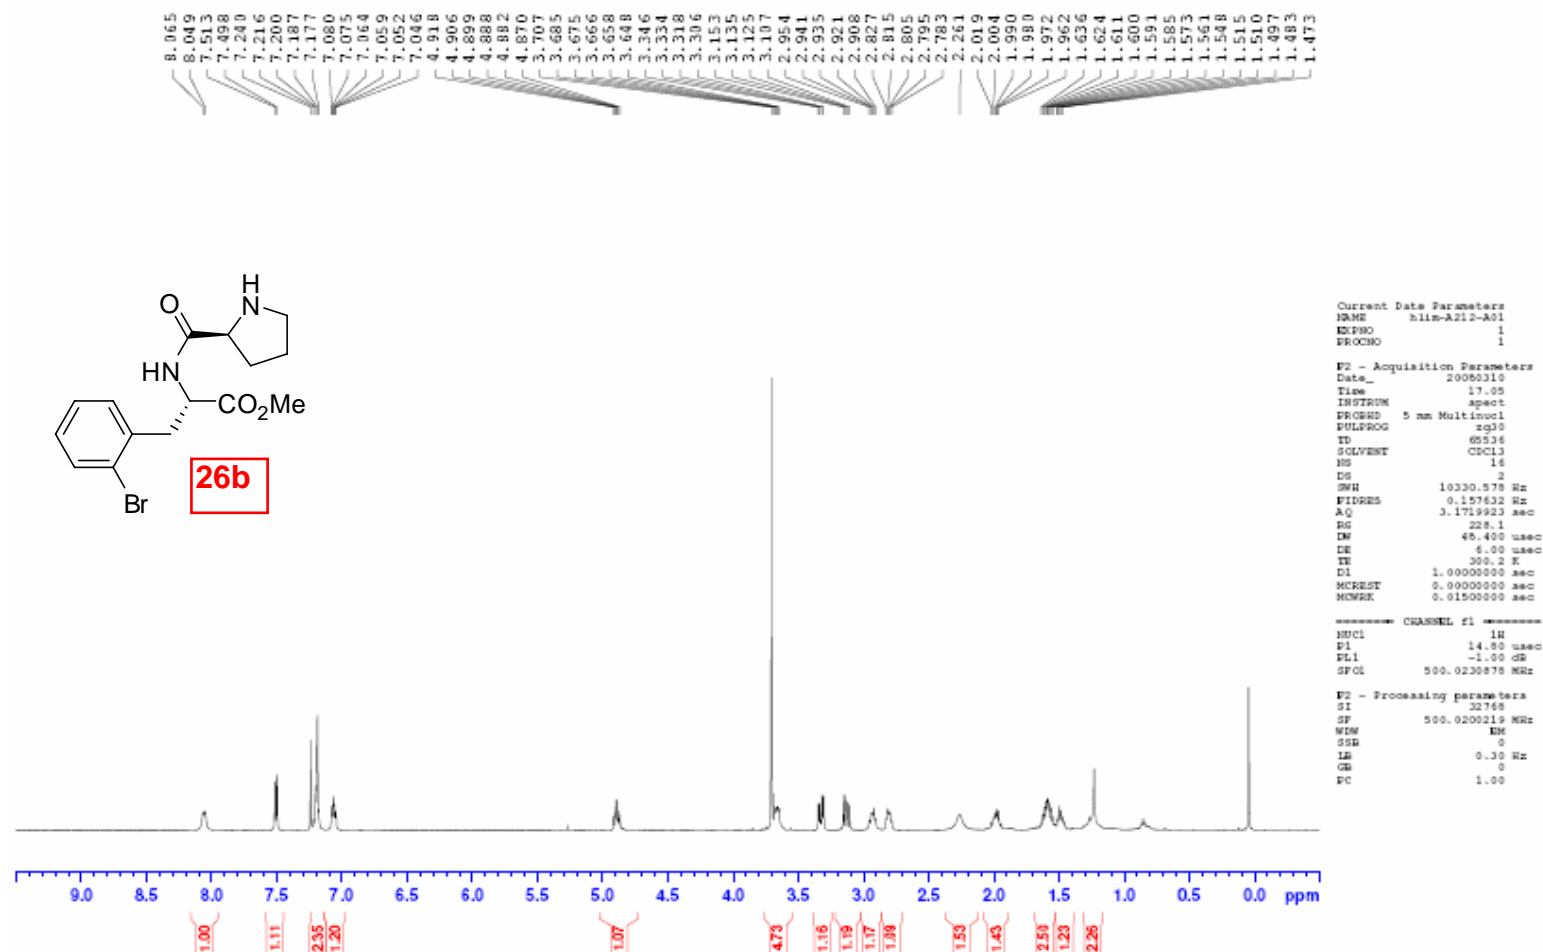

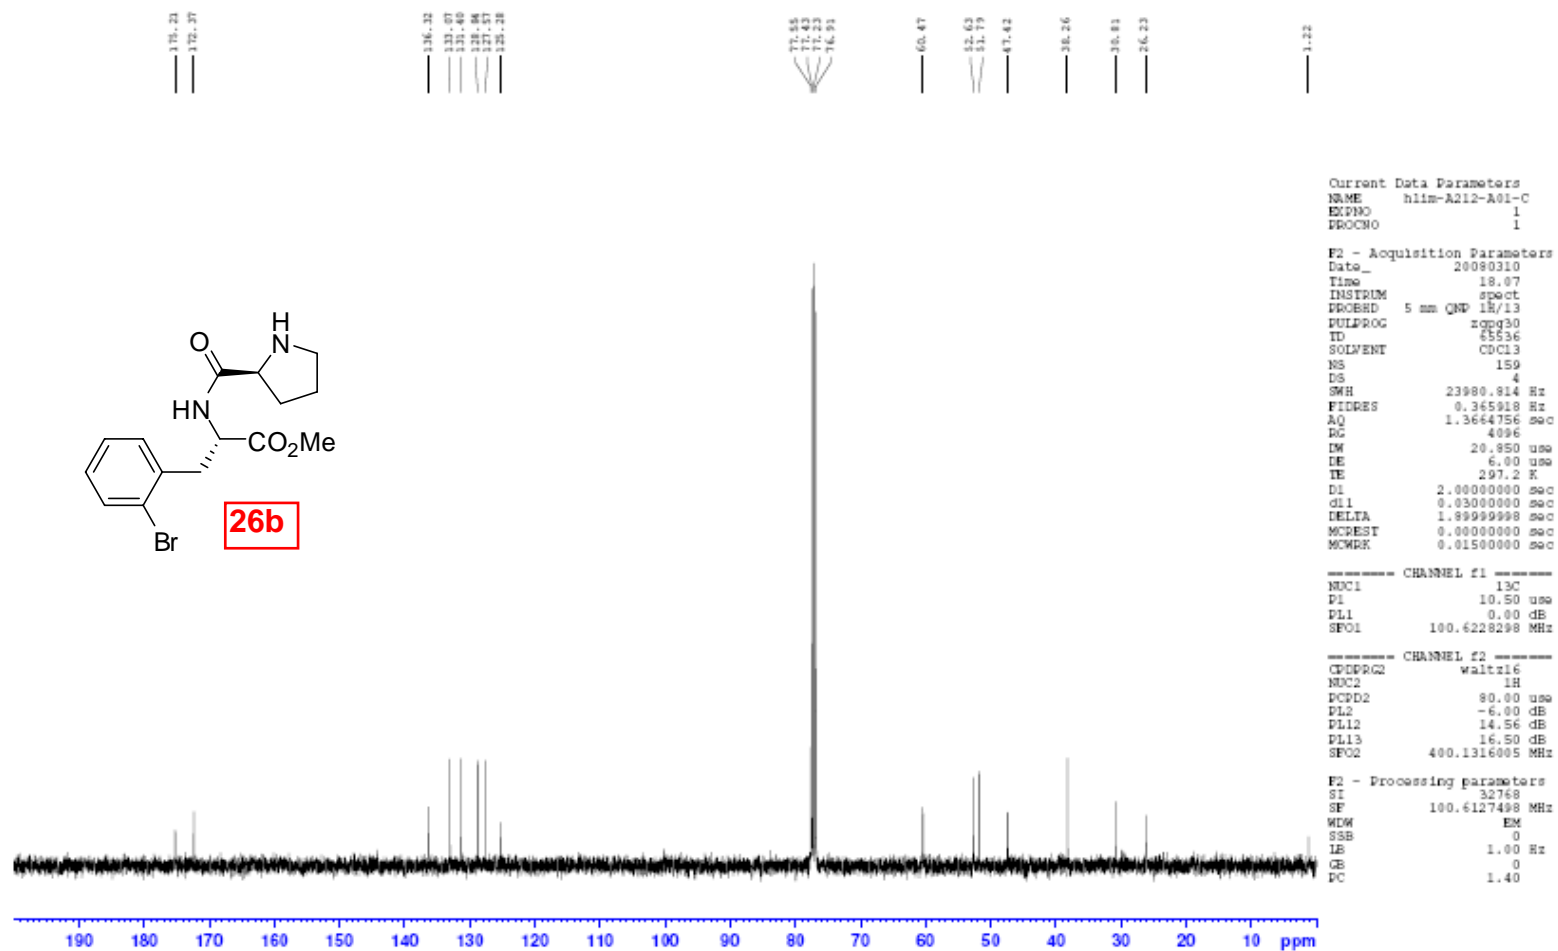

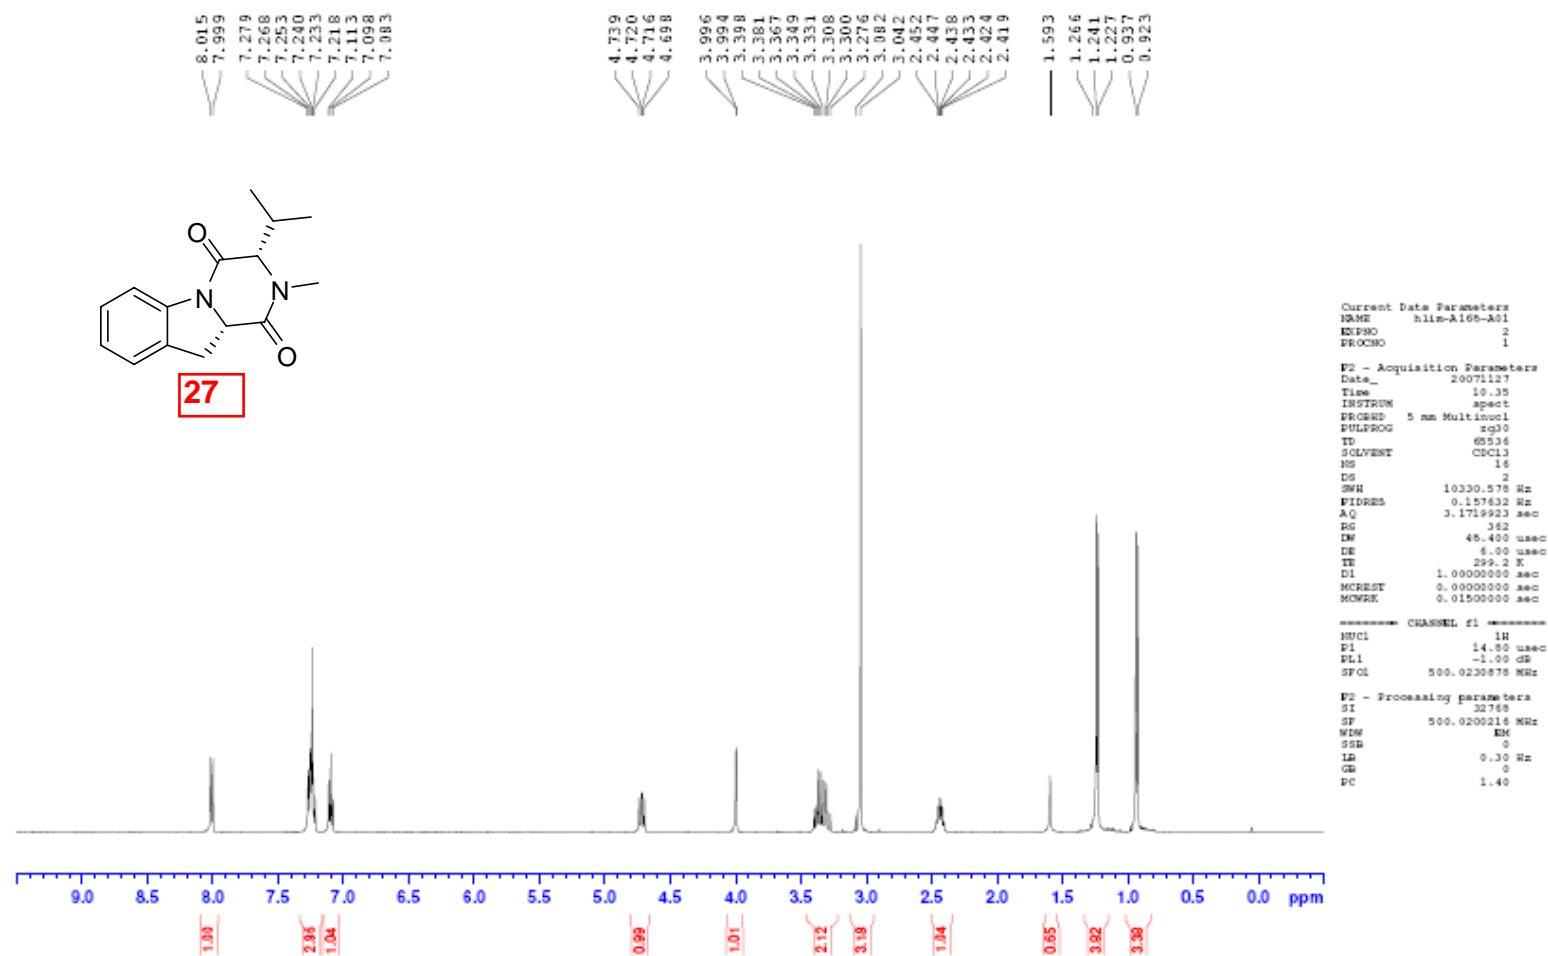

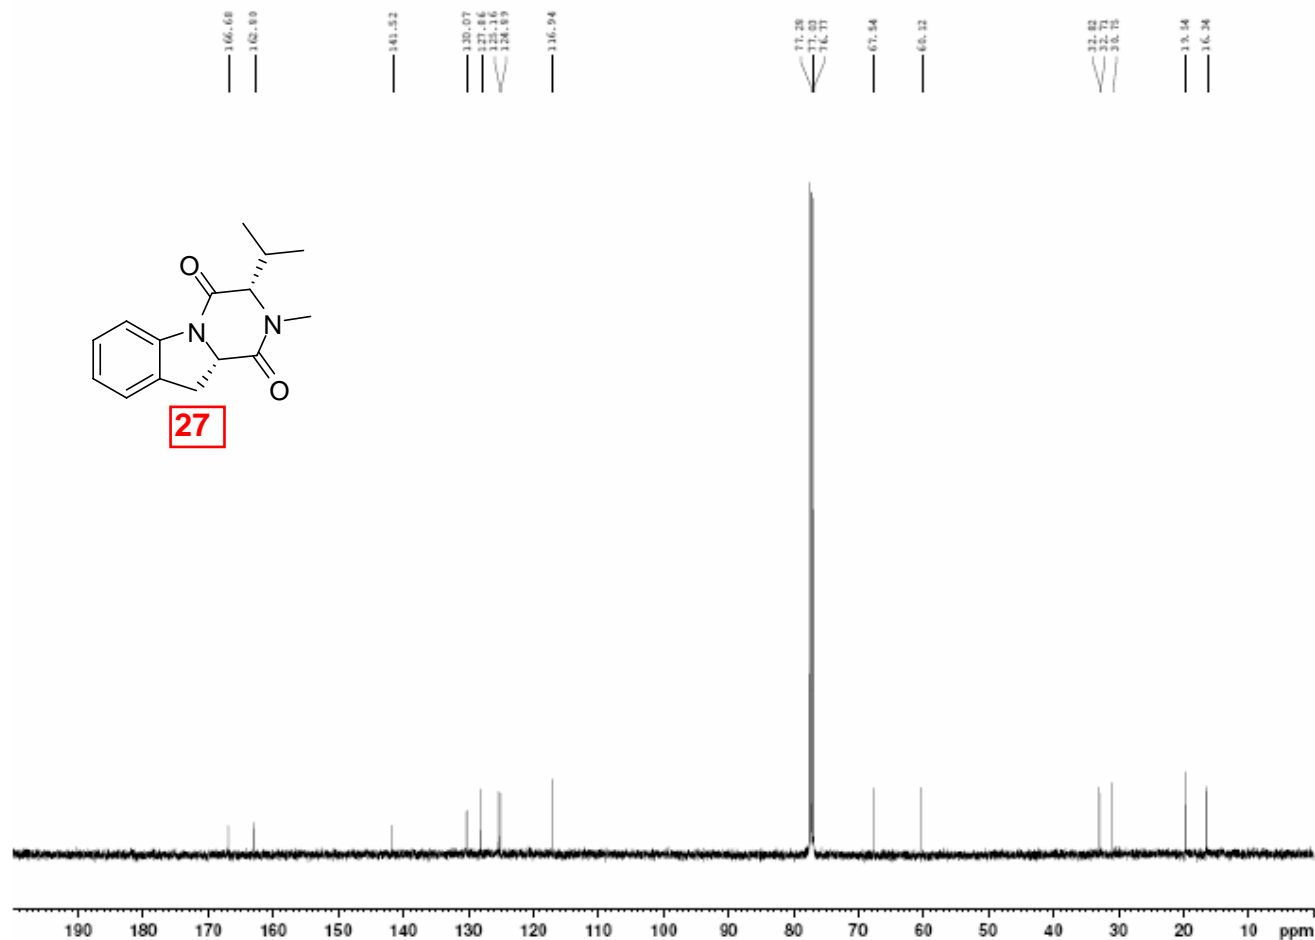

```

Current Data Parameters
NAME      h1a-A16-A01-C
EXPNO     1
PROCNO    1

F2 - Acquisition Parameters
Date_     20071127
Time      12.05
INSTRUM   spect
PROBHD    5 mm Multinucl
PULPROG   zgpg30
TD         65536
SOLVENT   CDCl3
NS         289
DS         4
SWH        20030.029 Hz
FIDRES     0.459222 Hz
AQ         1.0912244 sec
RG         645.1
SW         16.050 usec
DE         39.00 usec
TE         299.2 K
D1         2.0000000 sec
d11        0.0300000 sec
DELTA     1.8999999 sec
NOREST    0.0000000 sec
NOREF     0.0150000 sec

===== CHANNEL f1 =====
NUC1       13C
P1         12.00 usec
PL1        3.00 dB
SFO1       125.7427020 MHz

===== CHANNEL f2 =====
CPDPRG2    waltz16
NUC2       1H
PCPD2      100.00 usec
PL2         -1.00 dB
PL12       19.80 dB
PL13       22.50 dB
SFO2       500.0220001 MHz

F2 - Processing parameters
SI         32768
SF         125.7301290 MHz
WDW        EM
SSB        0
LB         1.00 Hz
GB         0
PC         1.40

```

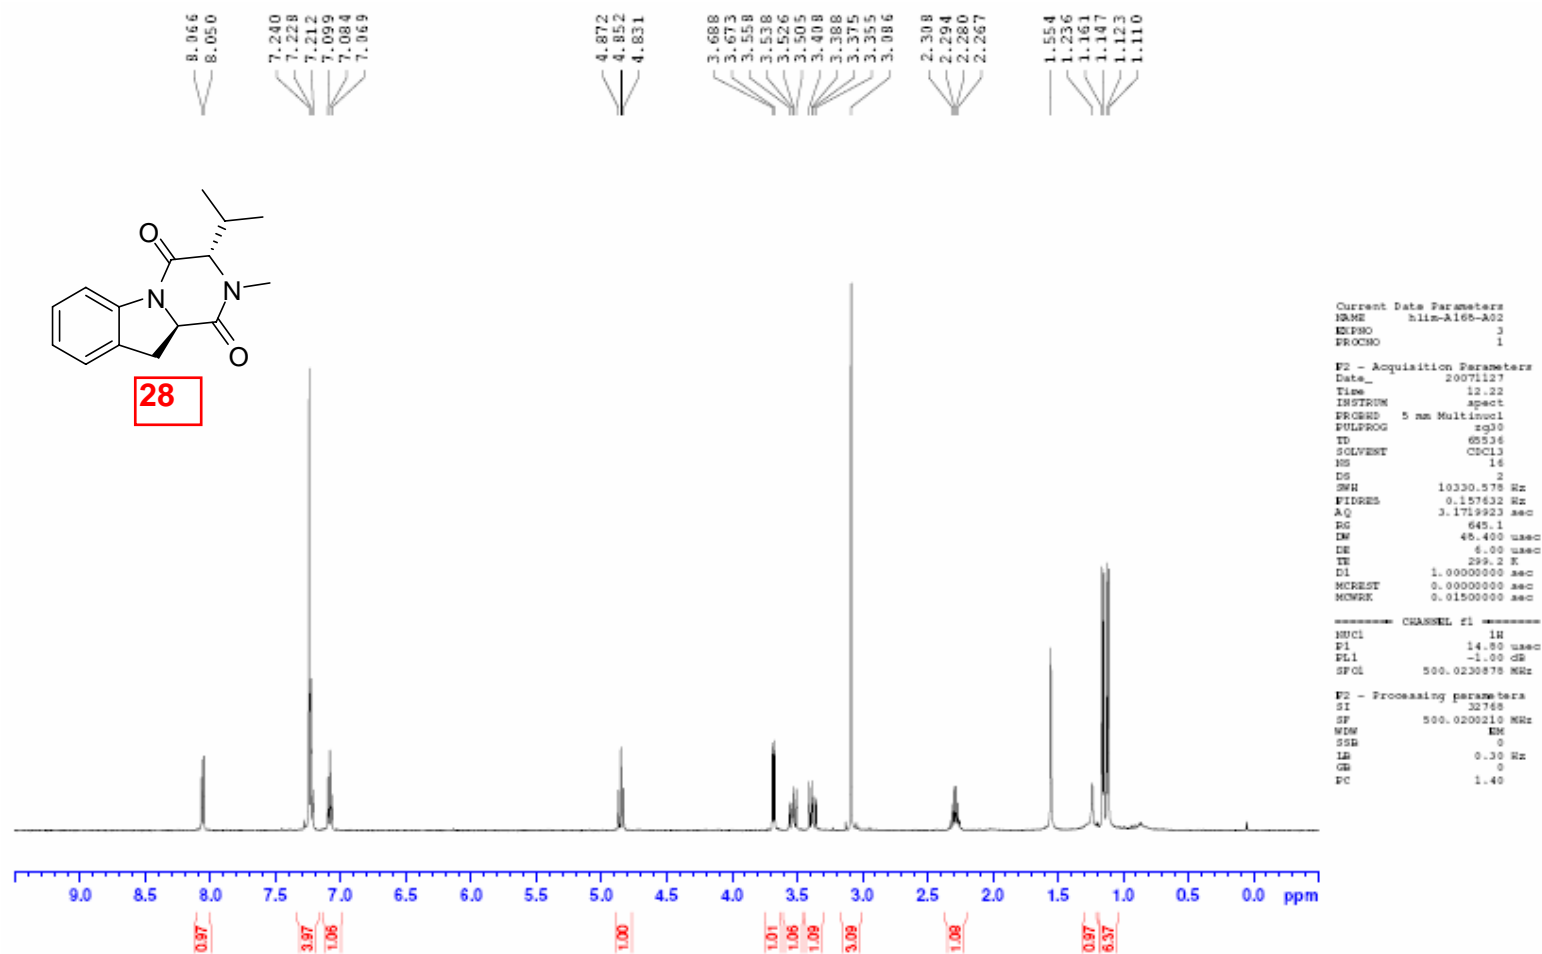

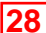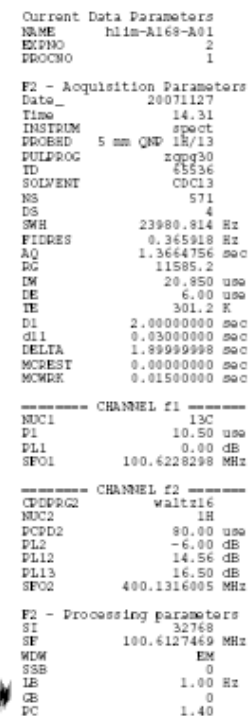

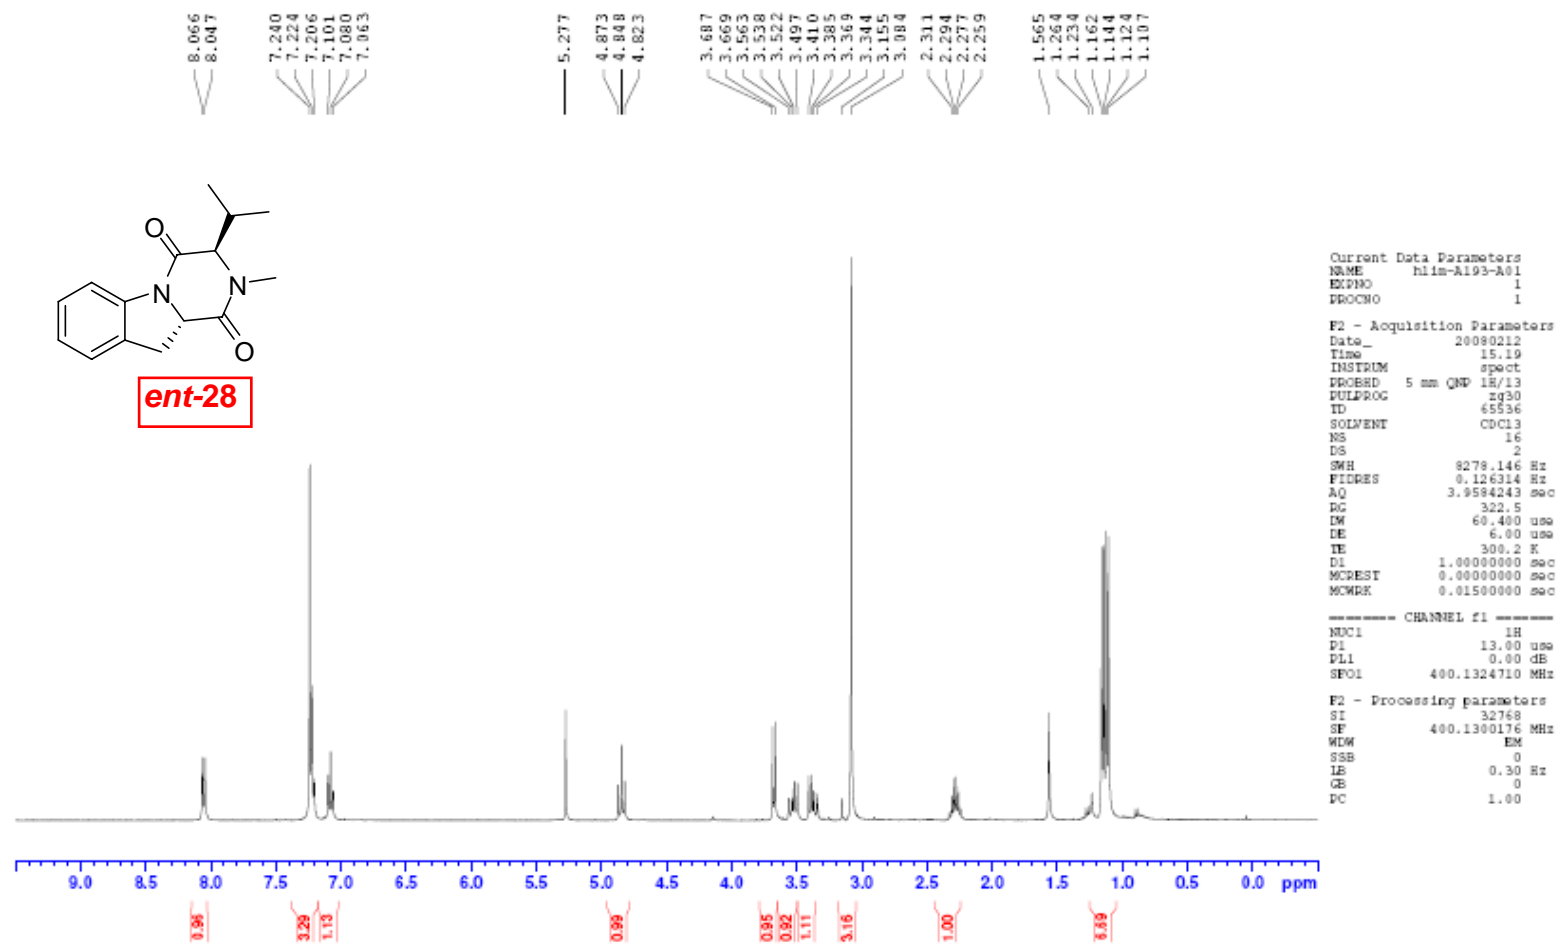



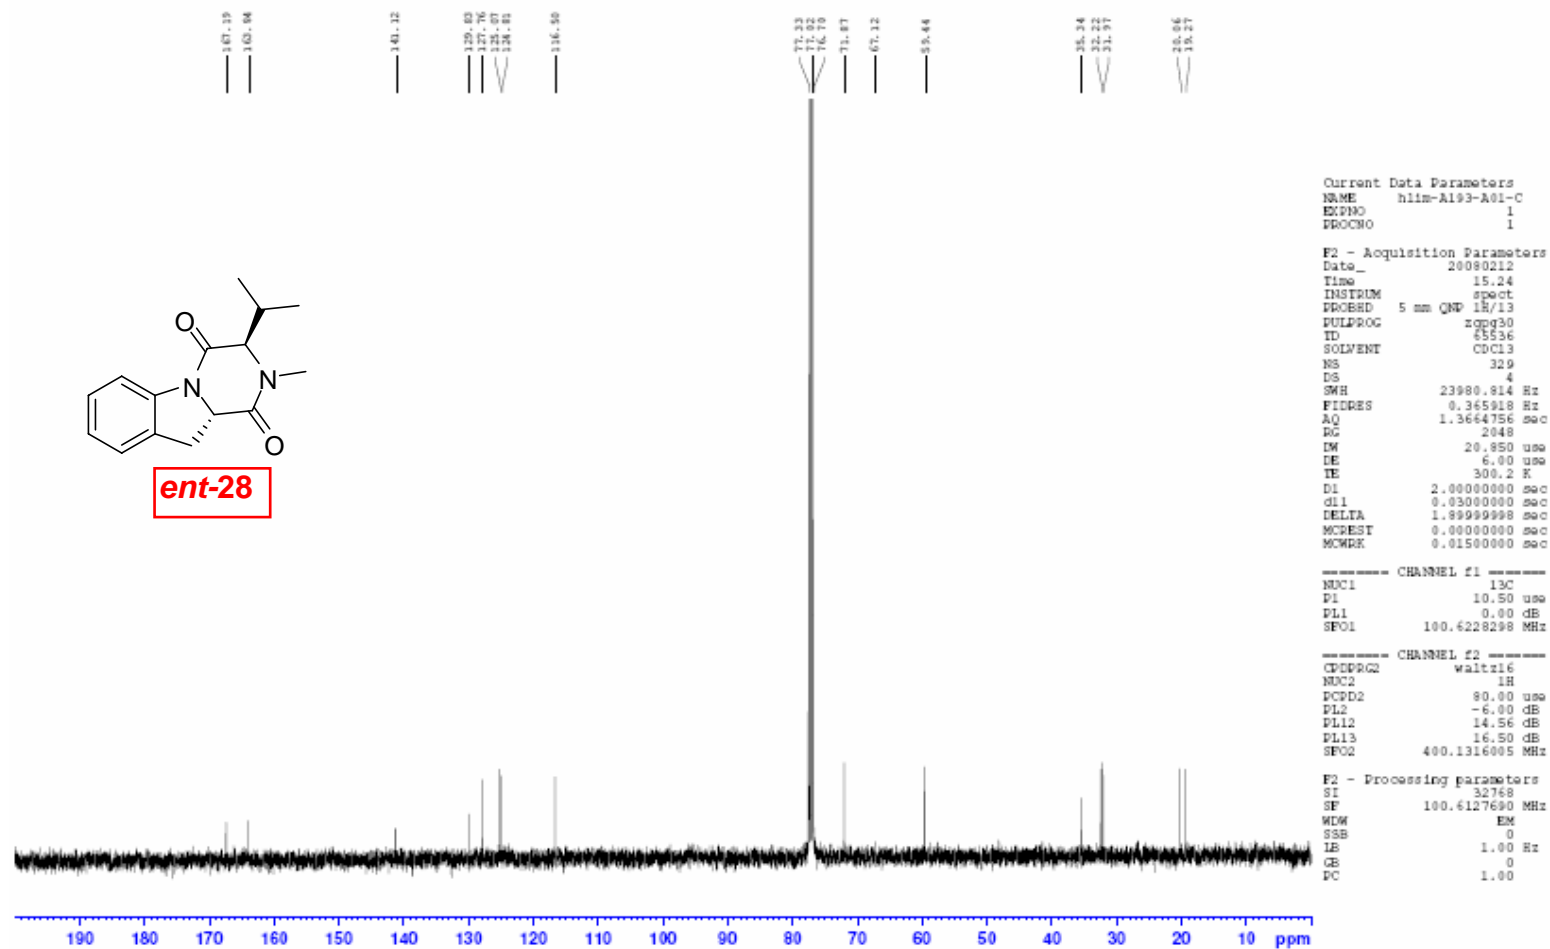

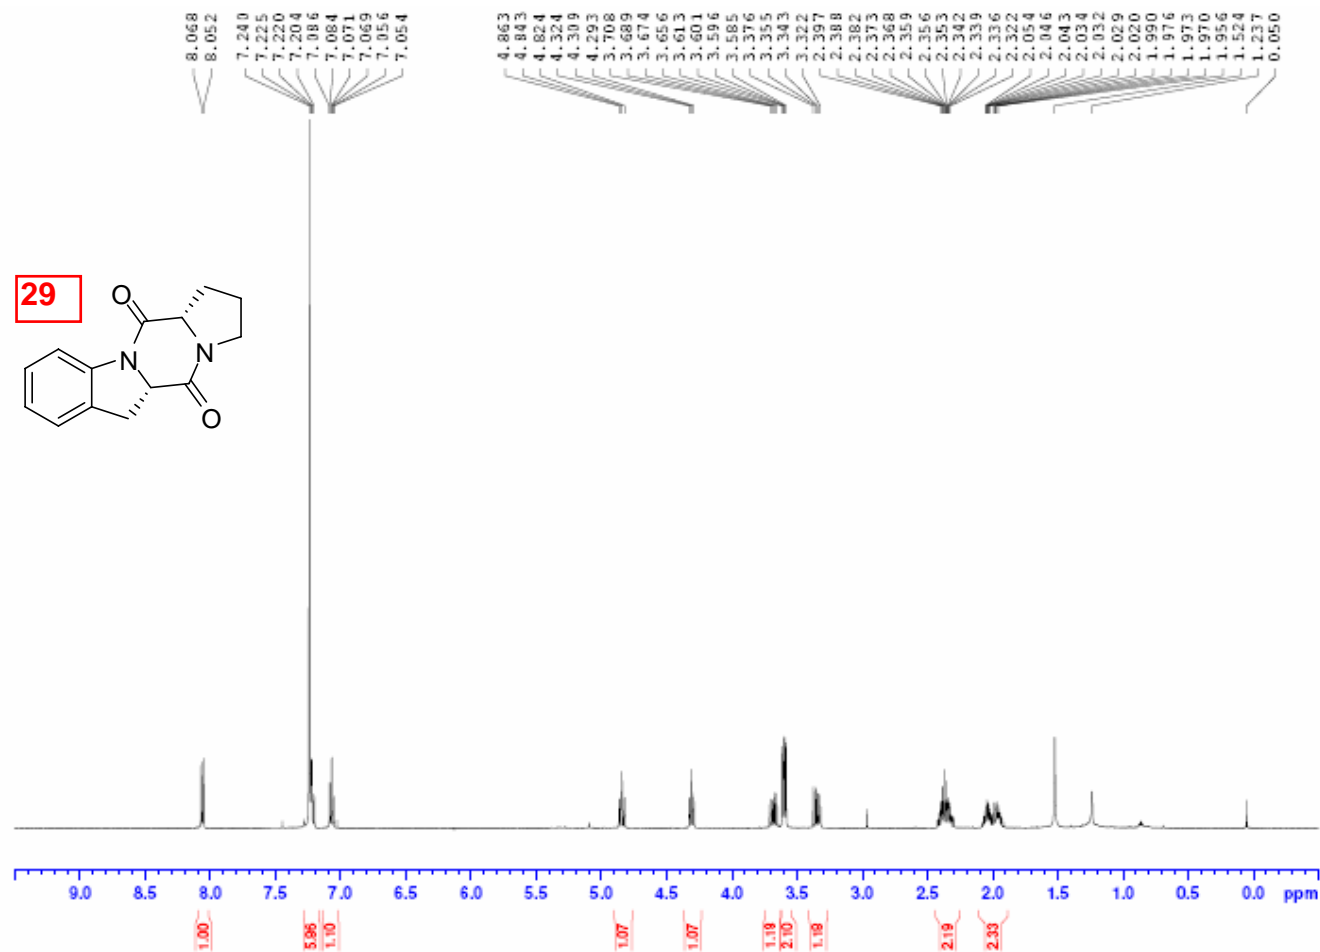

Current Date Parameters  
 NAME h11a-A212-C02  
 EXPNO 1  
 PROCNO 1

F2 - Acquisition Parameters  
 Date\_ 20080328  
 Time 11:57  
 INSTRUM spect  
 PROBRD 5 mm Multinox1  
 PULPROG zg30  
 TD 65536  
 SOLVENT CDCl3  
 NS 37  
 DS 2  
 SWH 10330.578 Hz  
 FIDRES 0.157632 Hz  
 AQ 3.1719923 sec  
 RG 1625.5  
 DM 48.400 usec  
 DE 6.00 usec  
 TE 300.2 K  
 D1 1.00000000 sec  
 MCHST 0.00000000 sec  
 MONRF 0.01500000 sec

===== CHANNEL f1 =====  
 NUCL 1H  
 P1 14.00 usec  
 PL1 -1.00 dB  
 SFOL 500.0230878 MHz

F2 - Processing parameters  
 SI 32768  
 SF 500.0200219 MHz  
 WIDW RM  
 SSB 0  
 LB 0.30 Hz  
 GB 0  
 PC 1.00

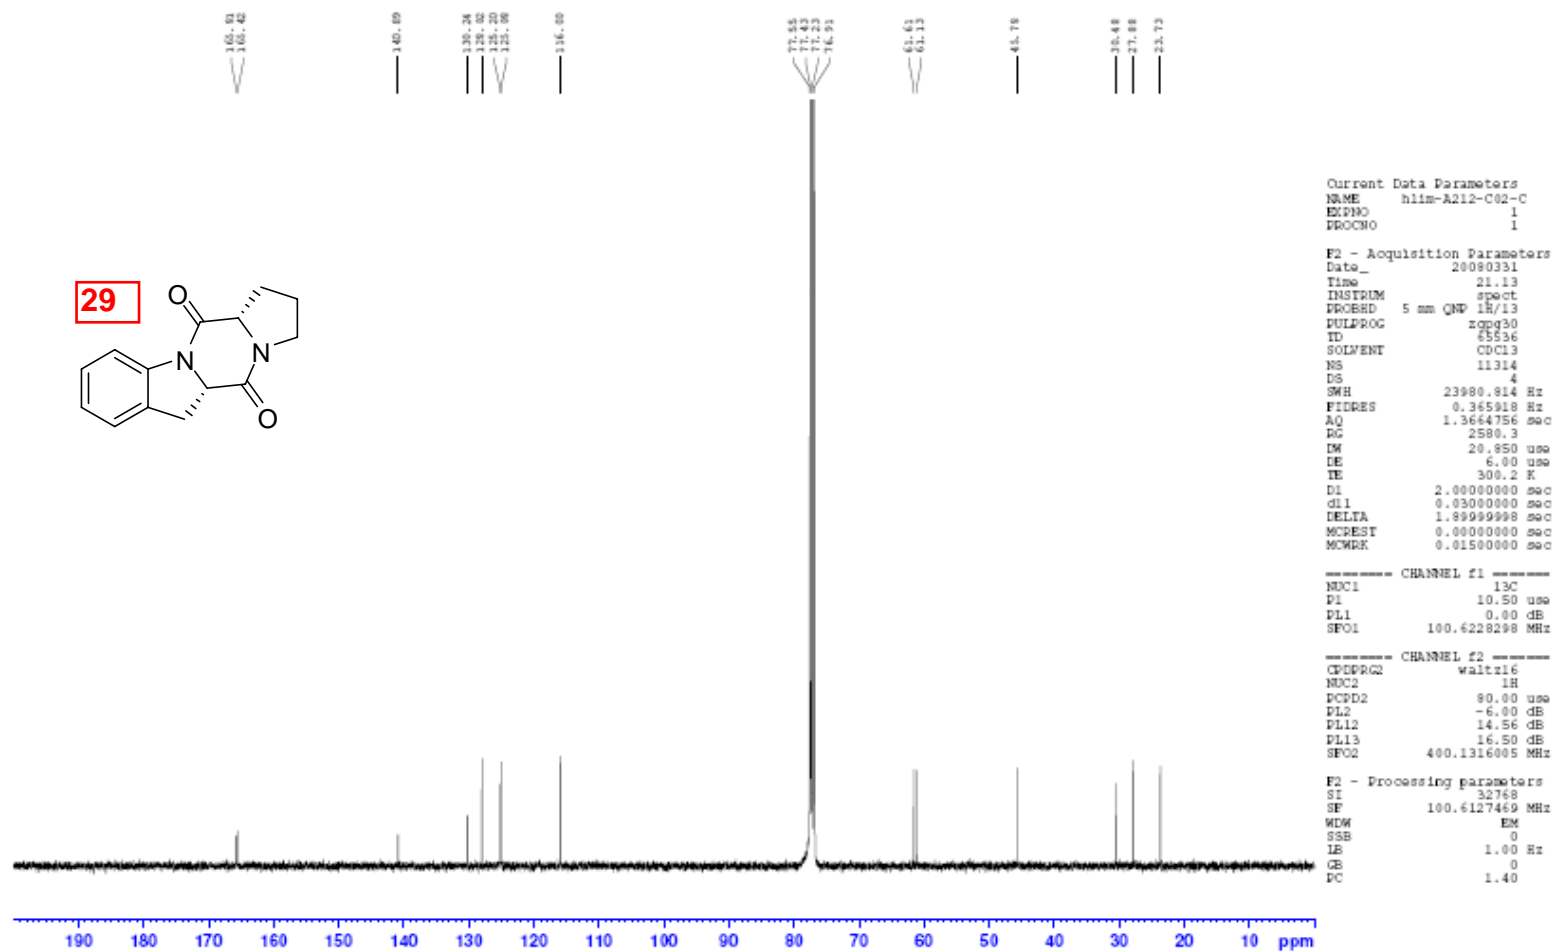

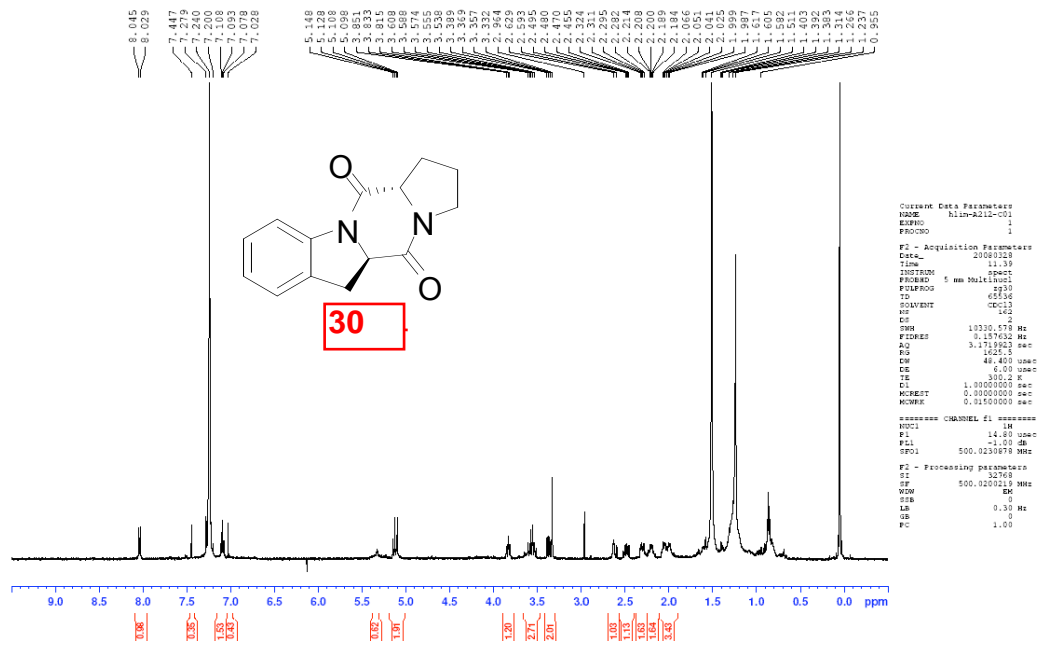

<sup>1</sup>H NMR spectrum of 30

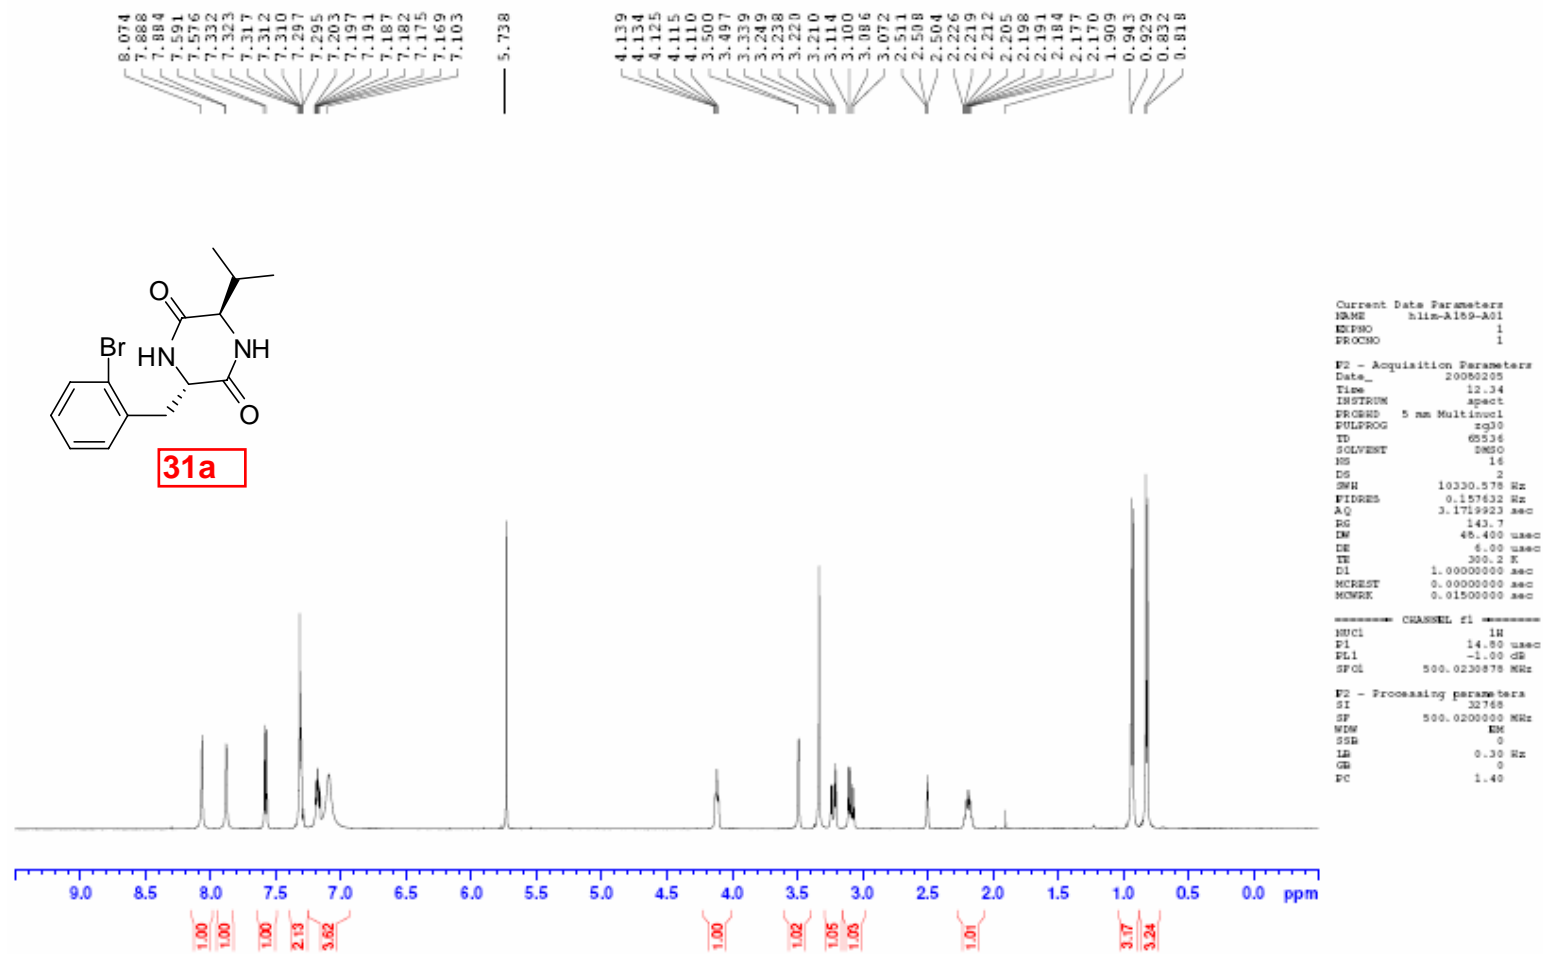

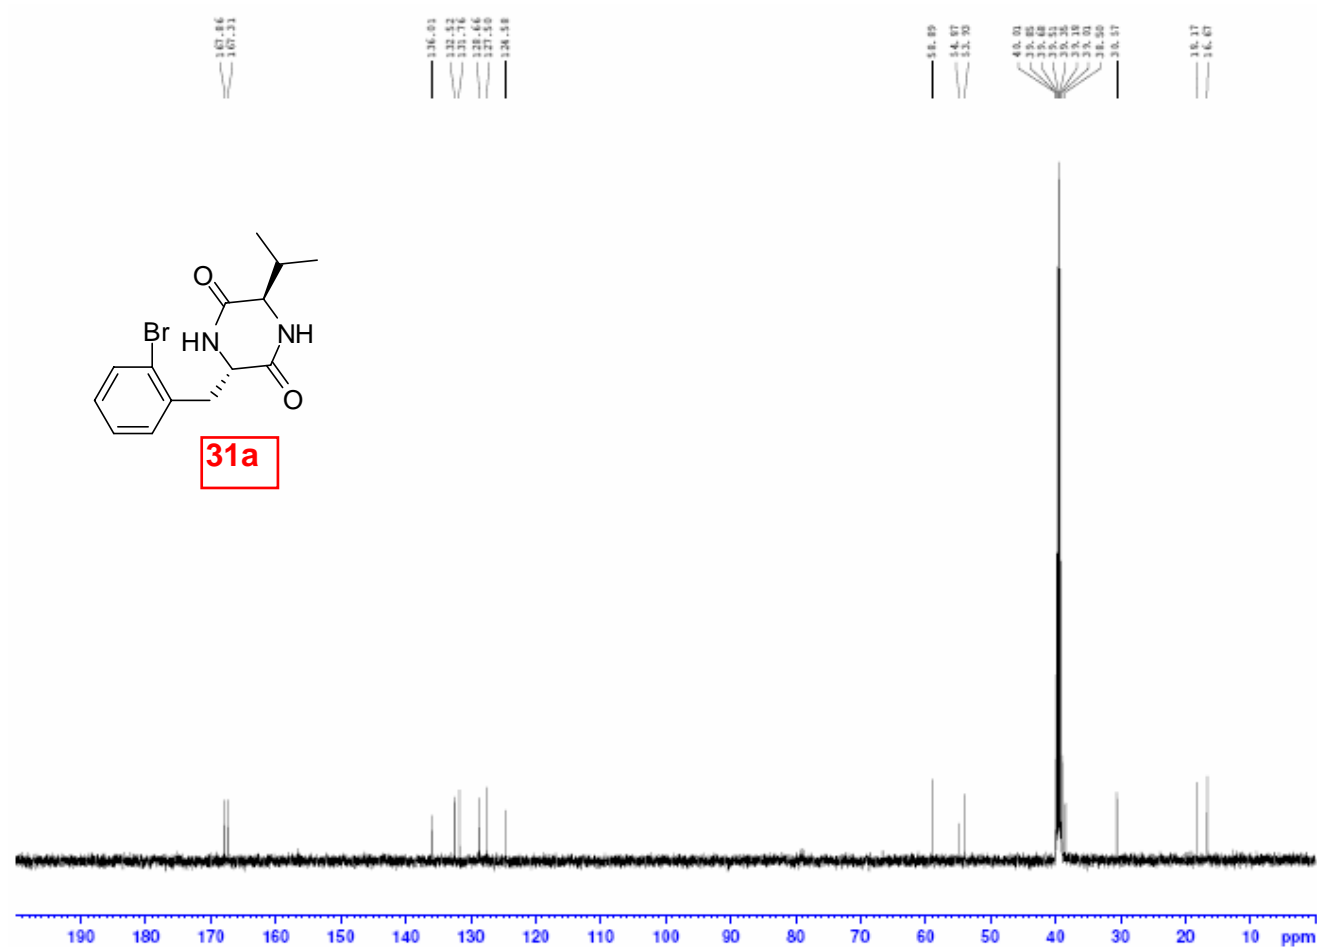

```

Current Data Parameters
NAME      h1a-A189-A01-C
EXPNO     1
PROCNO    1

F2 - Acquisition Parameters
Date_     20080205
Time      12.48
INSTRUM   spect
PROBHD    5 mm Multinuc1
PULPROG   zgpg30
TD        65536
SOLVENT   CDCl3
NS         34
DS         4
SWH        30030.029 Hz
FIDRES     0.458222 Hz
AQ         1.0912244 sec
RG         8192
DM         16.650 usec
DE         12.00 usec
TE         300.2 K
d1         2.00000000 sec
d11        0.03000000 sec
DELTA      1.89999998 sec
NOFREQ     0.00000000 sec
NOFREQ2    0.01500000 sec

===== CHANNEL f1 =====
NUC1       13C
P1         12.00 usec
PL1        3.00 dB
SFO1       125.7427020 MHz

===== CHANNEL f2 =====
CPDPRG2    waltz16
NUC2       1H
PCPD2      100.00 usec
PL2        -1.00 dB
PL12       19.80 dB
PL13       22.50 dB
SFO2       500.0220001 MHz

F2 - Processing parameters
SI         32768
SF         125.7301939 MHz
WDW        EM
SSB        0
LB         1.00 Hz
GB         0
PC         1.40

```

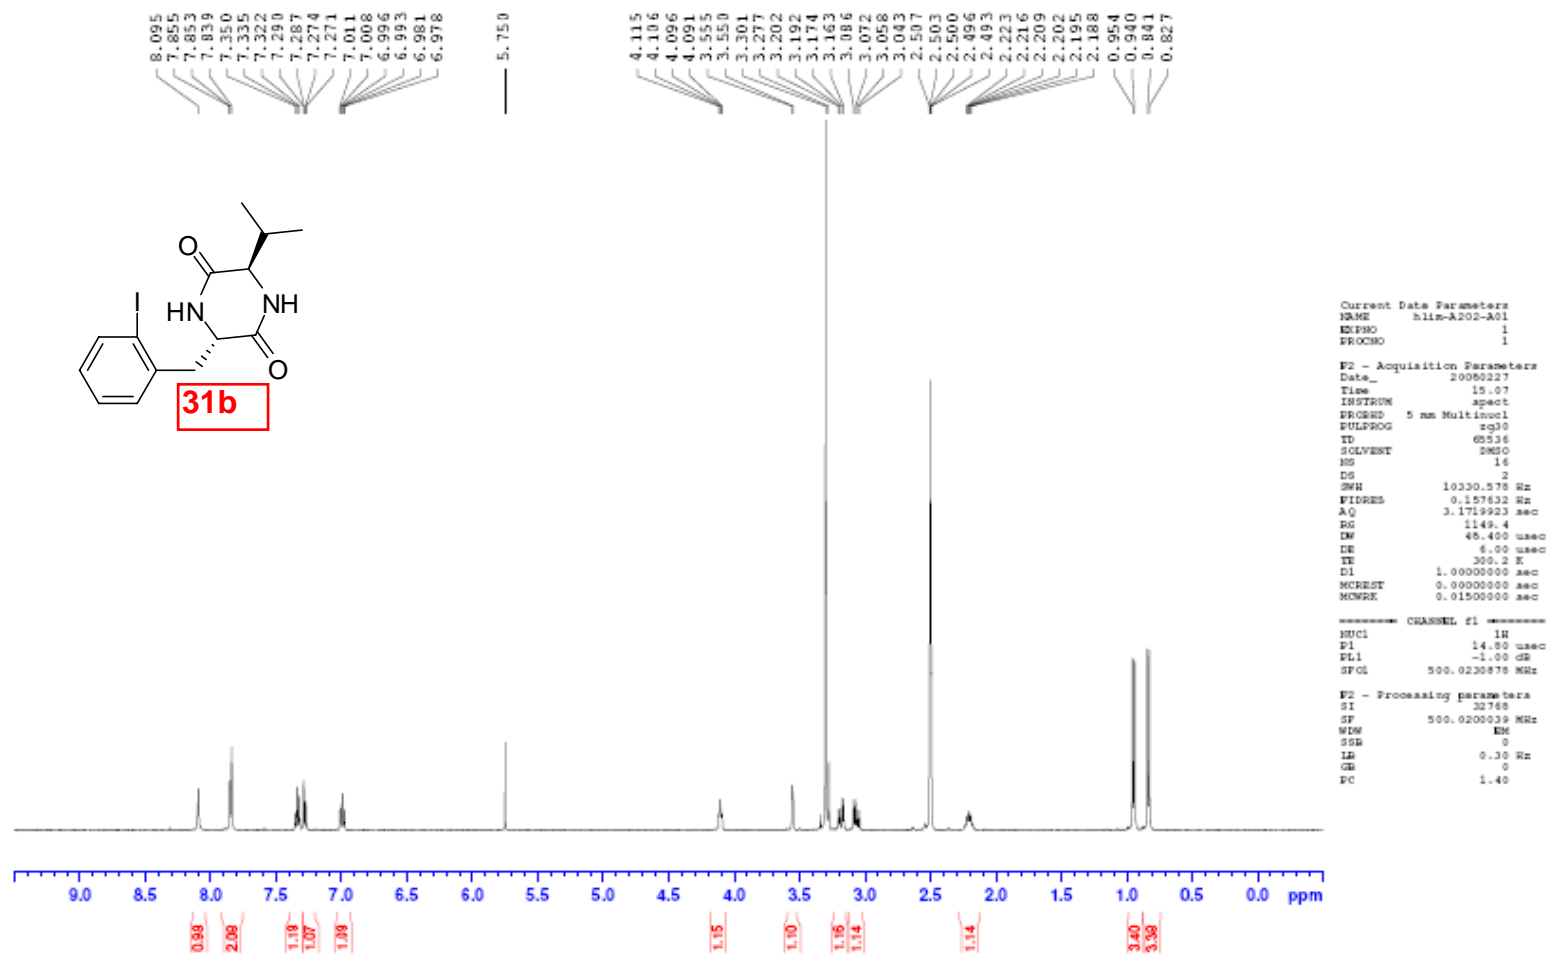

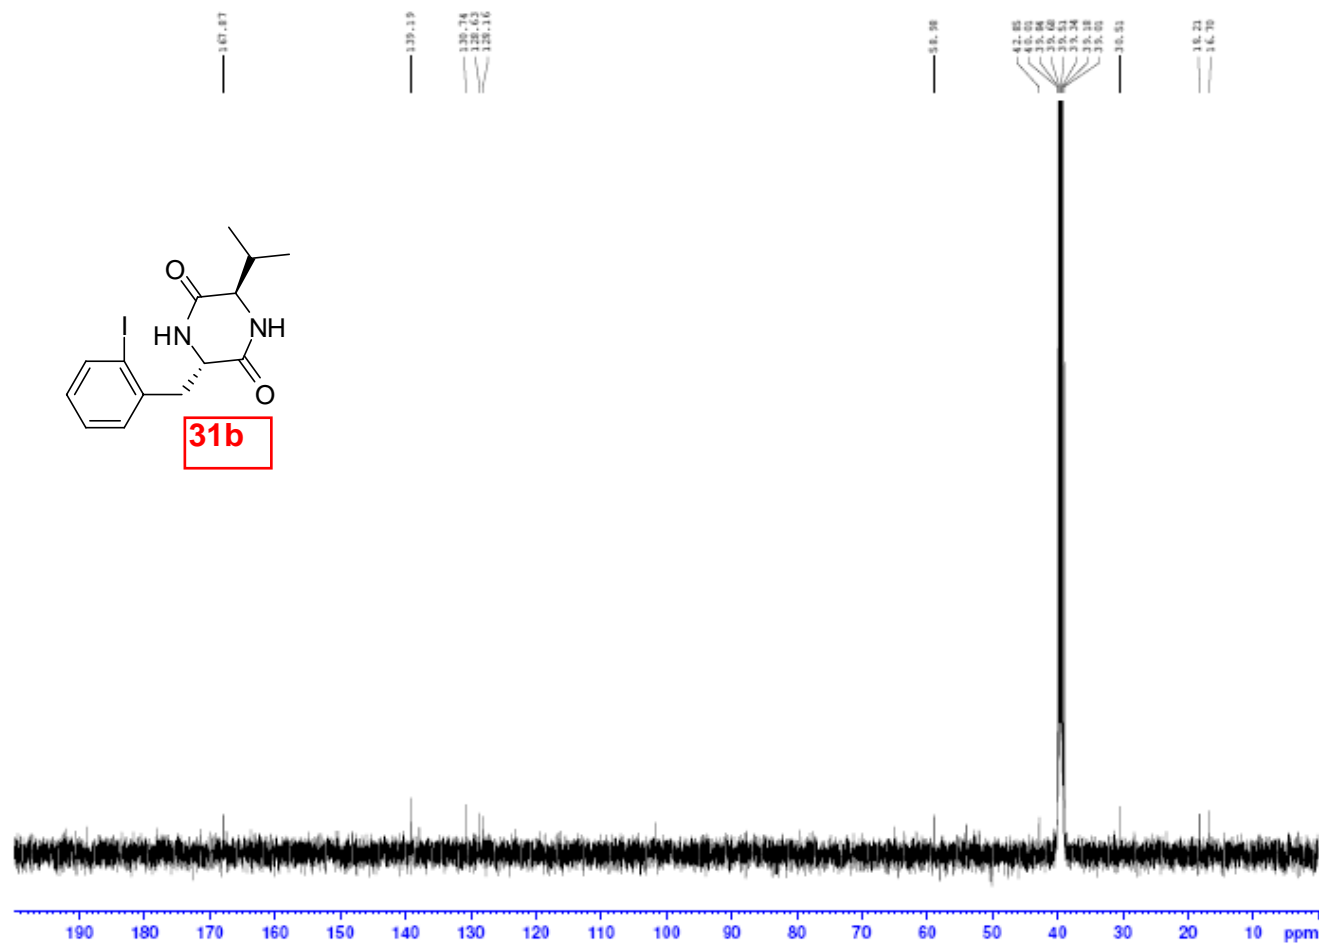

```

Current Data Parameters
NAME      hlm-A202-A01-C
EXPNO     1
PROCNO    1

F2 - Acquisition Parameters
Date_     20080303
Time      15.48
INSTRUM   spect
PROBHD    5 mm Multinucl
PULPROG   zgpg30
TD         65536
SOLVENT   DMSO
NS         242
DS         4
SWH        30030.029 Hz
FIDRES     0.408222 Hz
AQ         1.0912244 sec
RG         11595.2
DM         16.650 usec
DE         12.00 usec
TE         300.2 K
D1         2.0000000 sec
d11        0.0300000 sec
DELTA      1.89999998 sec
NORESET    0.0000000 sec
NCHRG      0.0150000 sec

===== CHANNEL f1 =====
NUC1       13C
P1         12.00 usec
PL1        3.00 dB
SFO1       125.7427020 MHz

===== CHANNEL f2 =====
CPDPRG2    waitz16
NUC2       1H
PCPD2      100.00 usec
PL2        -1.00 dB
PL12       19.80 dB
PL13       22.50 dB
SFO2       500.0220001 MHz

F2 - Processing parameters
SI         32768
SF         125.7301948 MHz
WDW        EM
SSB        0
LB         1.00 Hz
GB         0
PC         1.40

```



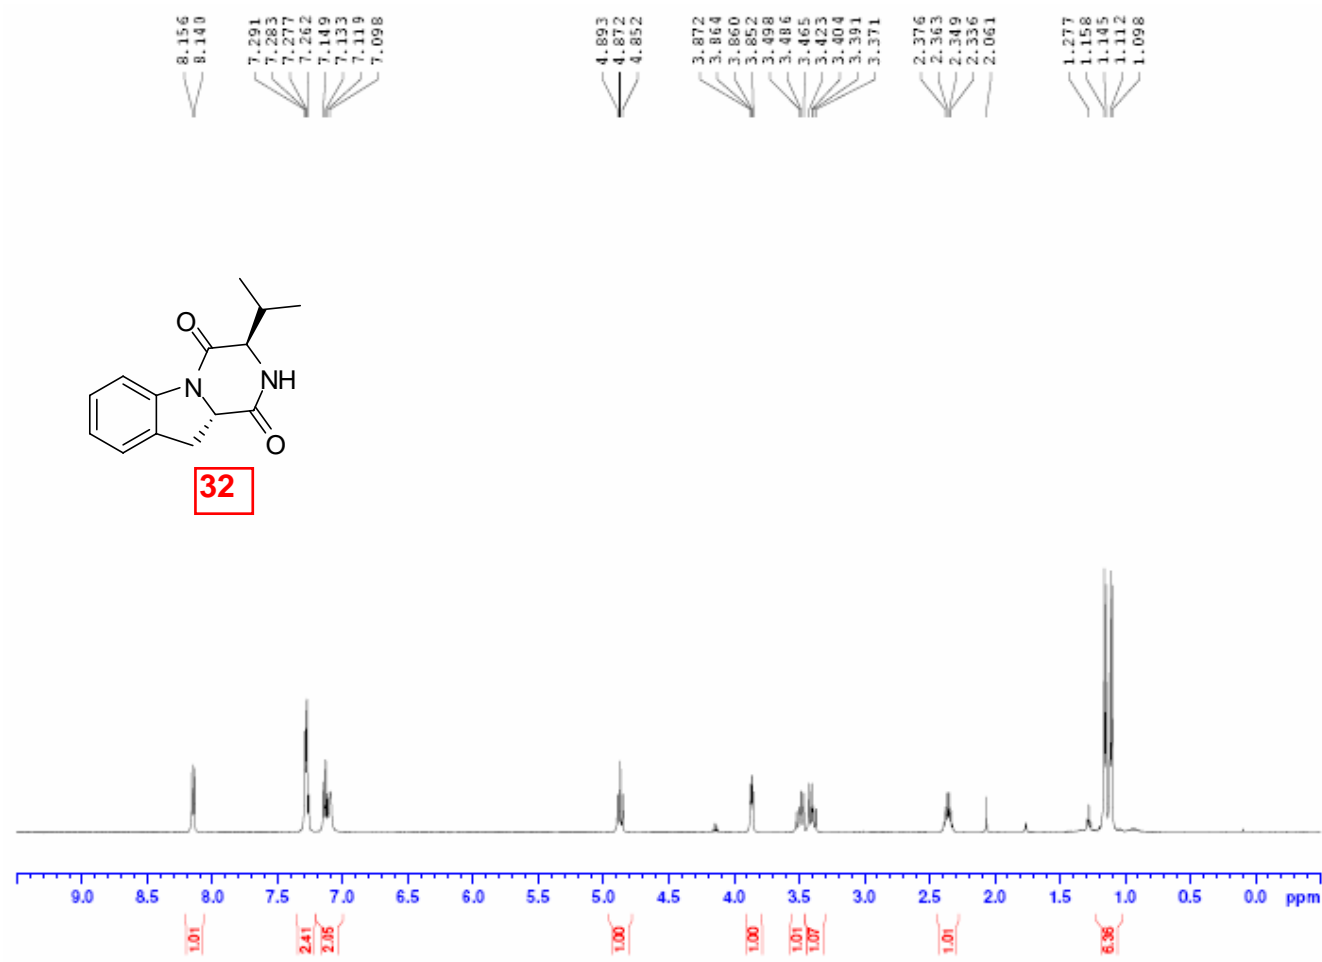

Current Data Parameters  
NAME hlm-A191-A01D  
EXPNO 1  
PROCNO 1

F2 - Acquisition Parameters  
Date\_ 20060211  
Time 10.44  
INSTRUM spect  
PROBHD 5 mm Multinuc1  
PULPROG zg30  
TD 65536  
SOLVENT CDCl3  
NS 16  
DS 2  
SWH 10330.578 Hz  
FIDRES 0.157632 Hz  
AQ 3.1719923 sec  
RG 228.1  
DM 46.400 usec  
DE 6.00 usec  
TE 300.2 K  
D1 1.00000000 sec  
MCREST 0.00000000 sec  
MORPH 0.01500000 sec

===== CHANNEL f1 =====  
NUC1 1H  
P1 14.00 usec  
PL1 -1.00 dB  
SFO1 500.0230878 MHz

F2 - Processing parameters  
SI 32768  
SF 500.0205000 MHz  
WDW EM  
SSB 0  
LB 0.30 Hz  
GB 0  
PC 1.00

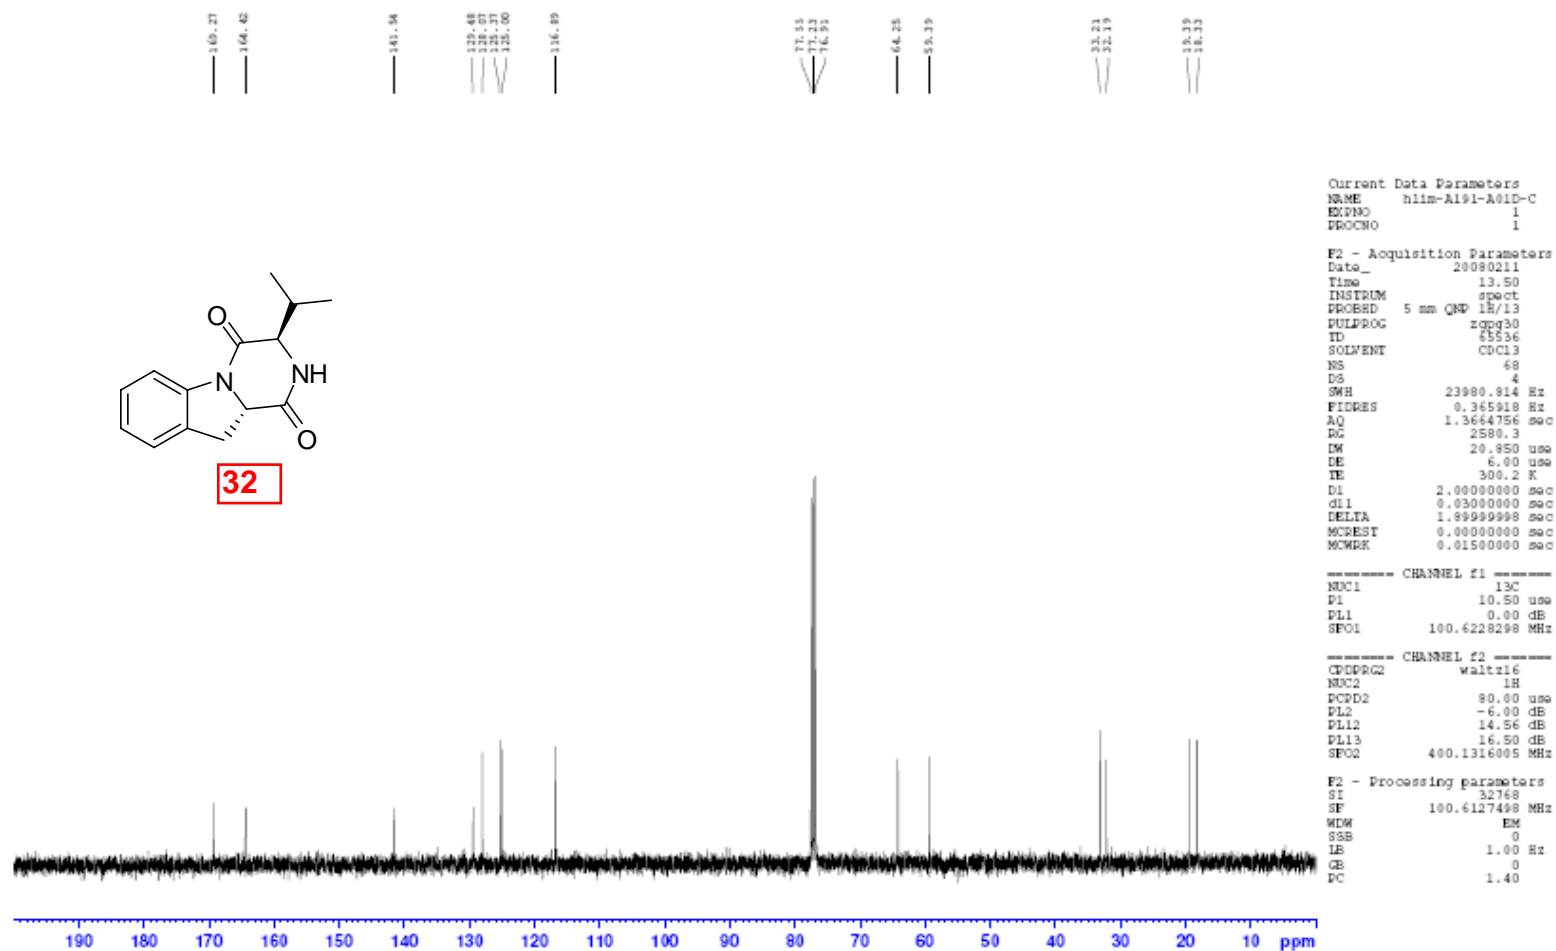

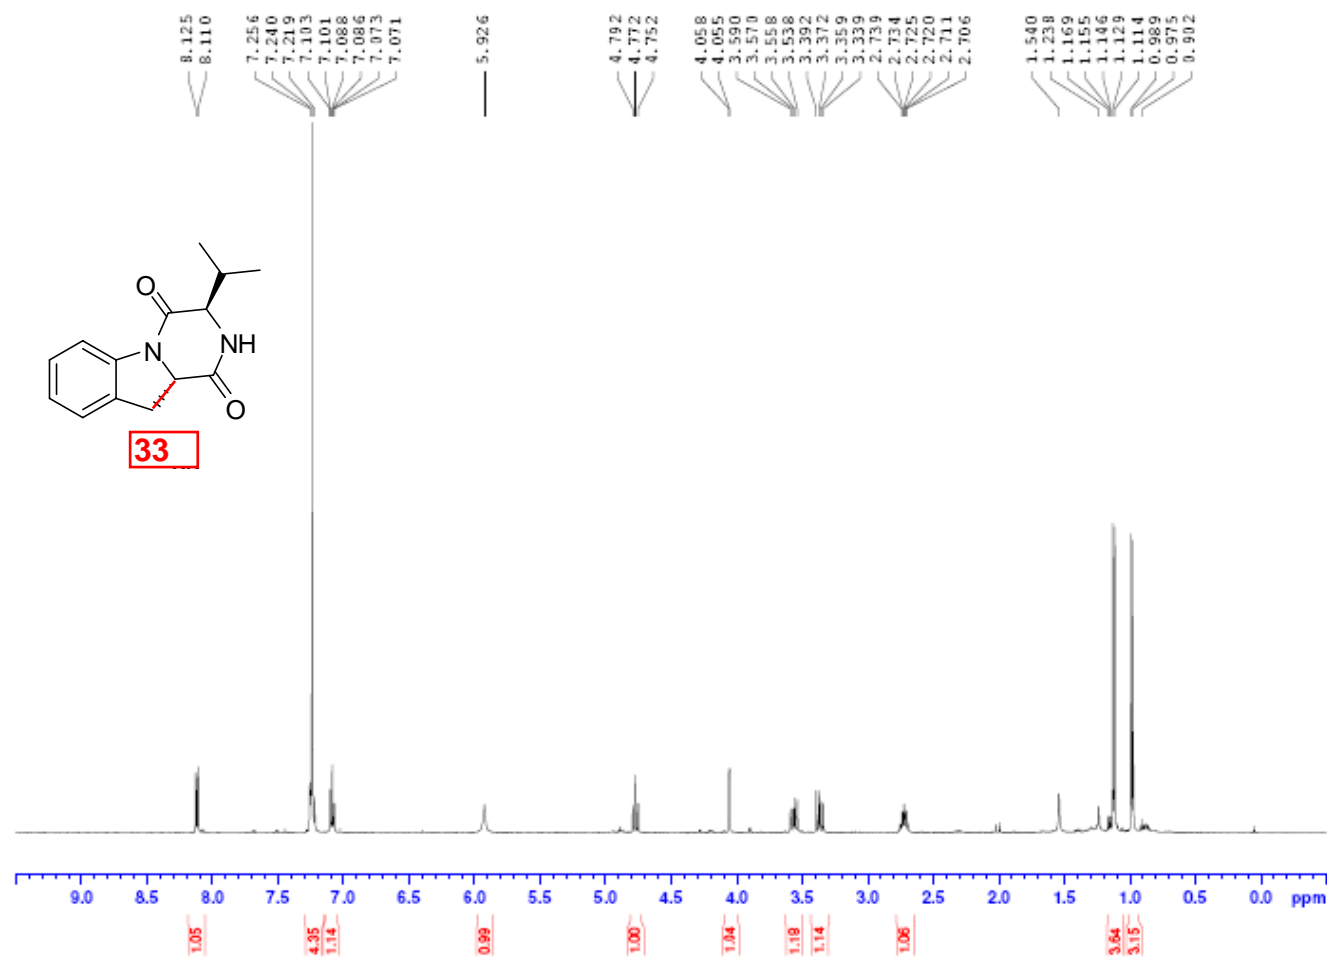

Current Date Parameters  
NAME hlm-191-A01U  
EXPNO 1  
PROCNO 1

F2 - Acquisition Parameters  
Date\_ 20080211  
Time 11.31  
INSTRUM spect  
PROBHD 5 mm Multinuc1  
PULPROG zg30  
TD 65536  
SOLVENT CDCl3  
NS 16  
DS 2  
SWH 10330.578 Hz  
FIDRES 0.157632 Hz  
AQ 3.1719923 sec  
RG 832.7  
DM 48.400 usec  
DE 6.00 usec  
TE 300.2 K  
D1 1.00000000 sec  
MCREST 0.00000000 sec  
MCMRG 0.01500000 sec

===== CHANNEL f1 =====  
NUC1 1H  
P1 14.80 usec  
PL1 -1.00 dB  
SFO1 500.0230878 MHz

F2 - Processing parameters  
SI 32768  
SF 500.0230878 MHz  
WDW EM  
SSB 0  
LB 0.30 Hz  
GB 0  
PC 1.00

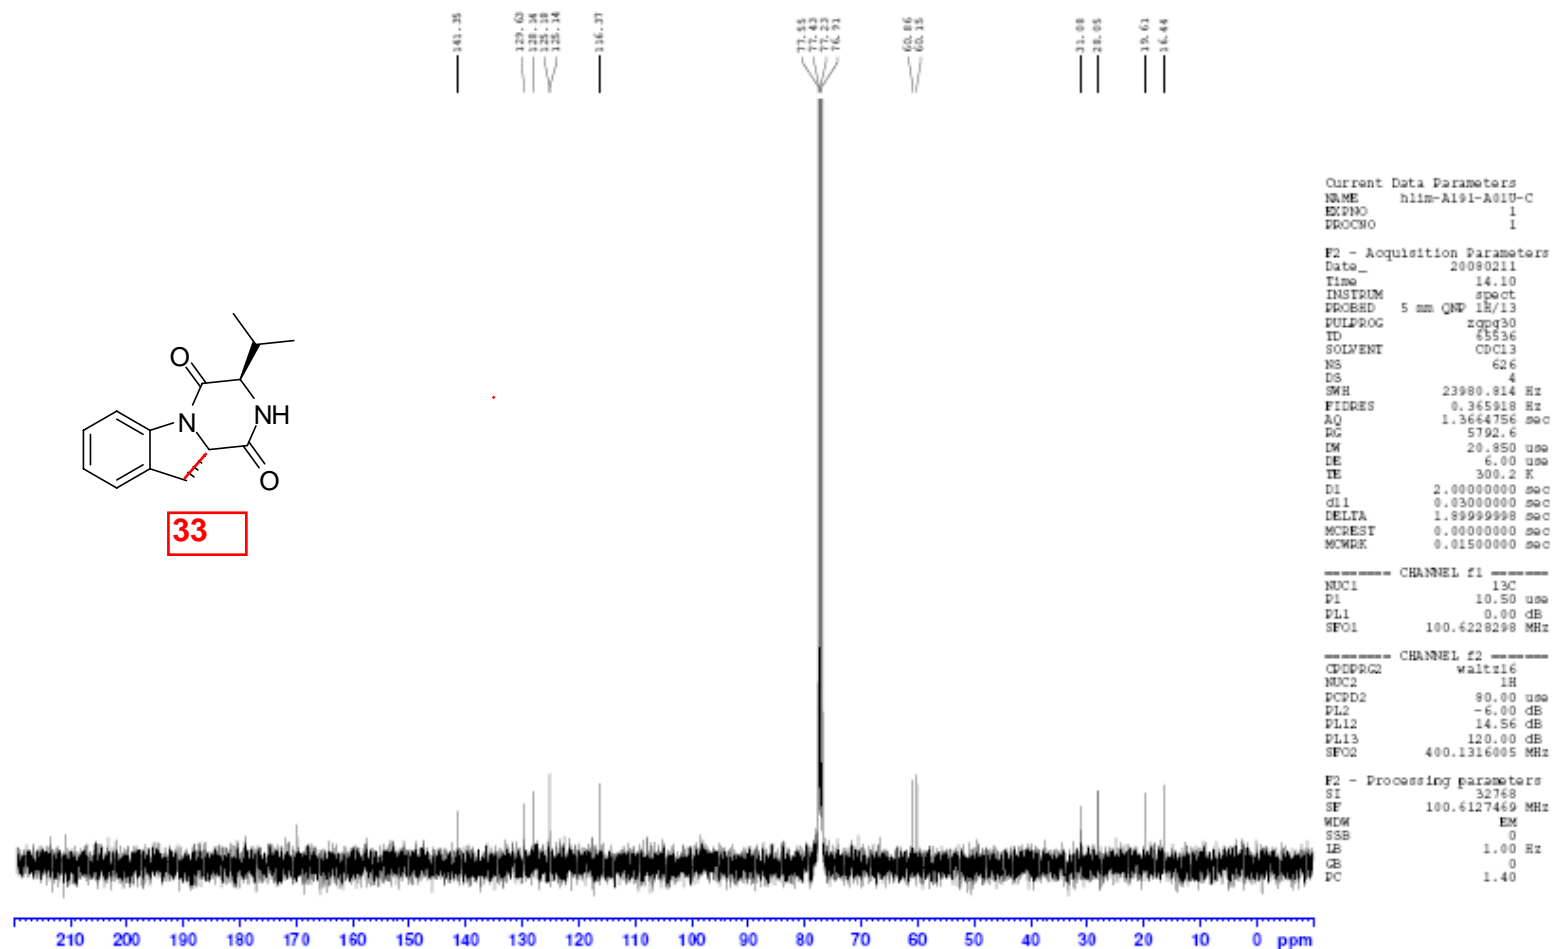

ORTEP Diagram of Tetracyclic Adduct 14 (see CIF for details)

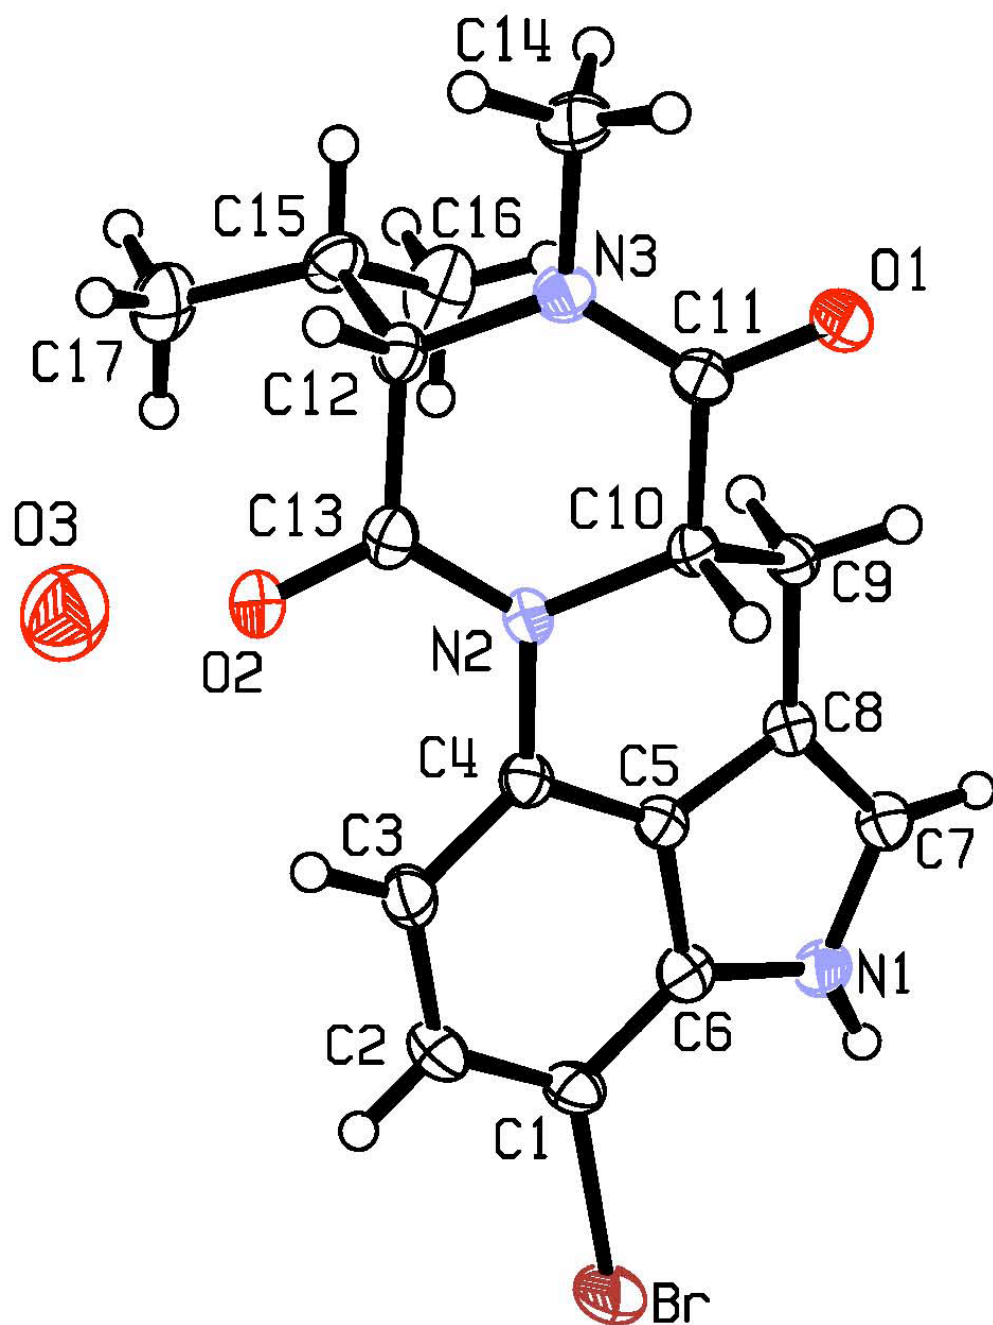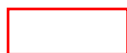

Supplement: Supplementary file 1 [file 4465825]
